# Supplementary material for: Halogenation effects in intramolecular furan Diels–Alder reactions: broad scope synthetic and computational studies
Source: Royal Society of Chemistry journal article supplement (doi:10.1039/c3ob41616j), 2013-01-01
Supplement: c3ob41616j_2.pdf [file c3ob41616j_2.pdf]

## **Halogenation Effects in Intramolecular Furan Diels-Alder Reactions: Broad Scope Synthetic and Computational Studies**

Robert L. Rae, Justyna M. Żurek, Martin J. Paterson\* and Magnus W. P. Bebbington\*

Institute of Chemical Science

Heriot-Watt University

Electronic supporting information S2

DFT-calculated (B3LYP/6-31G) pictorial representations of FMOs and HOMO-LUMO energy differences for model furan/ethylene and 2-chlorofuran/ethylene Diels-Alder reactions as well as for substrates **1a-1z**.

## Furan/ethylene reaction

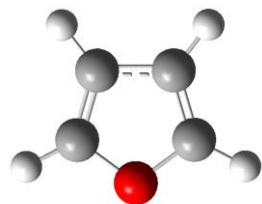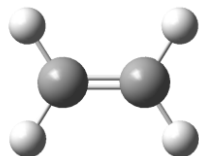

LUMO

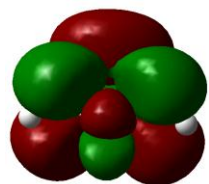

LUMO

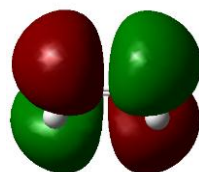

HOMO

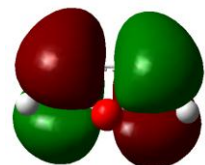

HOMO

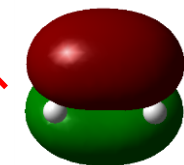

H/L gap  
 $E=0.24323 \text{ au} = 6.62 \text{ eV}$

H/L gap  
 $E=0.28627 \text{ au} = 7.79 \text{ eV}$

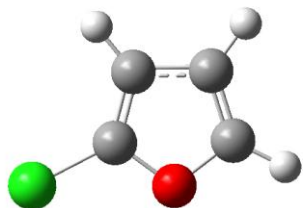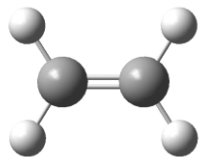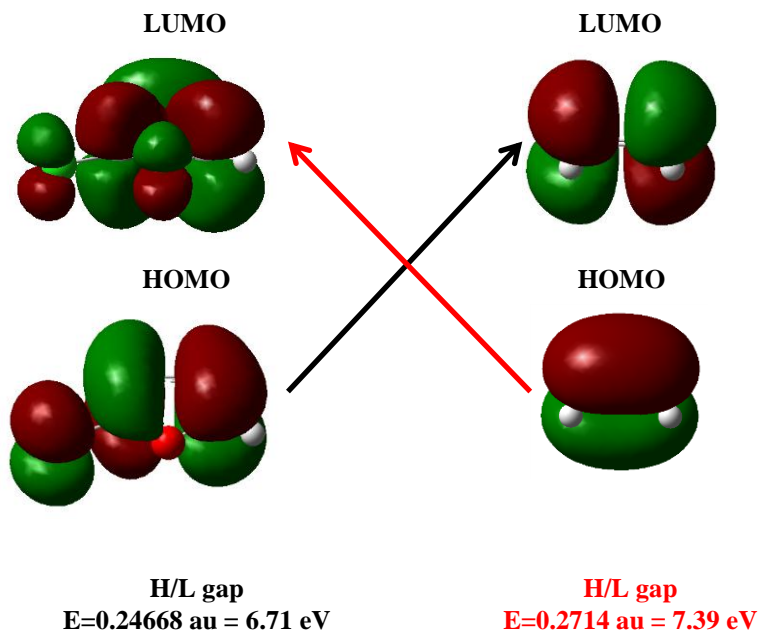

### Reaction 1a

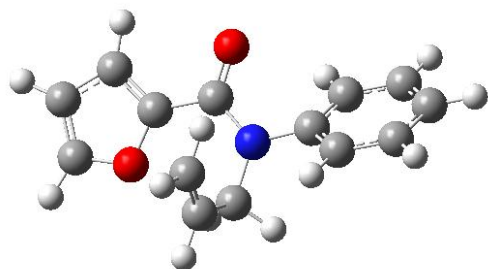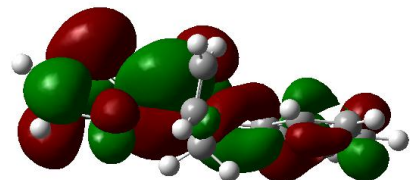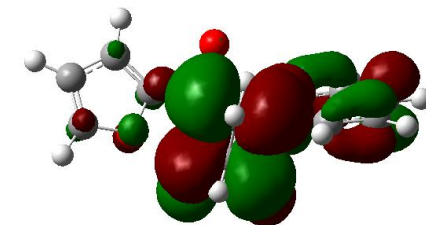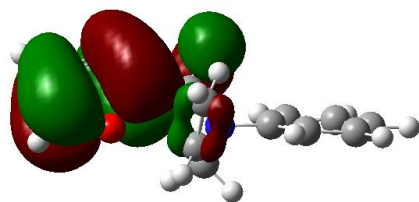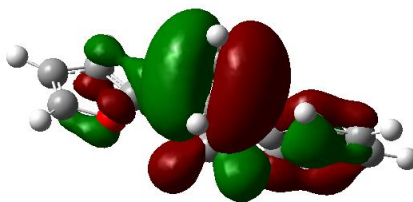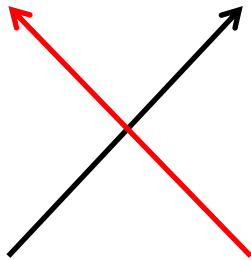

H/L gap  
 $E=0.25329 \text{ au} = 6.89 \text{ eV}$

H/L gap  
 $E=0.22915 \text{ au} = 6.24 \text{ eV}$

**Reaction 1b**

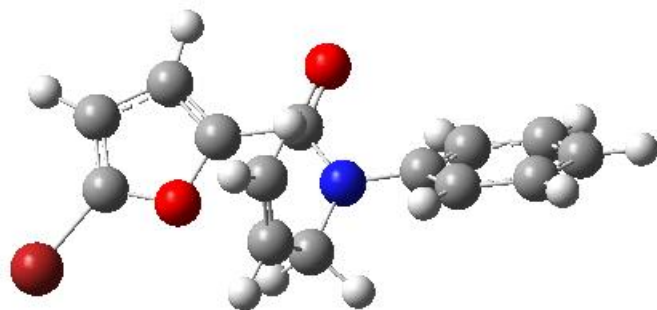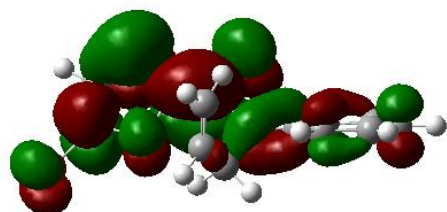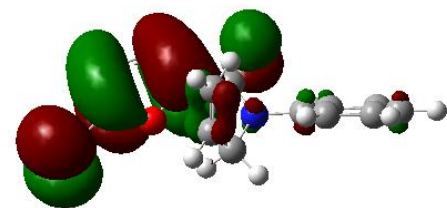

H/L gap  
E=0.25005 au = 6.8 eV

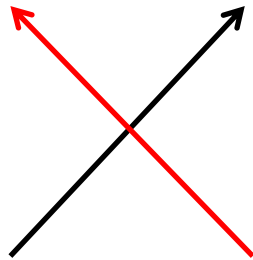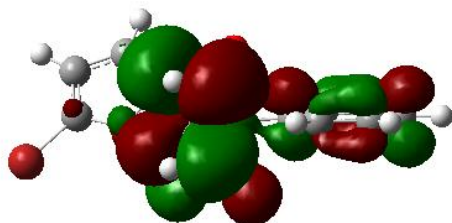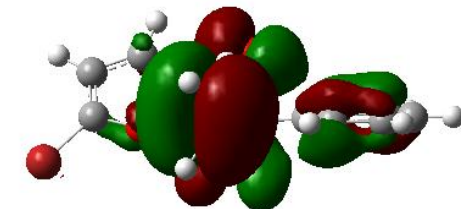

H/L gap  
E=0.22425 au = 6.1 eV

**Reaction 1c**

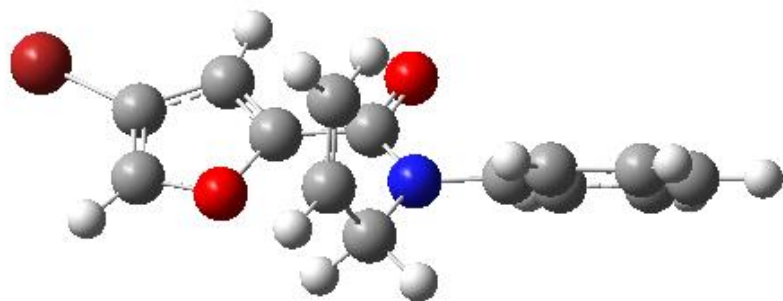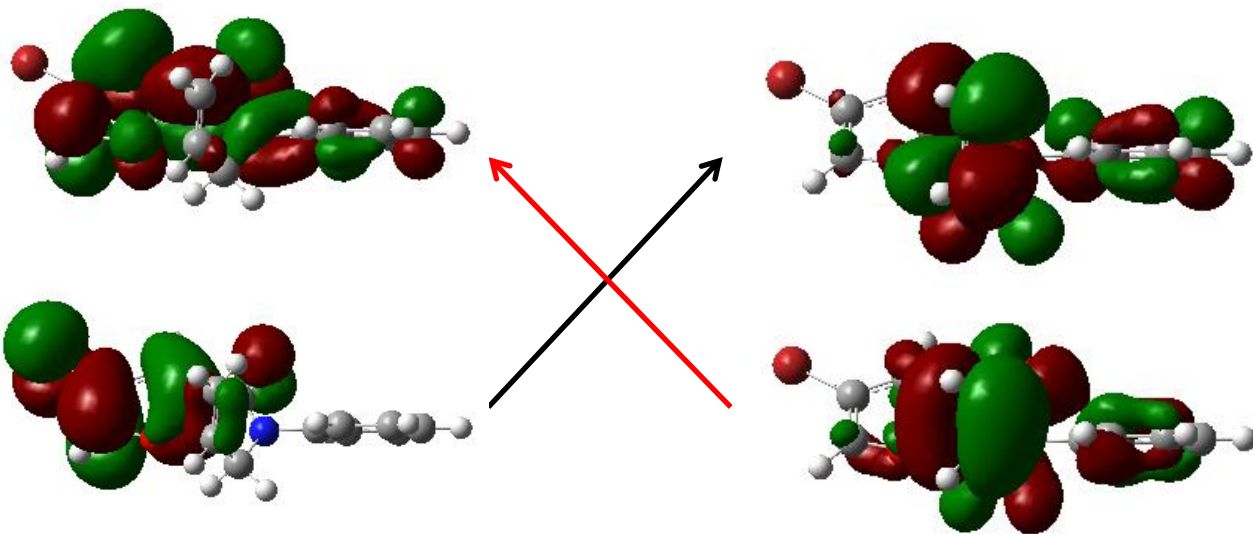

H/L gap  
 $E=0.25415 \text{ au} = 6.92 \text{ eV}$

H/L gap  
 $E=0.22507 \text{ au} = 6.12 \text{ eV}$

**Reaction 1d**

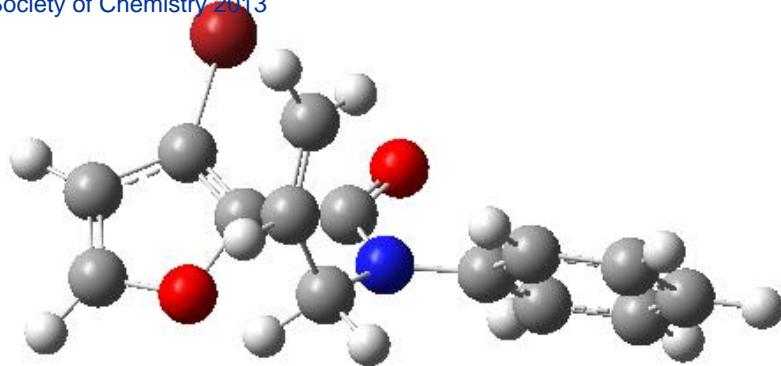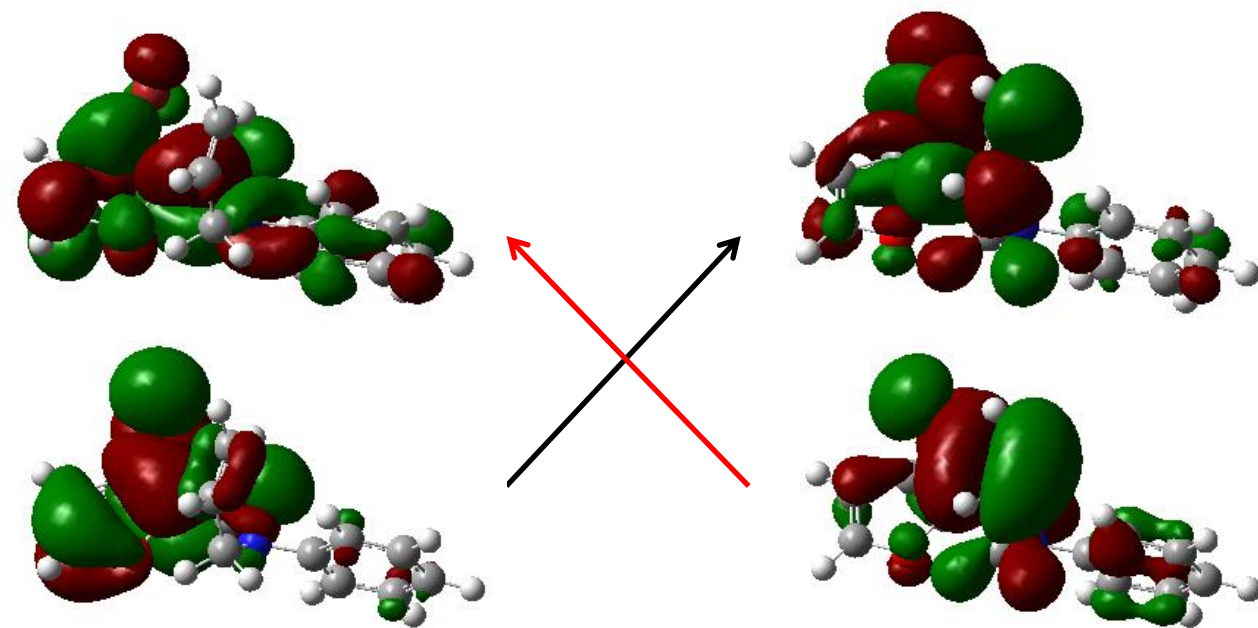

H/L gap  
 $E=0.25114 \text{ au} = 6.83 \text{ eV}$

H/L gap  
 $E=0.22484 \text{ au} = 6.12 \text{ eV}$

**Reaction 1e**

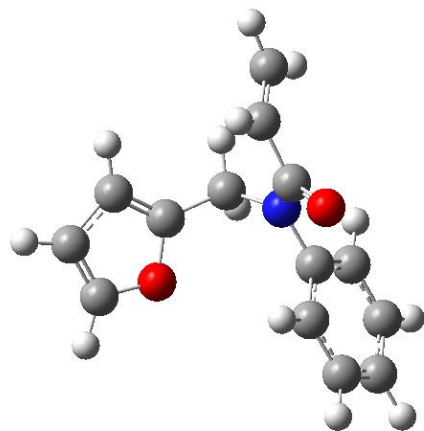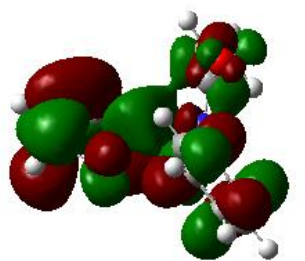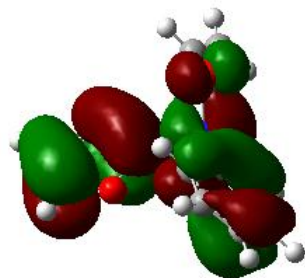

**H/L gap**  
**E=0.19763 au = 5.38 eV**

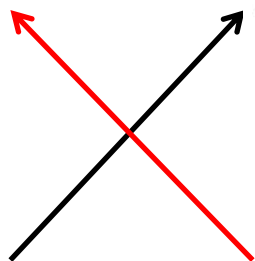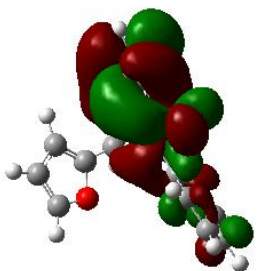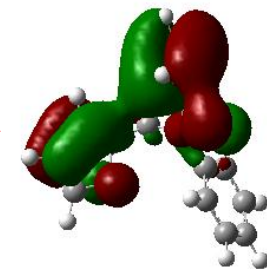

**H/L gap**  
**E=0.29564 au = 7.76 eV**

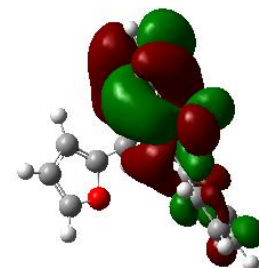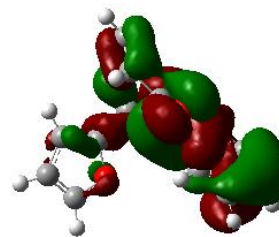

**H/L gap**  
**E=0.27703 au = 7.25 eV**



**Reaction 1f**

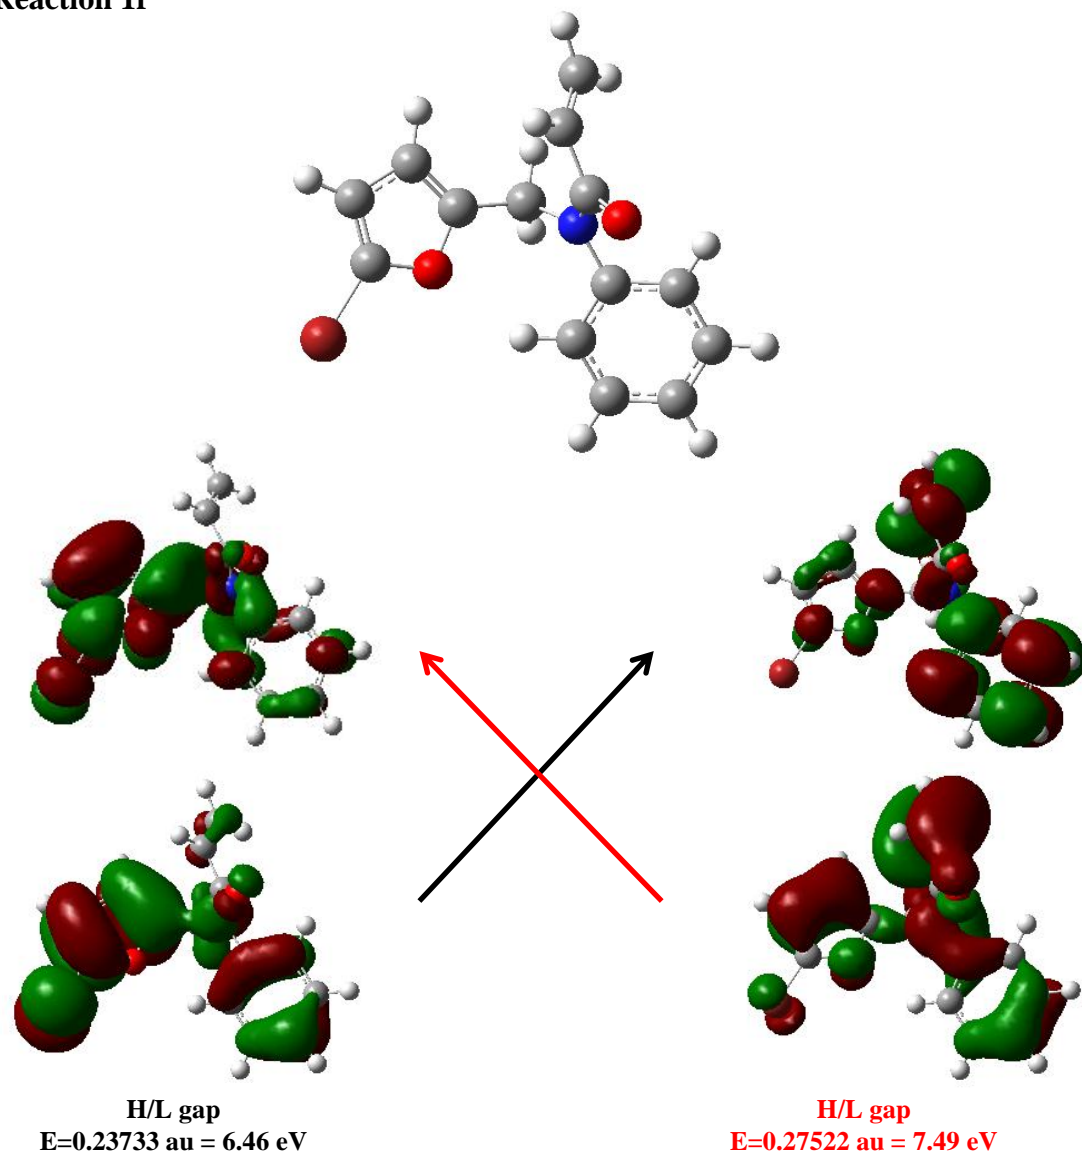

### Reaction 1g

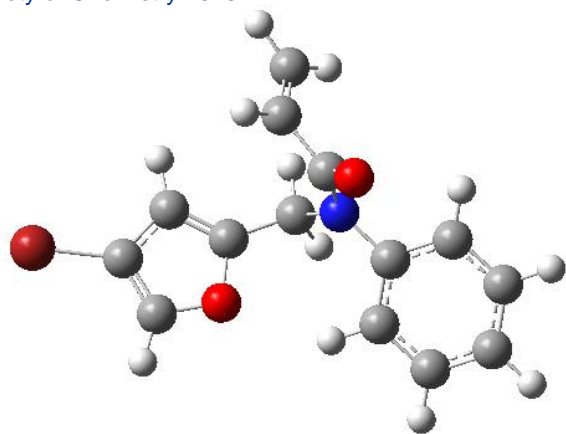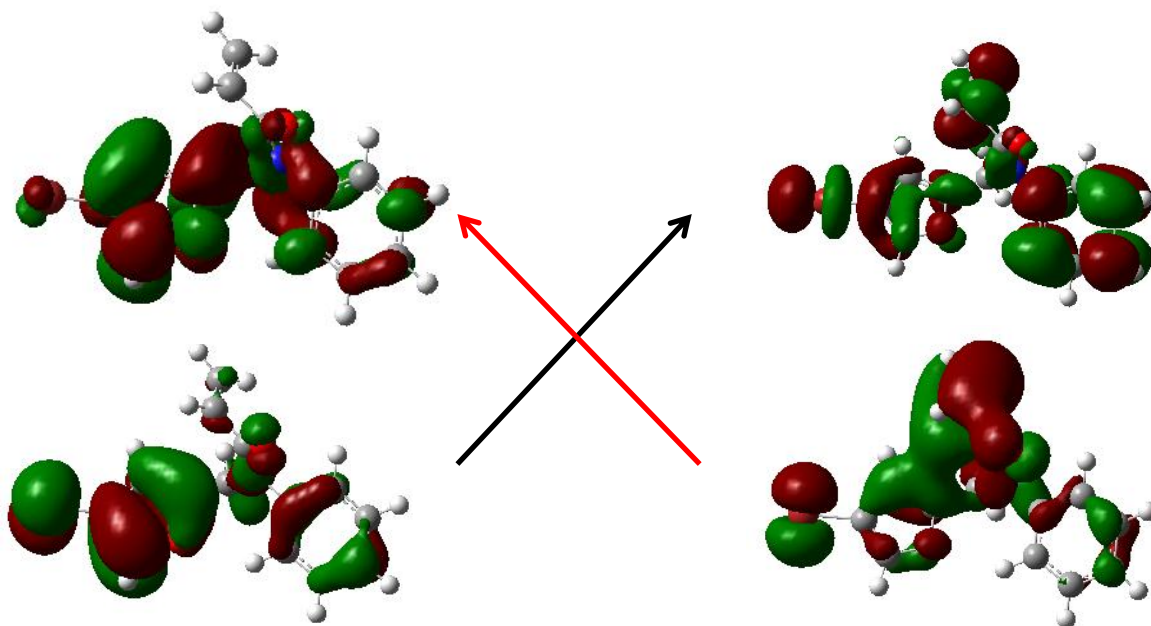

H/L gap  
E=0.24191 au = 6.58 eV

H/L gap  
E=0.27922 au = 7.6 eV

### Reaction 1h

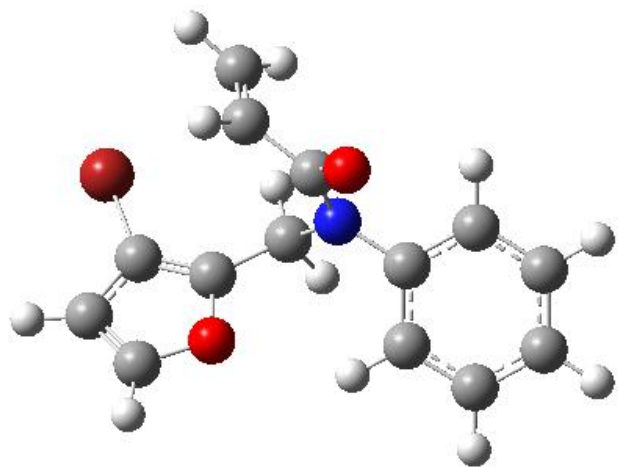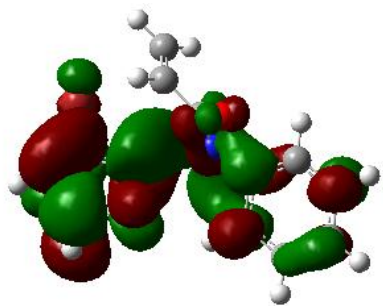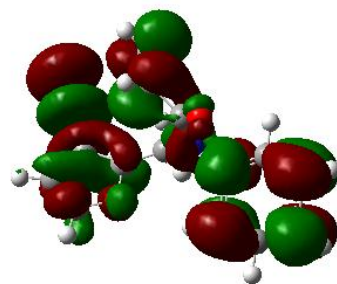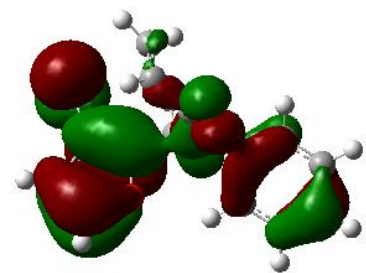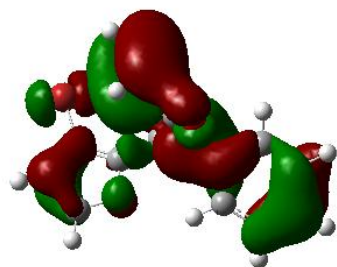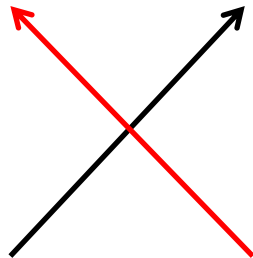

H/L gap  
E=0.24545 au = 6.68 eV

H/L gap  
E=0.27246 au = 7.41 eV

### Reaction 1i

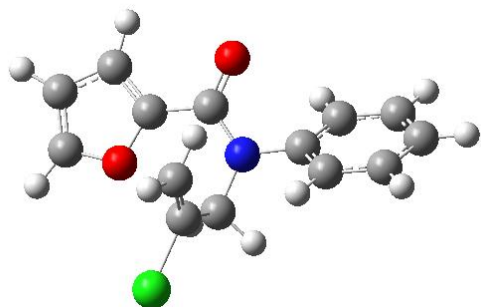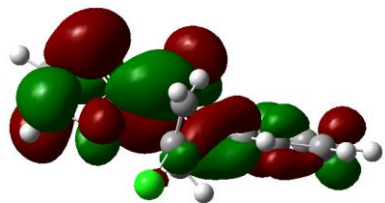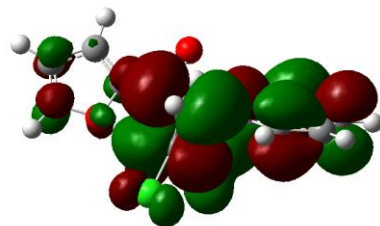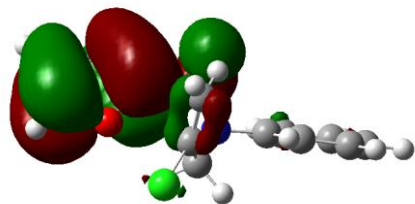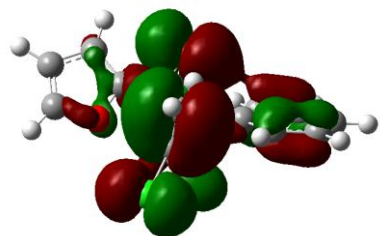

H/L gap  
 $E=0.24051 \text{ au} = 6.55 \text{ eV}$

H/L gap  
 $E=0.21775 \text{ au} = 5.93 \text{ eV}$

**Reaction 1j**

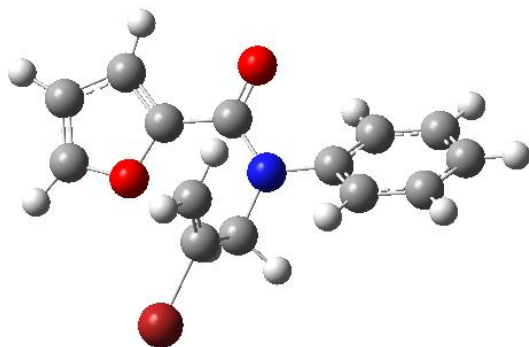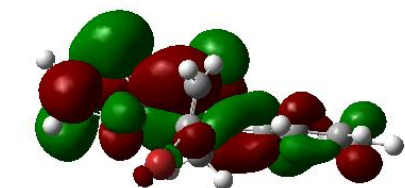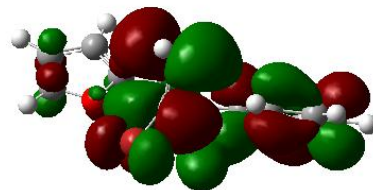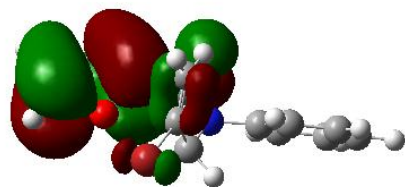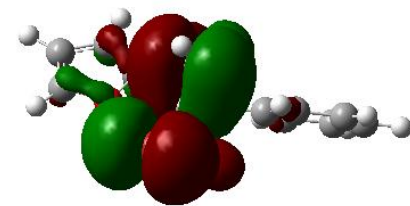

H/L gap  
E=0.23549 au = 6.41 eV

H/L gap  
E=0.21314 au = 5.80 eV

**Reaction 1k**

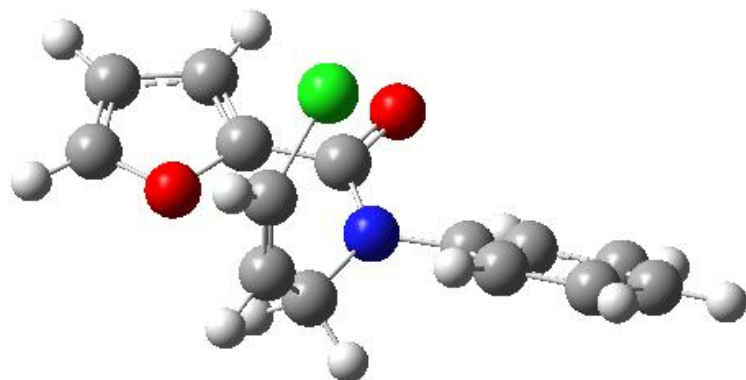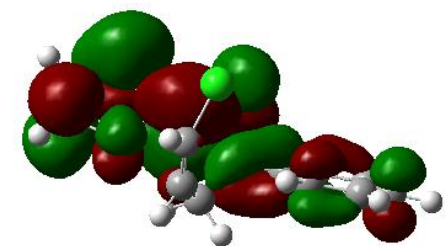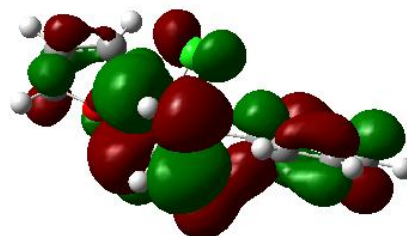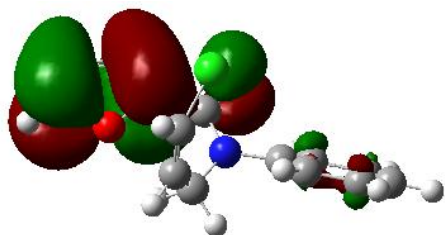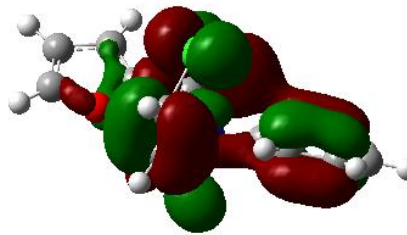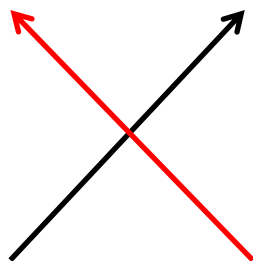

H/L gap  
 $E=0.23582 \text{ au} = 6.42 \text{ eV}$

H/L gap  
 $E=0.21972 \text{ au} = 5.98 \text{ eV}$

### Reaction 11

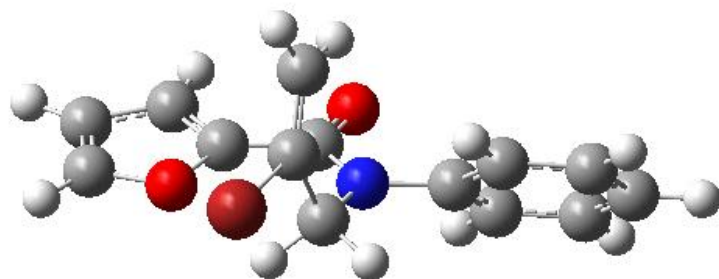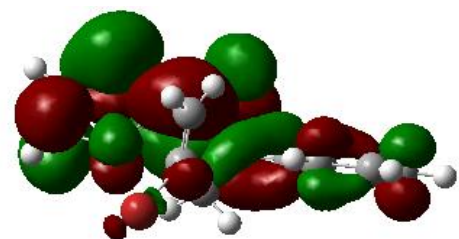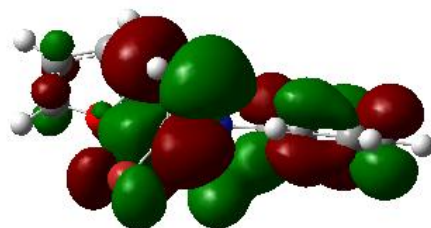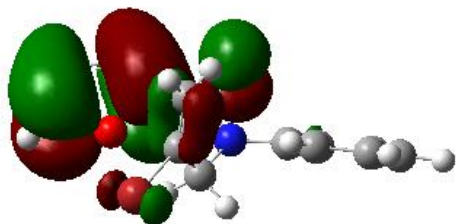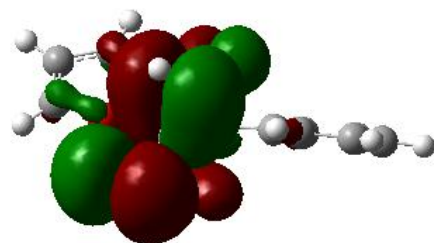

H/L gap  
 $E=0.23549 \text{ au} = 6.41 \text{ eV}$

H/L gap  
 $E= 0.21324 \text{ au} = 5.80 \text{ eV}$



### Reaction 1m

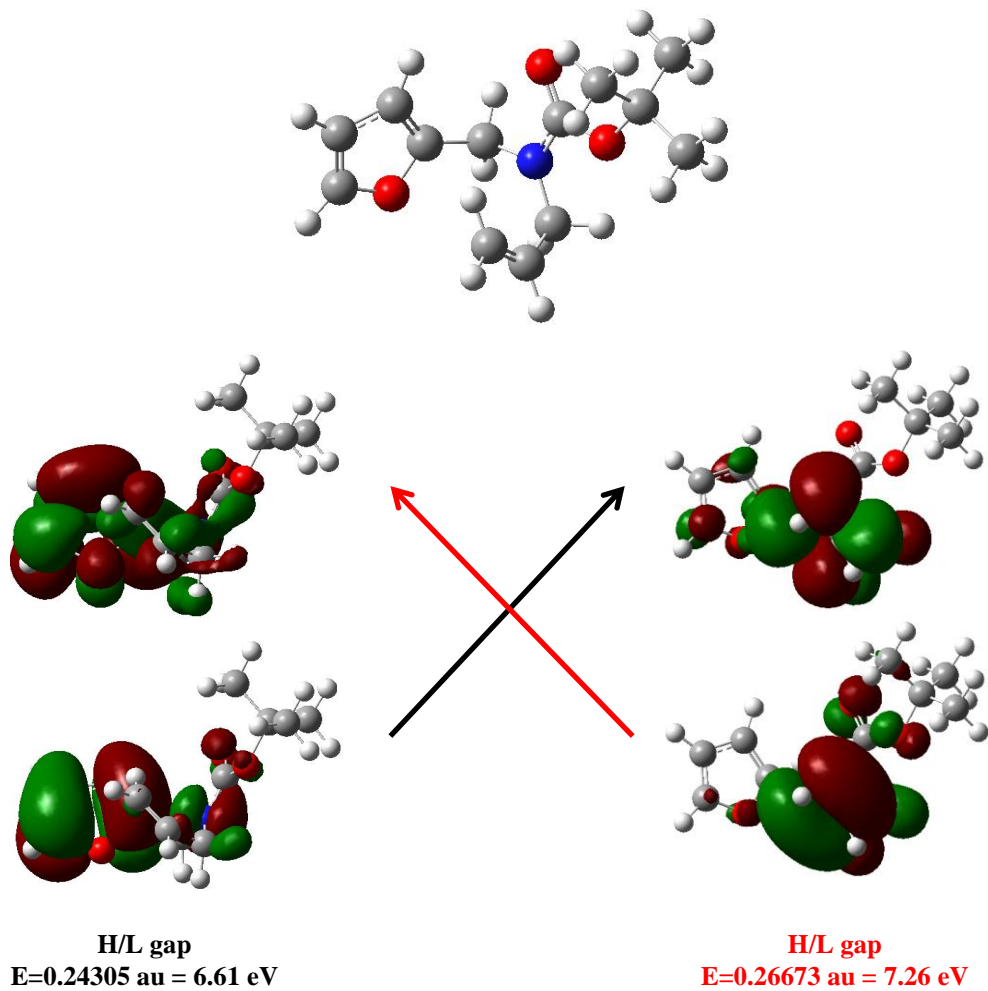



### Reaction 1n

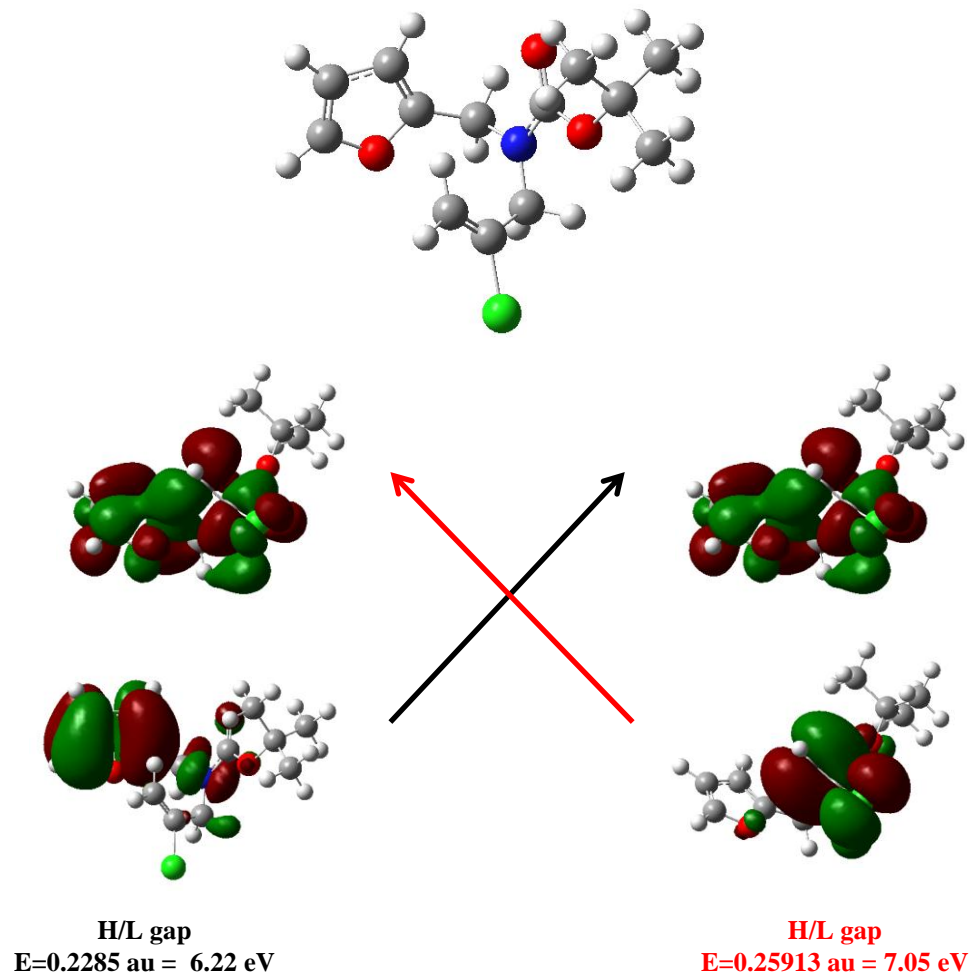

**Reaction 1a**

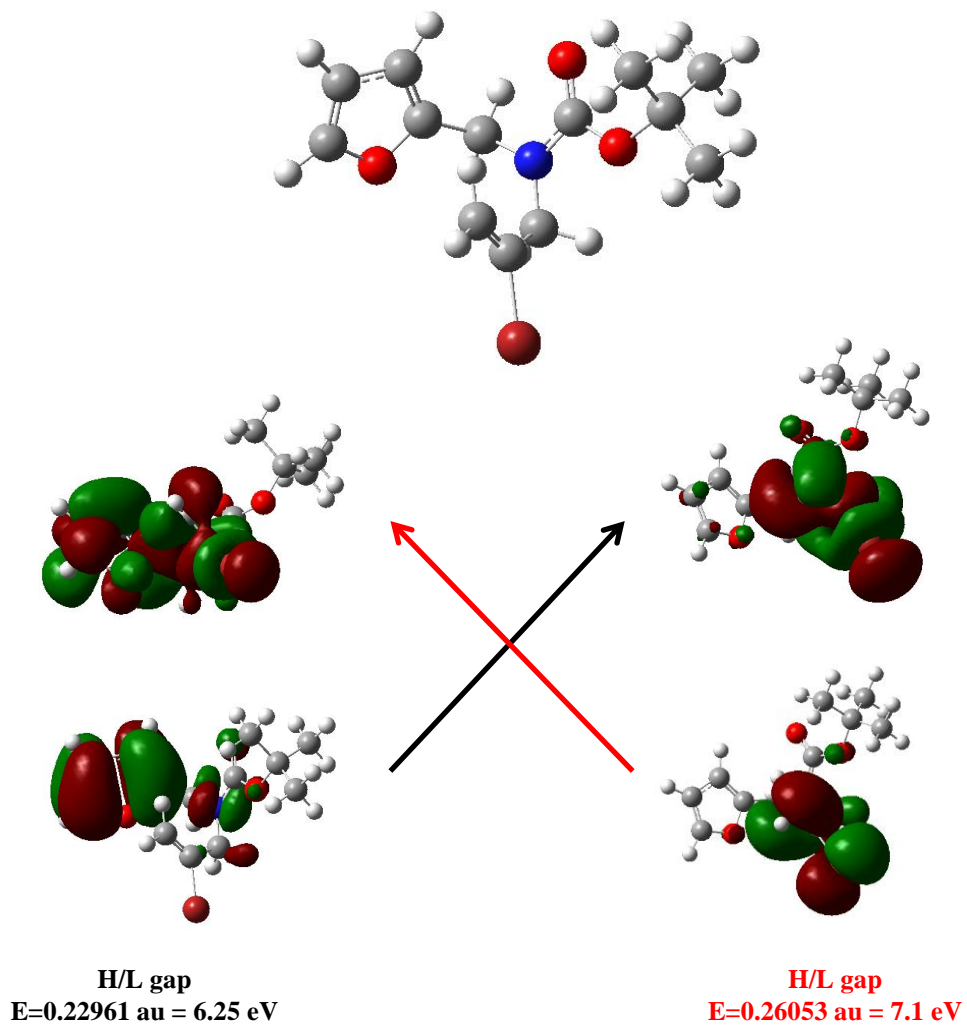

### Reaction 1p

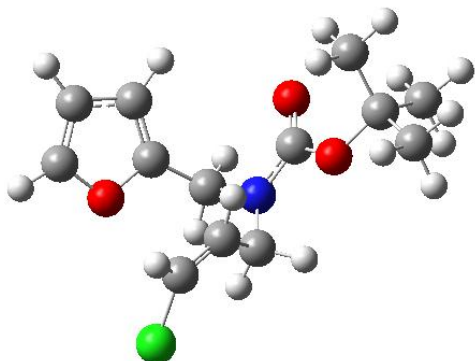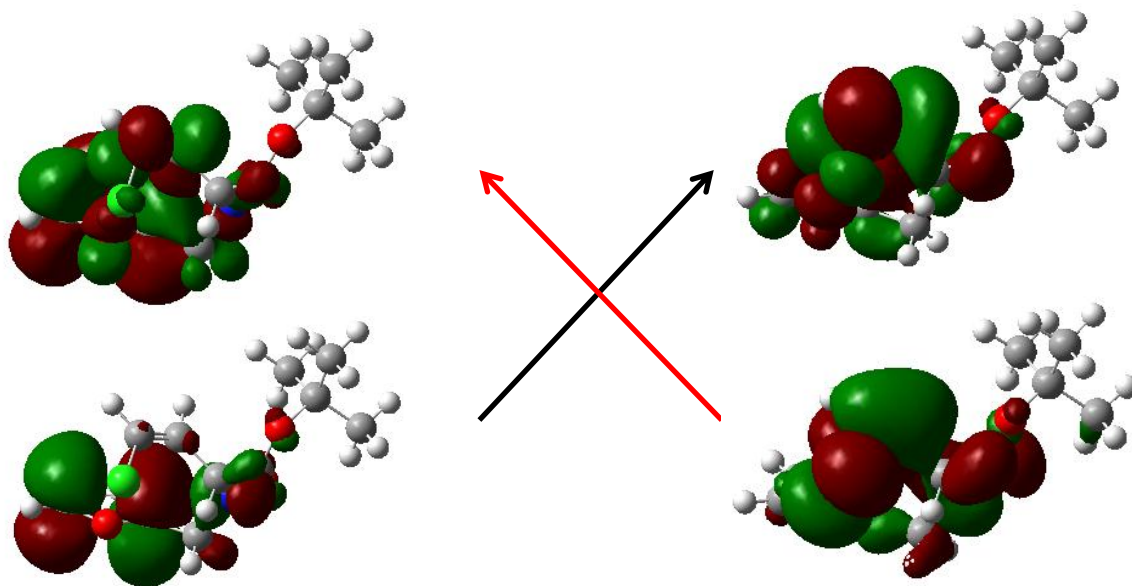

H/L gap  
 $E=0.21814 \text{ au} = 5.94 \text{ eV}$

H/L gap  
 $E=0.27387 \text{ au} = 7.45 \text{ eV}$

### Reaction 1q

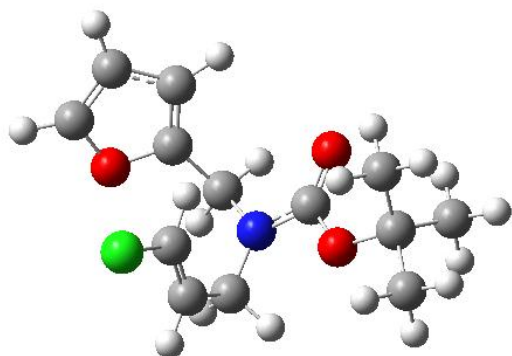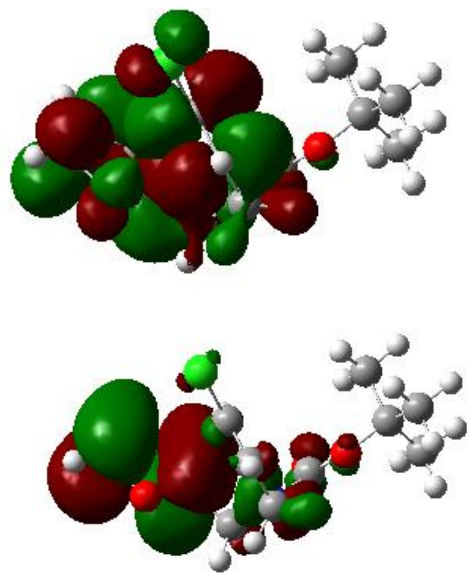

H/L gap  
 $E=0.22908 \text{ au} = 6.23 \text{ eV}$

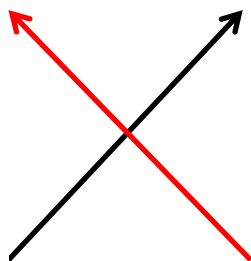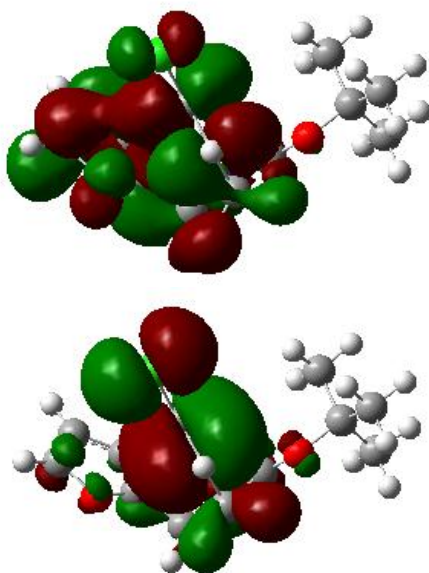

H/L gap  
 $E=0.2595 \text{ au} = 7.06 \text{ eV}$

**Reaction 1r**

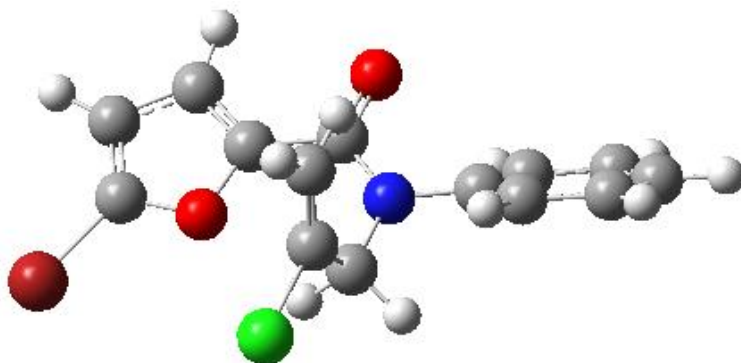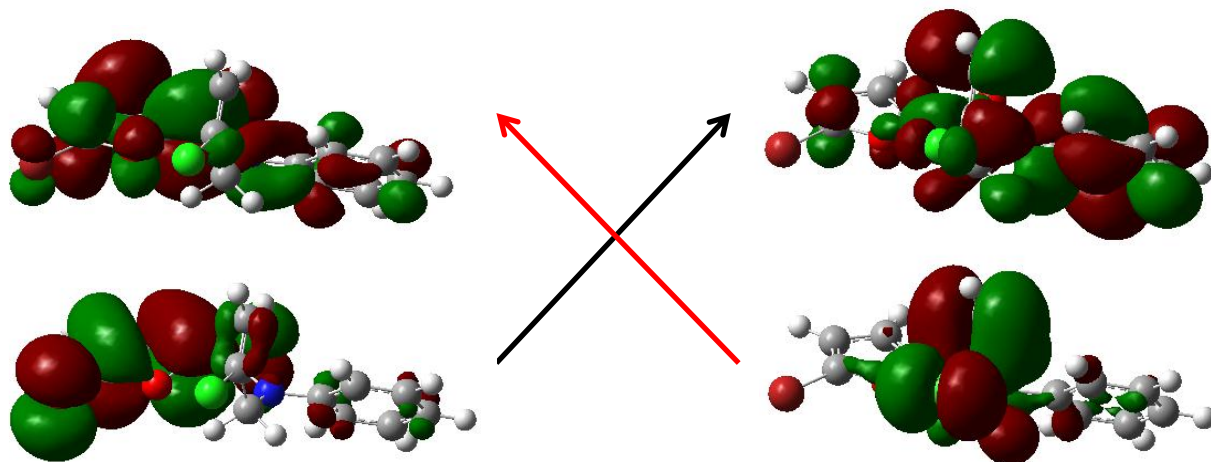

H/L gap  
E=0.23503 au = 6.40 eV

H/L gap  
E=0.21341 au = 5.81 eV

### Reaction 1s

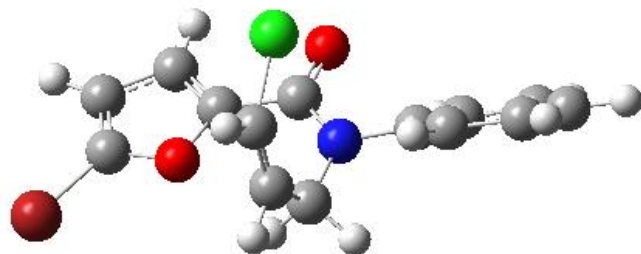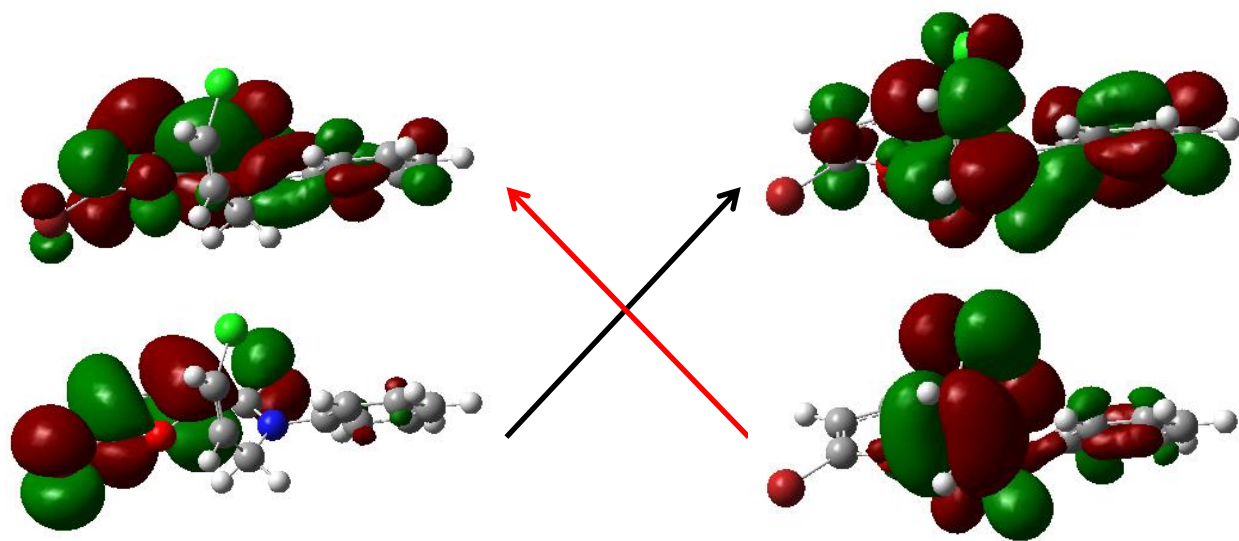

H/L gap  
 $E=0.23563 \text{ au} = 6.41 \text{ eV}$

H/L gap  
 $E=0.21534 \text{ au} = 5.86 \text{ eV}$

**Reaction 1t**

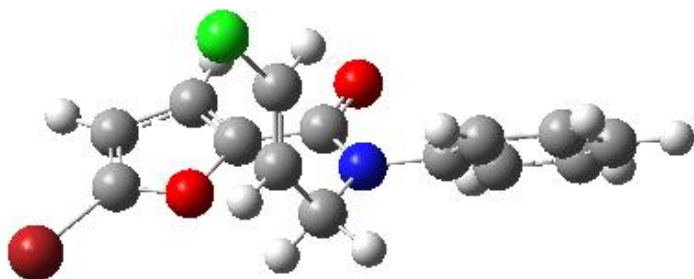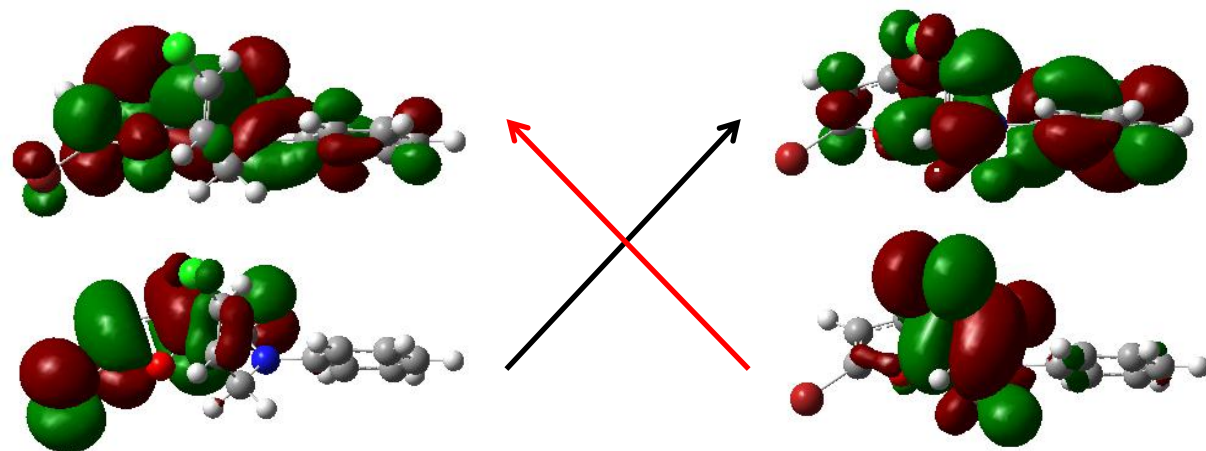

H/L gap  
 $E=0.23589 \text{ au} = 6.42 \text{ eV}$

H/L gap  
 $E=0.20876 \text{ au} = 5.68 \text{ eV}$



### Reaction 1u

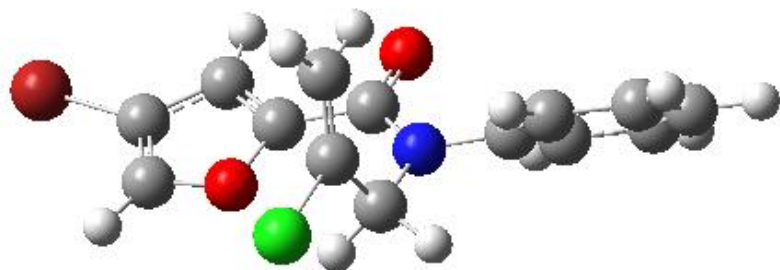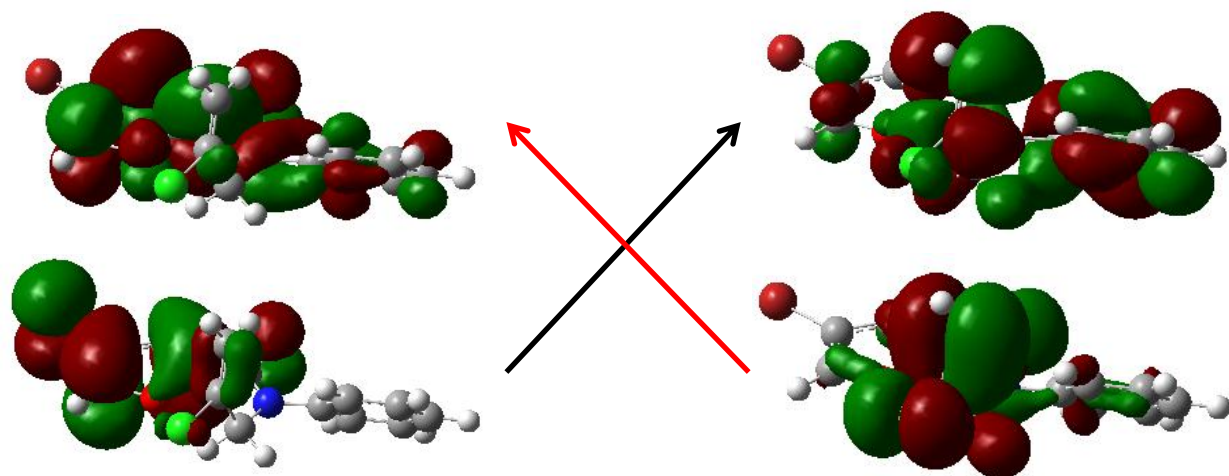

H/L gap  
 $E=0.23953 \text{ au} = 6.52 \text{ eV}$

H/L gap  
 $E=0.21344 \text{ au} = 5.81 \text{ eV}$



### Reaction 1v

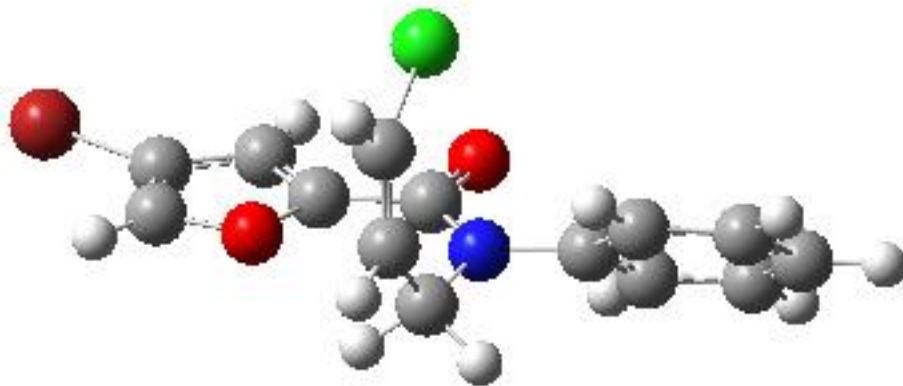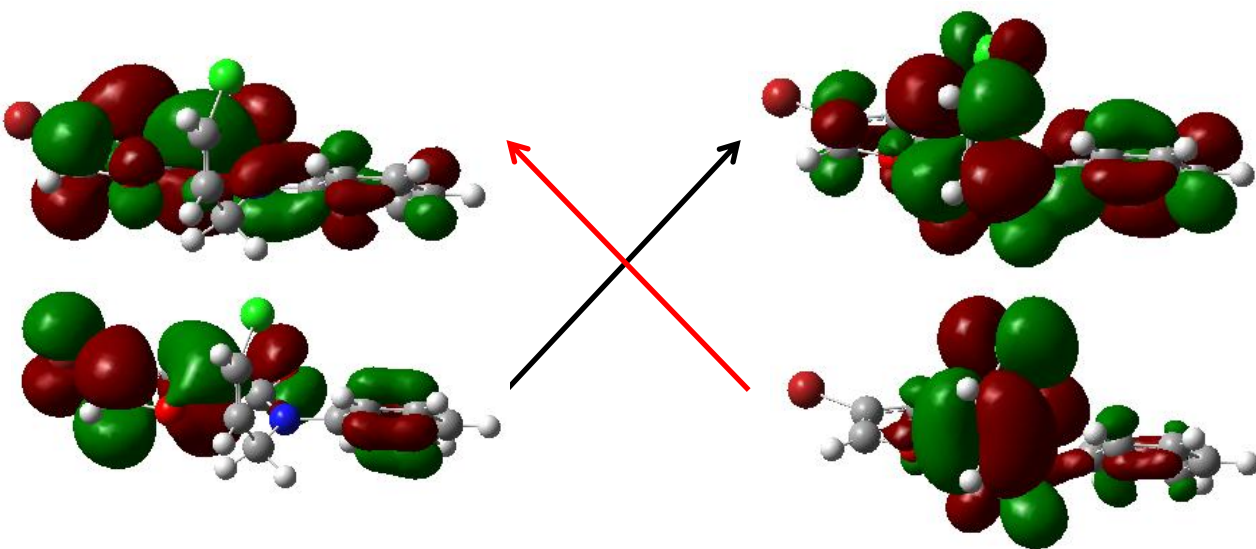

H/L gap  
 $E=0.23872 \text{ au} = 6.50 \text{ eV}$

H/L gap  
 $E=0.21573 \text{ au} = 5.87 \text{ eV}$

### Reaction 1w

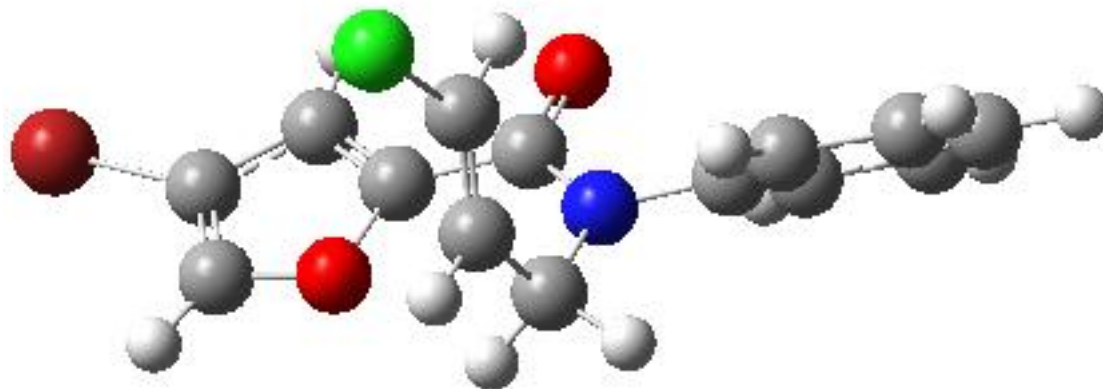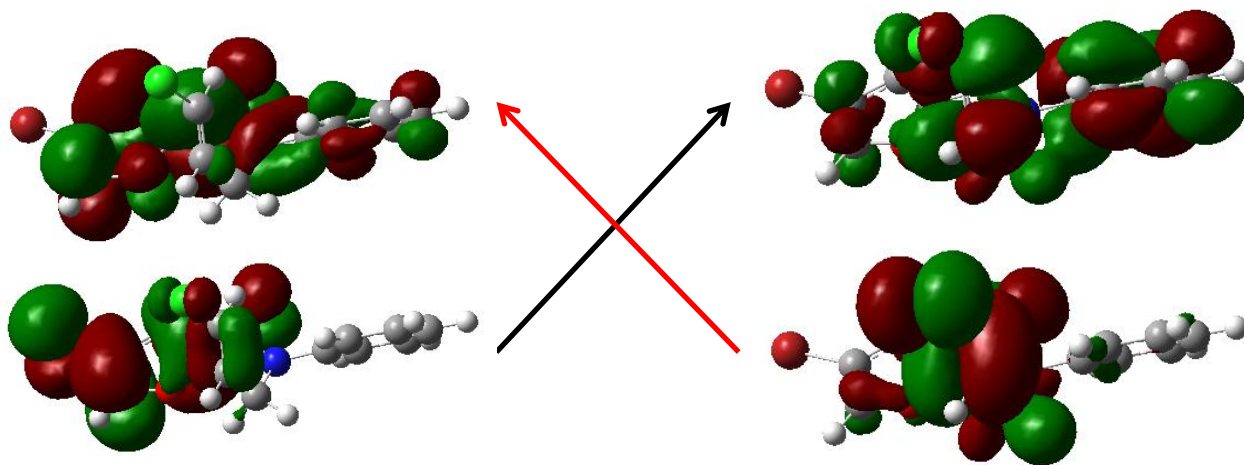

H/L gap  
 $E=0.2402 \text{ au} = 6.54 \text{ eV}$

H/L gap  
 $E=0.2087 \text{ au} = 5.68 \text{ eV}$

**Reaction 1x**

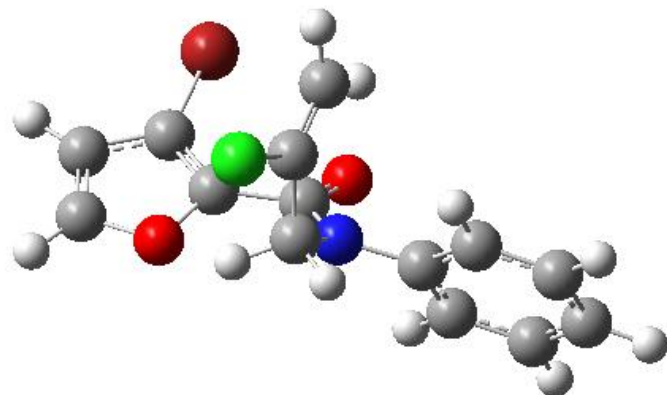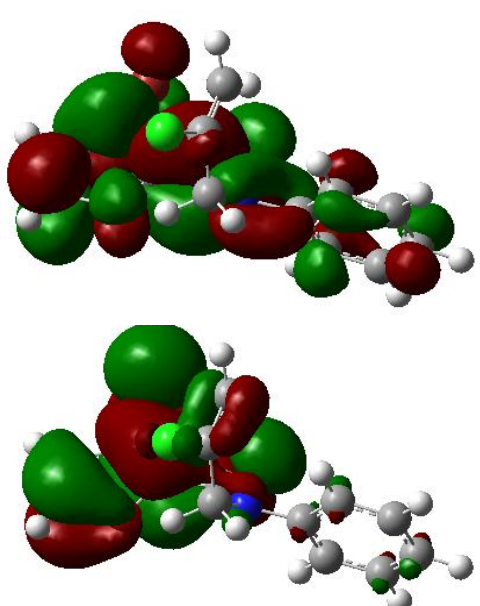

H/L gap  
 $E=0.23893 \text{ au} = 6.50 \text{ eV}$

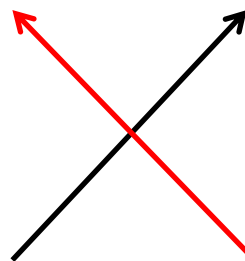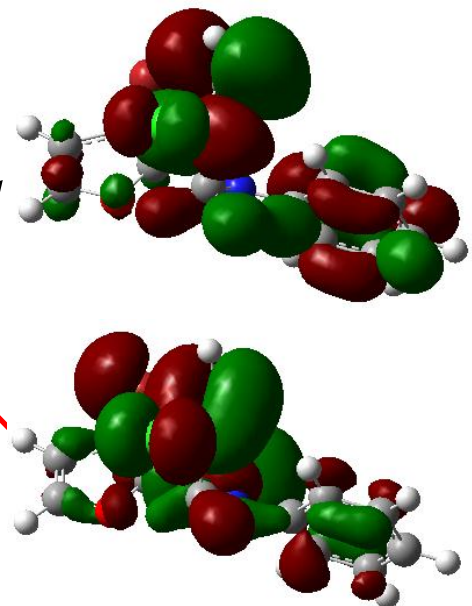

H/L gap  
 $E=0.20892 \text{ au} = 5.69 \text{ eV}$

### Reaction 1y

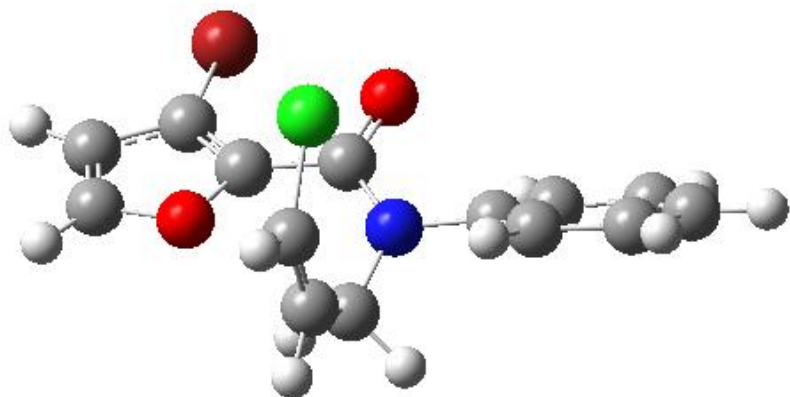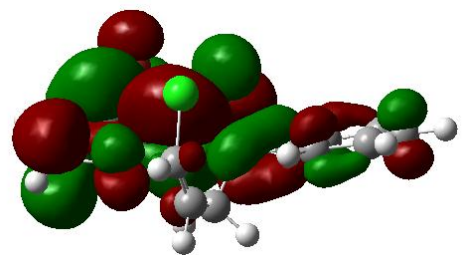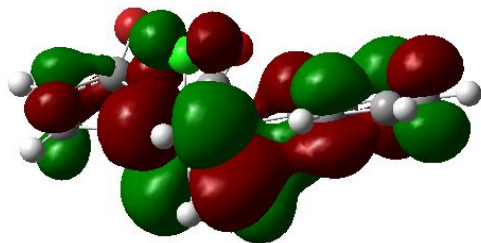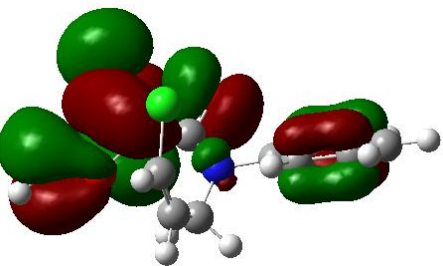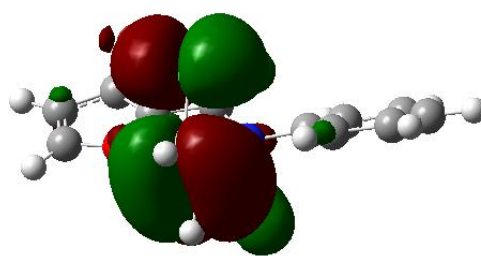

H/L gap  
 $E=0.23399 \text{ au} = 6.37 \text{ eV}$

H/L gap  
 $E=0.21482 \text{ au} = 5.85 \text{ eV}$

**Reaction 1z**

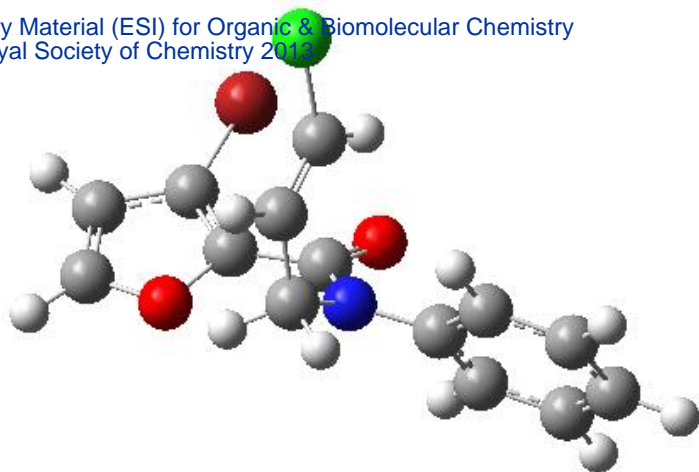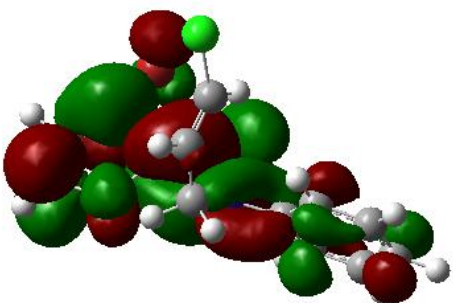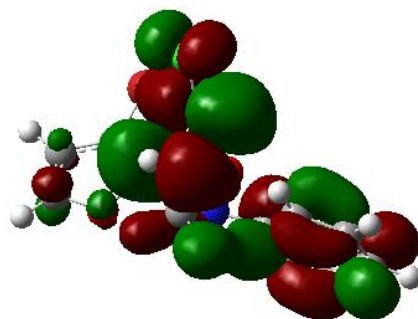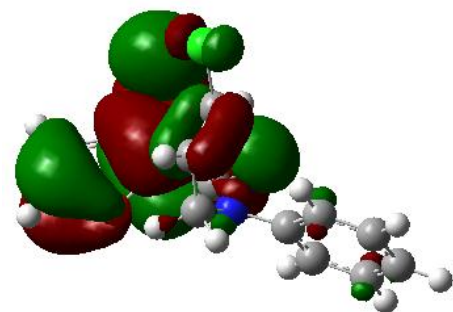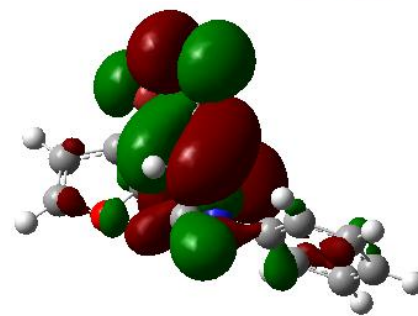

H/L gap  
 $E=0.23862 \text{ au} = 6.49 \text{ eV}$

H/L gap  
 $E=0.20565 \text{ au} = 5.60 \text{ eV}$
