# Supplementary material for: Halogenation effects in intramolecular furan Diels–Alder reactions: broad scope synthetic and computational studies
Source: Royal Society of Chemistry journal article supplement (doi:10.1039/c3ob41616j), 2013-01-01
Supplement: c3ob41616j_3.pdf [file c3ob41616j_3.pdf]

**Halogenation Effects in Intramolecular Furan Diels-Alder Reactions: Broad Scope  
Synthetic and Computational Studies**

Robert L. Rae, Justyna M. Żurek, Martin J. Paterson\* and Magnus W. P. Bebbington\*

Institute of Chemical Science, Heriot-Watt University, Edinburgh EH14 4AS, U.K.

Cartesian coordinates and absolute energy values for all starting materials, products and transition states for reactions **a-z**

## REACTION a

### 1a

E=-745.245226 au

|    |   |   |           |           |           |
|----|---|---|-----------|-----------|-----------|
| 1  | 6 | 0 | -1.916498 | 2.373880  | 1.398222  |
| 2  | 6 | 0 | -0.621319 | 1.897673  | 1.209336  |
| 3  | 6 | 0 | -0.299088 | 1.188829  | 0.055263  |
| 4  | 6 | 0 | -1.279170 | 0.962361  | -0.909391 |
| 5  | 6 | 0 | -2.576331 | 1.427701  | -0.718929 |
| 6  | 6 | 0 | -2.902744 | 2.130052  | 0.441383  |
| 7  | 1 | 0 | -2.160047 | 2.948630  | 2.284771  |
| 8  | 1 | 0 | 0.136480  | 2.092809  | 1.959710  |
| 9  | 1 | 0 | 0.709531  | 0.821386  | -0.095386 |
| 10 | 1 | 0 | -1.034688 | 0.418937  | -1.815083 |
| 11 | 1 | 0 | -3.332597 | 1.263619  | -1.474695 |
| 12 | 7 | 0 | -4.246815 | 2.596801  | 0.675530  |
| 13 | 6 | 0 | -4.765157 | 3.517758  | -0.218756 |
| 14 | 8 | 0 | -4.115460 | 3.923601  | -1.171886 |
| 15 | 8 | 0 | -7.011580 | 3.716599  | 0.934841  |
| 16 | 6 | 0 | -6.136842 | 4.064627  | -0.064114 |
| 17 | 6 | 0 | -5.806569 | 0.843856  | 1.599882  |
| 18 | 1 | 0 | -6.266000 | 0.441604  | 2.501357  |
| 19 | 6 | 0 | -6.039637 | 0.260361  | 0.431192  |
| 20 | 1 | 0 | -5.605646 | 0.630220  | -0.490127 |
| 21 | 1 | 0 | -6.679227 | -0.611080 | 0.357281  |
| 22 | 6 | 0 | -6.732443 | 4.977941  | -0.888580 |
| 23 | 1 | 0 | -6.266638 | 5.417677  | -1.754202 |
| 24 | 6 | 0 | -8.041343 | 5.205741  | -0.374790 |
| 25 | 1 | 0 | -8.797015 | 5.864779  | -0.771177 |
| 26 | 6 | 0 | -8.156027 | 4.416181  | 0.727307  |
| 27 | 1 | 0 | -8.945930 | 4.242317  | 1.438670  |
| 28 | 6 | 0 | -4.940904 | 2.053624  | 1.851497  |
| 29 | 1 | 0 | -5.538058 | 2.833341  | 2.323717  |
| 30 | 1 | 0 | -4.171431 | 1.780709  | 2.578267  |

### 2a

E=-745.255138 au

|   |   |   |           |           |           |
|---|---|---|-----------|-----------|-----------|
| 1 | 6 | 0 | 0.996813  | -0.045943 | -0.484048 |
| 2 | 6 | 0 | 0.631559  | 1.872901  | 0.371984  |
| 3 | 6 | 0 | 0.963865  | 0.847429  | -1.775818 |
| 4 | 1 | 0 | 1.931195  | 0.805486  | -2.280687 |
| 5 | 1 | 0 | 0.191456  | 0.545145  | -2.484141 |
| 6 | 6 | 0 | 0.700141  | 2.235887  | -1.141676 |
| 7 | 1 | 0 | -0.226099 | 2.696133  | -1.488561 |
| 8 | 1 | 0 | 1.546970  | -0.980405 | -0.564405 |

|    |   |   |           |           |           |
|----|---|---|-----------|-----------|-----------|
| 9  | 8 | 0 | 1.648966  | 0.849986  | 0.435324  |
| 10 | 6 | 0 | 1.054256  | 3.131892  | 1.107262  |
| 11 | 8 | 0 | 0.809010  | 3.394476  | 2.264888  |
| 12 | 6 | 0 | 1.834216  | 3.271463  | -1.144567 |
| 13 | 1 | 0 | 2.809002  | 2.792762  | -1.279464 |
| 14 | 1 | 0 | 1.707739  | 4.031575  | -1.917890 |
| 15 | 6 | 0 | 2.454936  | 5.099786  | 0.477411  |
| 16 | 6 | 0 | 2.196983  | 5.843747  | 1.640895  |
| 17 | 6 | 0 | 3.423576  | 5.567350  | -0.424298 |
| 18 | 6 | 0 | 2.896373  | 7.021741  | 1.878626  |
| 19 | 1 | 0 | 1.465706  | 5.487276  | 2.348495  |
| 20 | 6 | 0 | 4.111700  | 6.750556  | -0.171532 |
| 21 | 1 | 0 | 3.656799  | 5.007617  | -1.319954 |
| 22 | 6 | 0 | 3.853820  | 7.487162  | 0.979870  |
| 23 | 1 | 0 | 2.683946  | 7.582102  | 2.782361  |
| 24 | 1 | 0 | 4.857009  | 7.090336  | -0.882038 |
| 25 | 1 | 0 | 4.391472  | 8.407534  | 1.175502  |
| 26 | 7 | 0 | 1.753887  | 3.903005  | 0.189785  |
| 27 | 6 | 0 | -0.630933 | 1.088374  | 0.650745  |
| 28 | 6 | 0 | -0.414929 | -0.104913 | 0.094093  |
| 29 | 1 | 0 | -1.526928 | 1.480628  | 1.109435  |
| 30 | 1 | 0 | -1.104103 | -0.930934 | -0.015258 |

### TS a

E = -745.208573 au

|    |   |   |           |           |           |
|----|---|---|-----------|-----------|-----------|
| 1  | 6 | 0 | -3.526613 | -0.349515 | 0.872757  |
| 2  | 6 | 0 | -1.787411 | 0.644430  | 0.089394  |
| 3  | 6 | 0 | -2.751076 | -1.796492 | -0.559162 |
| 4  | 1 | 0 | -2.645407 | -2.569019 | 0.194686  |
| 5  | 1 | 0 | -3.570509 | -1.946603 | -1.250483 |
| 6  | 6 | 0 | -1.618501 | -1.076321 | -0.972426 |
| 7  | 1 | 0 | -1.597150 | -0.701834 | -1.991088 |
| 8  | 1 | 0 | -4.079558 | -0.884273 | 1.631064  |
| 9  | 8 | 0 | -2.233991 | -0.031691 | 1.206137  |
| 10 | 6 | 0 | -0.335574 | 1.036059  | 0.071575  |
| 11 | 8 | 0 | 0.039386  | 2.186726  | 0.192136  |
| 12 | 6 | 0 | -0.250506 | -1.349834 | -0.382839 |
| 13 | 1 | 0 | -0.353482 | -1.916150 | 0.548337  |
| 14 | 1 | 0 | 0.361509  | -1.939852 | -1.070066 |
| 15 | 6 | 0 | 1.879976  | -0.062467 | -0.042947 |
| 16 | 6 | 0 | 2.632083  | 1.090423  | -0.316362 |
| 17 | 6 | 0 | 2.551707  | -1.241317 | 0.313354  |
| 18 | 6 | 0 | 4.019922  | 1.048490  | -0.232487 |
| 19 | 1 | 0 | 2.127018  | 2.006967  | -0.575399 |
| 20 | 6 | 0 | 3.941177  | -1.268414 | 0.387608  |
| 21 | 1 | 0 | 1.994716  | -2.137942 | 0.550687  |

|    |   |   |           |           |           |
|----|---|---|-----------|-----------|-----------|
| 22 | 6 | 0 | 4.685339  | -0.124843 | 0.115182  |
| 23 | 1 | 0 | 4.584843  | 1.948707  | -0.447651 |
| 24 | 1 | 0 | 4.438611  | -2.190396 | 0.667190  |
| 25 | 1 | 0 | 5.767250  | -0.146577 | 0.174691  |
| 26 | 7 | 0 | 0.460964  | -0.072411 | -0.136713 |
| 27 | 6 | 0 | -2.900666 | 1.297876  | -0.499978 |
| 28 | 6 | 0 | -4.009345 | 0.642909  | -0.018440 |
| 29 | 1 | 0 | -2.844736 | 2.039938  | -1.281139 |
| 30 | 1 | 0 | -5.036077 | 0.757729  | -0.331402 |

## REACTION b

### 1b

E= -3317.529463 au

|    |    |   |           |           |           |
|----|----|---|-----------|-----------|-----------|
| 1  | 6  | 0 | 3.617365  | -1.093453 | 0.201004  |
| 2  | 6  | 0 | 5.002406  | -1.074959 | 0.049346  |
| 3  | 6  | 0 | 5.630878  | 0.016711  | -0.540949 |
| 4  | 6  | 0 | 4.860715  | 1.090629  | -0.985084 |
| 5  | 6  | 0 | 3.477513  | 1.075706  | -0.847549 |
| 6  | 6  | 0 | 2.845322  | -0.019654 | -0.250528 |
| 7  | 1  | 0 | 3.138803  | -1.938350 | 0.680557  |
| 8  | 1  | 0 | 5.587664  | -1.915469 | 0.405052  |
| 9  | 1  | 0 | 6.708847  | 0.033335  | -0.652888 |
| 10 | 1  | 0 | 5.338204  | 1.946848  | -1.448099 |
| 11 | 1  | 0 | 2.888100  | 1.914816  | -1.188436 |
| 12 | 7  | 0 | 1.411777  | -0.074457 | -0.150263 |
| 13 | 6  | 0 | 0.740652  | 1.025415  | 0.357518  |
| 14 | 8  | 0 | 1.326040  | 2.005982  | 0.794359  |
| 15 | 8  | 0 | -1.586716 | 0.150454  | -0.172746 |
| 16 | 6  | 0 | -2.861079 | 1.730409  | 0.781405  |
| 17 | 6  | 0 | -2.846063 | 0.568125  | 0.072683  |
| 18 | 6  | 0 | -1.491219 | 2.059752  | 0.989622  |
| 19 | 1  | 0 | -1.085059 | 2.913672  | 1.505407  |
| 20 | 6  | 0 | -0.742964 | 1.079687  | 0.401119  |
| 21 | 6  | 0 | 0.325357  | -2.220116 | 0.630721  |
| 22 | 1  | 0 | -0.206055 | -3.116809 | 0.317397  |
| 23 | 6  | 0 | 0.524858  | -1.994595 | 1.924320  |
| 24 | 1  | 0 | 1.043579  | -1.111760 | 2.281800  |
| 25 | 1  | 0 | 0.167842  | -2.690317 | 2.674294  |
| 26 | 6  | 0 | 0.761058  | -1.343041 | -0.516505 |
| 27 | 1  | 0 | 1.475984  | -1.890541 | -1.135894 |
| 28 | 1  | 0 | -0.095968 | -1.143576 | -1.160063 |
| 29 | 1  | 0 | -3.733782 | 2.271219  | 1.106385  |
| 30 | 35 | 0 | -4.231257 | -0.497344 | -0.597409 |

## 2b

E= -3317.545914 au

|    |    |   |           |           |           |
|----|----|---|-----------|-----------|-----------|
| 1  | 6  | 0 | 2.442250  | 0.095766  | 0.201601  |
| 2  | 6  | 0 | 0.539666  | 1.016512  | 0.307255  |
| 3  | 6  | 0 | 1.840083  | -0.666432 | 1.428758  |
| 4  | 1  | 0 | 1.766021  | -1.728864 | 1.195147  |
| 5  | 1  | 0 | 2.439216  | -0.544221 | 2.330517  |
| 6  | 6  | 0 | 0.453528  | 0.020705  | 1.502347  |
| 7  | 1  | 0 | 0.286213  | 0.540310  | 2.446865  |
| 8  | 8  | 0 | 1.294840  | 0.214025  | -0.638682 |
| 9  | 6  | 0 | -0.893211 | 1.224180  | -0.151365 |
| 10 | 8  | 0 | -1.295910 | 2.163099  | -0.802816 |
| 11 | 6  | 0 | -0.790628 | -0.794846 | 1.119147  |
| 12 | 1  | 0 | -0.525220 | -1.663345 | 0.508802  |
| 13 | 1  | 0 | -1.350163 | -1.137925 | 1.991178  |
| 14 | 6  | 0 | -2.973851 | -0.140080 | 0.041128  |
| 15 | 6  | 0 | -3.840918 | 0.839420  | -0.469796 |
| 16 | 6  | 0 | -3.469657 | -1.431843 | 0.273245  |
| 17 | 6  | 0 | -5.167974 | 0.518008  | -0.733200 |
| 18 | 1  | 0 | -3.466760 | 1.831252  | -0.666682 |
| 19 | 6  | 0 | -4.801730 | -1.734698 | 0.006830  |
| 20 | 1  | 0 | -2.820232 | -2.211404 | 0.647862  |
| 21 | 6  | 0 | -5.660726 | -0.763449 | -0.496843 |
| 22 | 1  | 0 | -5.823190 | 1.286429  | -1.128052 |
| 23 | 1  | 0 | -5.162294 | -2.740377 | 0.191518  |
| 24 | 1  | 0 | -6.697294 | -1.001325 | -0.704882 |
| 25 | 7  | 0 | -1.617554 | 0.148955  | 0.338196  |
| 26 | 6  | 0 | 1.515350  | 2.126449  | 0.626624  |
| 27 | 6  | 0 | 2.714898  | 1.545590  | 0.585717  |
| 28 | 1  | 0 | 1.249752  | 3.130183  | 0.925056  |
| 29 | 1  | 0 | 3.685041  | 1.943164  | 0.843693  |
| 30 | 35 | 0 | 3.894511  | -0.825579 | -0.710431 |

## TS b

E=-3317.495354 au

|   |   |   |           |           |           |
|---|---|---|-----------|-----------|-----------|
| 1 | 6 | 0 | 2.532740  | 0.253219  | 0.028759  |
| 2 | 6 | 0 | 0.575899  | 1.127350  | 0.087845  |
| 3 | 6 | 0 | 1.657334  | -0.627721 | 1.843171  |
| 4 | 1 | 0 | 1.813323  | -1.629291 | 1.459898  |
| 5 | 1 | 0 | 2.346453  | -0.321159 | 2.619436  |
| 6 | 6 | 0 | 0.392237  | -0.036018 | 1.758211  |
| 7 | 1 | 0 | 0.122106  | 0.706871  | 2.502418  |
| 8 | 8 | 0 | 1.307590  | 0.157687  | -0.573375 |
| 9 | 6 | 0 | -0.888599 | 1.213873  | -0.242465 |

|    |    |   |           |           |           |
|----|----|---|-----------|-----------|-----------|
| 10 | 8  | 0 | -1.358920 | 2.139743  | -0.874993 |
| 11 | 6  | 0 | -0.785850 | -0.771116 | 1.153577  |
| 12 | 1  | 0 | -0.431941 | -1.627738 | 0.571639  |
| 13 | 1  | 0 | -1.451021 | -1.145902 | 1.935692  |
| 14 | 6  | 0 | -2.938755 | -0.146984 | 0.017676  |
| 15 | 6  | 0 | -3.856915 | 0.856416  | -0.327017 |
| 16 | 6  | 0 | -3.383074 | -1.474554 | 0.101931  |
| 17 | 6  | 0 | -5.184066 | 0.523557  | -0.578323 |
| 18 | 1  | 0 | -3.524580 | 1.878608  | -0.409530 |
| 19 | 6  | 0 | -4.715429 | -1.790336 | -0.146784 |
| 20 | 1  | 0 | -2.690665 | -2.269795 | 0.343992  |
| 21 | 6  | 0 | -5.625009 | -0.794550 | -0.488724 |
| 22 | 1  | 0 | -5.880111 | 1.311459  | -0.843610 |
| 23 | 1  | 0 | -5.036341 | -2.823702 | -0.078748 |
| 24 | 1  | 0 | -6.661781 | -1.041909 | -0.684597 |
| 25 | 7  | 0 | -1.574945 | 0.147795  | 0.299294  |
| 26 | 6  | 0 | 1.469737  | 2.154849  | 0.482474  |
| 27 | 6  | 0 | 2.723423  | 1.592972  | 0.458761  |
| 28 | 1  | 0 | 1.176067  | 3.117201  | 0.872443  |
| 29 | 1  | 0 | 3.655822  | 2.006495  | 0.808466  |
| 30 | 35 | 0 | 3.890168  | -0.858882 | -0.700005 |

## REACTION c

### 1c

E= -3317.528415 au

|    |   |   |           |           |           |
|----|---|---|-----------|-----------|-----------|
| 1  | 6 | 0 | -4.008733 | 0.622760  | 0.354532  |
| 2  | 6 | 0 | -5.325887 | 0.186479  | 0.482810  |
| 3  | 6 | 0 | -5.675747 | -1.110358 | 0.120689  |
| 4  | 6 | 0 | -4.696445 | -1.968572 | -0.377398 |
| 5  | 6 | 0 | -3.382211 | -1.538160 | -0.518775 |
| 6  | 6 | 0 | -3.029225 | -0.235792 | -0.151401 |
| 7  | 1 | 0 | -3.741456 | 1.627124  | 0.659018  |
| 8  | 1 | 0 | -6.074626 | 0.864042  | 0.877495  |
| 9  | 1 | 0 | -6.699167 | -1.451187 | 0.226604  |
| 10 | 1 | 0 | -4.956312 | -2.981239 | -0.664480 |
| 11 | 1 | 0 | -2.627405 | -2.211331 | -0.899495 |
| 12 | 7 | 0 | -1.686135 | 0.242375  | -0.343445 |
| 13 | 6 | 0 | -0.634695 | -0.536242 | 0.109832  |
| 14 | 8 | 0 | -0.808072 | -1.571835 | 0.735020  |
| 15 | 8 | 0 | 1.185338  | 0.877241  | -0.953571 |
| 16 | 6 | 0 | 3.007311  | -0.101638 | -0.146523 |
| 17 | 6 | 0 | 2.542165  | 0.896397  | -0.945997 |
| 18 | 1 | 0 | 3.022194  | 1.654021  | -1.540331 |
| 19 | 6 | 0 | 1.875297  | -0.786834 | 0.374415  |
| 20 | 1 | 0 | 1.855020  | -1.635435 | 1.035911  |

|    |    |   |           |           |           |
|----|----|---|-----------|-----------|-----------|
| 21 | 6  | 0 | 0.780836  | -0.152551 | -0.142528 |
| 22 | 6  | 0 | -1.203646 | 2.698801  | 0.014254  |
| 23 | 1  | 0 | -1.035508 | 3.656212  | -0.475694 |
| 24 | 6  | 0 | -1.110370 | 2.613588  | 1.336365  |
| 25 | 1  | 0 | -1.266090 | 1.679554  | 1.865148  |
| 26 | 1  | 0 | -0.869582 | 3.482409  | 1.937277  |
| 27 | 6  | 0 | -1.528729 | 1.578052  | -0.941765 |
| 28 | 1  | 0 | -2.469382 | 1.802542  | -1.451122 |
| 29 | 1  | 0 | -0.769503 | 1.541955  | -1.723099 |
| 30 | 35 | 0 | 4.821632  | -0.490403 | 0.196978  |

## 2c

E= -3317.544072 au

|    |    |   |           |           |           |
|----|----|---|-----------|-----------|-----------|
| 1  | 6  | 0 | 2.048327  | 0.929539  | 0.905392  |
| 2  | 6  | 0 | 0.488715  | -0.255909 | 0.059311  |
| 3  | 6  | 0 | 1.444827  | 1.940231  | -0.129865 |
| 4  | 1  | 0 | 1.058931  | 2.816060  | 0.395144  |
| 5  | 1  | 0 | 2.171870  | 2.272848  | -0.871368 |
| 6  | 6  | 0 | 0.309863  | 1.072589  | -0.730225 |
| 7  | 1  | 0 | 0.416035  | 0.918254  | -1.804786 |
| 8  | 1  | 0 | 2.606915  | 1.352503  | 1.735761  |
| 9  | 8  | 0 | 0.860803  | 0.263837  | 1.359030  |
| 10 | 6  | 0 | -0.886248 | -0.900958 | 0.085702  |
| 11 | 8  | 0 | -1.113541 | -2.074736 | 0.282682  |
| 12 | 6  | 0 | -1.146728 | 1.424276  | -0.391580 |
| 13 | 1  | 0 | -1.209422 | 2.037136  | 0.512879  |
| 14 | 1  | 0 | -1.650465 | 1.949548  | -1.205071 |
| 15 | 6  | 0 | -3.206600 | -0.000482 | -0.097648 |
| 16 | 6  | 0 | -3.847807 | -1.249795 | -0.133294 |
| 17 | 6  | 0 | -3.988684 | 1.160662  | -0.001642 |
| 18 | 6  | 0 | -5.235429 | -1.316667 | -0.074572 |
| 19 | 1  | 0 | -3.257302 | -2.149827 | -0.193787 |
| 20 | 6  | 0 | -5.376734 | 1.074720  | 0.052515  |
| 21 | 1  | 0 | -3.522587 | 2.135515  | 0.044862  |
| 22 | 6  | 0 | -6.010807 | -0.162788 | 0.016080  |
| 23 | 1  | 0 | -5.713058 | -2.289704 | -0.102769 |
| 24 | 1  | 0 | -5.960016 | 1.985522  | 0.128702  |
| 25 | 1  | 0 | -7.091640 | -0.227950 | 0.059507  |
| 26 | 7  | 0 | -1.795385 | 0.114379  | -0.169272 |
| 27 | 6  | 0 | 1.753301  | -0.958601 | -0.386407 |
| 28 | 6  | 0 | 2.722408  | -0.199411 | 0.123905  |
| 29 | 1  | 0 | 1.815160  | -1.804165 | -1.053730 |
| 30 | 35 | 0 | 4.586136  | -0.304390 | -0.153719 |

## TS c

E= -3317.495300 au

|    |    |   |           |           |           |
|----|----|---|-----------|-----------|-----------|
| 1  | 6  | 0 | 2.140742  | 0.749531  | 1.084735  |
| 2  | 6  | 0 | 0.528590  | -0.421882 | 0.264859  |
| 3  | 6  | 0 | 1.333145  | 2.070345  | -0.447976 |
| 4  | 1  | 0 | 1.133595  | 2.857818  | 0.270495  |
| 5  | 1  | 0 | 2.182395  | 2.247655  | -1.095960 |
| 6  | 6  | 0 | 0.280490  | 1.257595  | -0.889514 |
| 7  | 1  | 0 | 0.345683  | 0.833115  | -1.886228 |
| 8  | 1  | 0 | 2.627734  | 1.344929  | 1.841912  |
| 9  | 8  | 0 | 0.865284  | 0.334582  | 1.368477  |
| 10 | 6  | 0 | -0.888507 | -0.919860 | 0.189975  |
| 11 | 8  | 0 | -1.179268 | -2.090682 | 0.342179  |
| 12 | 6  | 0 | -1.132478 | 1.435458  | -0.376311 |
| 13 | 1  | 0 | -1.125138 | 2.047822  | 0.531054  |
| 14 | 1  | 0 | -1.755201 | 1.941579  | -1.118576 |
| 15 | 6  | 0 | -3.170695 | -0.002733 | -0.076515 |
| 16 | 6  | 0 | -3.817116 | -1.222163 | -0.329211 |
| 17 | 6  | 0 | -3.947268 | 1.133775  | 0.193222  |
| 18 | 6  | 0 | -5.206485 | -1.286936 | -0.308838 |
| 19 | 1  | 0 | -3.231945 | -2.106397 | -0.523033 |
| 20 | 6  | 0 | -5.336644 | 1.053801  | 0.203854  |
| 21 | 1  | 0 | -3.474081 | 2.081555  | 0.412666  |
| 22 | 6  | 0 | -5.976148 | -0.156095 | -0.046629 |
| 23 | 1  | 0 | -5.689138 | -2.237657 | -0.505901 |
| 24 | 1  | 0 | -5.916625 | 1.944816  | 0.416540  |
| 25 | 1  | 0 | -7.058069 | -0.217653 | -0.036010 |
| 26 | 7  | 0 | -1.752166 | 0.115054  | -0.104767 |
| 27 | 6  | 0 | 1.709581  | -1.009558 | -0.250868 |
| 28 | 6  | 0 | 2.729324  | -0.245099 | 0.262480  |
| 29 | 1  | 0 | 1.759217  | -1.779059 | -1.003973 |
| 30 | 35 | 0 | 4.557126  | -0.295205 | -0.202698 |

## REACTION d

### 1d

E= -3317.527662 au

|   |   |   |           |           |           |
|---|---|---|-----------|-----------|-----------|
| 1 | 6 | 0 | -3.426617 | 0.349837  | 0.707145  |
| 2 | 6 | 0 | -4.688432 | -0.241558 | 0.728783  |
| 3 | 6 | 0 | -5.014795 | -1.238277 | -0.184751 |
| 4 | 6 | 0 | -4.067878 | -1.637596 | -1.127355 |
| 5 | 6 | 0 | -2.811755 | -1.044628 | -1.163679 |
| 6 | 6 | 0 | -2.481191 | -0.043951 | -0.243610 |
| 7 | 1 | 0 | -3.173997 | 1.106006  | 1.439882  |
| 8 | 1 | 0 | -5.411009 | 0.074763  | 1.472660  |
| 9 | 1 | 0 | -5.994197 | -1.701988 | -0.162904 |



|    |    |   |           |           |           |
|----|----|---|-----------|-----------|-----------|
| 10 | 1  | 0 | -4.309429 | -2.413057 | -1.845507 |
| 11 | 1  | 0 | -2.082052 | -1.361857 | -1.895662 |
| 12 | 7  | 0 | -1.203275 | 0.607358  | -0.311494 |
| 13 | 6  | 0 | -0.061686 | -0.180509 | -0.386713 |
| 14 | 8  | 0 | -0.085946 | -1.391010 | -0.244934 |
| 15 | 8  | 0 | 1.350228  | 1.594710  | -1.425922 |
| 16 | 6  | 0 | 2.668525  | 1.887823  | -1.567033 |
| 17 | 1  | 0 | 2.895973  | 2.753838  | -2.165426 |
| 18 | 6  | 0 | 2.518357  | 0.055244  | -0.326168 |
| 19 | 6  | 0 | 1.251101  | 0.463508  | -0.653737 |
| 20 | 6  | 0 | -0.736483 | 2.509034  | 1.287301  |
| 21 | 1  | 0 | -0.675941 | 3.590745  | 1.395704  |
| 22 | 6  | 0 | -0.436377 | 1.729683  | 2.320404  |
| 23 | 1  | 0 | -0.481045 | 0.647796  | 2.260246  |
| 24 | 1  | 0 | -0.131800 | 2.154066  | 3.269691  |
| 25 | 6  | 0 | -1.164888 | 2.061714  | -0.088503 |
| 26 | 1  | 0 | -2.170940 | 2.436461  | -0.293733 |
| 27 | 1  | 0 | -0.520791 | 2.527897  | -0.833457 |
| 28 | 35 | 0 | 3.031317  | -1.421273 | 0.718609  |
| 29 | 6  | 0 | 3.434042  | 0.982649  | -0.907293 |
| 30 | 1  | 0 | 4.508632  | 0.958241  | -0.837026 |

## 2d

E= -3317.542566 au

|    |    |   |           |           |           |
|----|----|---|-----------|-----------|-----------|
| 1  | 6  | 0 | 2.247204  | 2.196900  | 0.789720  |
| 2  | 6  | 0 | 0.991454  | 0.526969  | 0.349928  |
| 3  | 6  | 0 | 1.574374  | 2.679082  | -0.544146 |
| 4  | 1  | 0 | 0.981907  | 3.576850  | -0.355839 |
| 5  | 1  | 0 | 2.297774  | 2.900524  | -1.329639 |
| 6  | 6  | 0 | 0.684149  | 1.451337  | -0.862550 |
| 7  | 1  | 0 | 0.941970  | 0.970135  | -1.806849 |
| 8  | 1  | 0 | 2.617332  | 2.977697  | 1.449684  |
| 9  | 8  | 0 | 1.144774  | 1.497626  | 1.401035  |
| 10 | 6  | 0 | -2.651097 | -0.019824 | -0.067586 |
| 11 | 6  | 0 | -3.065342 | -1.305120 | 0.318993  |
| 12 | 6  | 0 | -3.622561 | 0.923039  | -0.437041 |
| 13 | 6  | 0 | -4.419096 | -1.621915 | 0.328608  |
| 14 | 1  | 0 | -2.329680 | -2.034107 | 0.618543  |
| 15 | 6  | 0 | -4.973227 | 0.587120  | -0.424595 |
| 16 | 1  | 0 | -3.335780 | 1.925648  | -0.724075 |
| 17 | 6  | 0 | -5.382255 | -0.686213 | -0.042613 |
| 18 | 1  | 0 | -4.719878 | -2.618992 | 0.630421  |
| 19 | 1  | 0 | -5.705795 | 1.332941  | -0.712262 |
| 20 | 1  | 0 | -6.434434 | -0.945385 | -0.032309 |
| 21 | 7  | 0 | -1.280084 | 0.338678  | -0.107534 |
| 22 | 6  | 0 | 2.412740  | 0.006907  | 0.216672  |
| 23 | 35 | 0 | 2.878433  | -1.693969 | -0.444302 |

|    |   |   |           |           |           |
|----|---|---|-----------|-----------|-----------|
| 24 | 6 | 0 | 3.202977  | 1.052471  | 0.463432  |
| 25 | 1 | 0 | 4.275168  | 1.125793  | 0.358141  |
| 26 | 6 | 0 | -0.254028 | -0.320783 | 0.554223  |
| 27 | 6 | 0 | -0.840076 | 1.595524  | -0.746849 |
| 28 | 1 | 0 | -1.113705 | 2.452962  | -0.123851 |
| 29 | 1 | 0 | -1.323496 | 1.702737  | -1.719555 |
| 30 | 8 | 0 | -0.315681 | -1.352827 | 1.183182  |

### TS d

E= -3317.495465 au

|    |    |   |           |           |           |
|----|----|---|-----------|-----------|-----------|
| 1  | 6  | 0 | 2.392028  | 2.082167  | 0.990946  |
| 2  | 6  | 0 | 1.051199  | 0.448099  | 0.559592  |
| 3  | 6  | 0 | 1.511459  | 2.616746  | -0.983365 |
| 4  | 1  | 0 | 1.109936  | 3.553869  | -0.613832 |
| 5  | 1  | 0 | 2.379572  | 2.708980  | -1.622804 |
| 6  | 6  | 0 | 0.671636  | 1.499632  | -1.103637 |
| 7  | 1  | 0 | 0.911300  | 0.765652  | -1.868110 |
| 8  | 1  | 0 | 2.681841  | 2.990848  | 1.497234  |
| 9  | 8  | 0 | 1.168077  | 1.575767  | 1.345826  |
| 10 | 6  | 0 | -2.609230 | 0.001539  | -0.035602 |
| 11 | 6  | 0 | -3.016766 | -1.326390 | 0.160807  |
| 12 | 6  | 0 | -3.583551 | 0.988102  | -0.243947 |
| 13 | 6  | 0 | -4.370669 | -1.644368 | 0.144257  |
| 14 | 1  | 0 | -2.278101 | -2.091693 | 0.337465  |
| 15 | 6  | 0 | -4.934381 | 0.653166  | -0.262540 |
| 16 | 1  | 0 | -3.295951 | 2.022584  | -0.377030 |
| 17 | 6  | 0 | -5.337383 | -0.664242 | -0.068941 |
| 18 | 1  | 0 | -4.668531 | -2.675715 | 0.296561  |
| 19 | 1  | 0 | -5.671194 | 1.432117  | -0.423398 |
| 20 | 1  | 0 | -6.389505 | -0.923794 | -0.082074 |
| 21 | 7  | 0 | -1.233550 | 0.365371  | -0.051292 |
| 22 | 6  | 0 | 2.370960  | -0.041941 | 0.348728  |
| 23 | 35 | 0 | 2.795471  | -1.685677 | -0.464589 |
| 24 | 6  | 0 | 3.221459  | 1.012840  | 0.583328  |
| 25 | 1  | 0 | 4.279745  | 1.065221  | 0.382805  |
| 26 | 6  | 0 | -0.256028 | -0.296218 | 0.662275  |
| 27 | 6  | 0 | -0.803941 | 1.586083  | -0.771071 |
| 28 | 1  | 0 | -0.997203 | 2.475882  | -0.162916 |
| 29 | 1  | 0 | -1.403259 | 1.662680  | -1.681614 |
| 30 | 8  | 0 | -0.381330 | -1.330370 | 1.285723  |

### REACTION e

1e

E=-745.244017 au

|    |   |   |           |           |           |
|----|---|---|-----------|-----------|-----------|
| 1  | 6 | 0 | 1.780326  | -0.495510 | 1.010028  |
| 2  | 6 | 0 | 3.035696  | -1.091712 | 1.082757  |
| 3  | 6 | 0 | 3.928758  | -0.991105 | 0.017432  |
| 4  | 6 | 0 | 3.564801  | -0.279701 | -1.122987 |
| 5  | 6 | 0 | 2.314283  | 0.329343  | -1.194789 |
| 6  | 6 | 0 | 1.415780  | 0.216045  | -0.133109 |
| 7  | 1 | 0 | 1.088179  | -0.567432 | 1.837371  |
| 8  | 1 | 0 | 3.315552  | -1.639658 | 1.975419  |
| 9  | 1 | 0 | 4.904202  | -1.460156 | 0.078259  |
| 10 | 1 | 0 | 4.256178  | -0.187376 | -1.952959 |
| 11 | 1 | 0 | 2.034067  | 0.903876  | -2.070854 |
| 12 | 7 | 0 | 0.116974  | 0.827465  | -0.257703 |
| 13 | 8 | 0 | -1.151391 | -2.005665 | -0.175431 |
| 14 | 6 | 0 | -3.329173 | -2.125626 | 0.309218  |
| 15 | 1 | 0 | -4.279161 | -2.497151 | 0.658700  |
| 16 | 6 | 0 | -2.138929 | -2.775712 | 0.361620  |
| 17 | 1 | 0 | -1.833344 | -3.741356 | 0.727018  |
| 18 | 6 | 0 | -3.060611 | -0.856822 | -0.300982 |
| 19 | 1 | 0 | -3.765393 | -0.066549 | -0.505112 |
| 20 | 6 | 0 | -1.726810 | -0.831193 | -0.575952 |
| 21 | 6 | 0 | -1.576892 | 2.487404  | 0.494897  |
| 22 | 1 | 0 | -2.215475 | 2.476548  | 1.372514  |
| 23 | 6 | 0 | -1.863263 | 3.269827  | -0.542129 |
| 24 | 1 | 0 | -1.210147 | 3.341436  | -1.406022 |
| 25 | 1 | 0 | -2.749758 | 3.894030  | -0.549569 |
| 26 | 6 | 0 | -0.279296 | 1.754663  | 0.691029  |
| 27 | 8 | 0 | 0.396129  | 2.038980  | 1.663613  |
| 28 | 6 | 0 | -0.835296 | 0.191258  | -1.199783 |
| 29 | 1 | 0 | -0.236725 | -0.270768 | -1.986155 |
| 30 | 1 | 0 | -1.461149 | 0.948836  | -1.663643 |

## 2e

E=-745.262361 au

|    |   |   |          |           |           |
|----|---|---|----------|-----------|-----------|
| 1  | 6 | 0 | 1.068474 | 0.041085  | -0.464541 |
| 2  | 6 | 0 | 0.554207 | 1.966623  | 0.310005  |
| 3  | 6 | 0 | 1.000832 | 0.874797  | -1.791988 |
| 4  | 1 | 0 | 1.980857 | 0.914302  | -2.268915 |
| 5  | 1 | 0 | 0.278357 | 0.485215  | -2.509913 |
| 6  | 6 | 0 | 0.607443 | 2.253592  | -1.217869 |
| 7  | 1 | 0 | 1.684863 | -0.853807 | -0.496058 |
| 8  | 8 | 0 | 1.630994 | 1.016628  | 0.428372  |
| 9  | 6 | 0 | 2.439505 | 5.142017  | 0.293381  |
| 10 | 6 | 0 | 2.233054 | 5.749793  | 1.542499  |
| 11 | 6 | 0 | 3.375193 | 5.711409  | -0.587327 |
| 12 | 6 | 0 | 2.943295 | 6.891798  | 1.901105  |
| 13 | 1 | 0 | 1.514892 | 5.343299  | 2.241623  |
| 14 | 6 | 0 | 4.073646 | 6.853763  | -0.212508 |

|    |   |   |           |           |           |
|----|---|---|-----------|-----------|-----------|
| 15 | 1 | 0 | 3.539566  | 5.257766  | -1.551105 |
| 16 | 6 | 0 | 3.868859  | 7.453360  | 1.028159  |
| 17 | 1 | 0 | 2.764726  | 7.341163  | 2.871688  |
| 18 | 1 | 0 | 4.792183  | 7.276302  | -0.906217 |
| 19 | 1 | 0 | 4.421480  | 8.342220  | 1.309162  |
| 20 | 7 | 0 | 1.703426  | 3.979478  | -0.041568 |
| 21 | 6 | 0 | 1.634264  | 3.377828  | -1.296344 |
| 22 | 6 | 0 | 0.906458  | 3.274555  | 0.977786  |
| 23 | 1 | 0 | 0.007613  | 3.842688  | 1.243814  |
| 24 | 1 | 0 | 1.497138  | 3.103381  | 1.879939  |
| 25 | 8 | 0 | 2.246171  | 3.702134  | -2.291976 |
| 26 | 1 | 0 | -0.336338 | 2.633698  | -1.617729 |
| 27 | 6 | 0 | -0.660360 | 1.100437  | 0.595169  |
| 28 | 1 | 0 | -1.606009 | 1.440519  | 0.994607  |
| 29 | 6 | 0 | -0.348278 | -0.095909 | 0.092169  |
| 30 | 1 | 0 | -0.980748 | -0.967541 | -0.005191 |

### TS e

E=-745.211434 au

|    |   |   |           |           |           |
|----|---|---|-----------|-----------|-----------|
| 1  | 6 | 0 | 3.396962  | -0.035382 | 1.103463  |
| 2  | 6 | 0 | 1.769355  | -0.914847 | -0.001409 |
| 3  | 6 | 0 | 2.764928  | 1.605664  | -0.256661 |
| 4  | 1 | 0 | 2.532037  | 2.283395  | 0.555600  |
| 5  | 1 | 0 | 3.672201  | 1.826893  | -0.803171 |
| 6  | 6 | 0 | 1.721746  | 0.918512  | -0.883463 |
| 7  | 1 | 0 | 1.835122  | 0.640045  | -1.927561 |
| 8  | 1 | 0 | 3.843379  | 0.420005  | 1.974265  |
| 9  | 8 | 0 | 2.080529  | -0.389810 | 1.233769  |
| 10 | 6 | 0 | -1.849151 | -0.077584 | -0.087199 |
| 11 | 6 | 0 | -2.514303 | -1.288881 | -0.337600 |
| 12 | 6 | 0 | -2.601974 | 1.022716  | 0.354956  |
| 13 | 6 | 0 | -3.888858 | -1.398619 | -0.148195 |
| 14 | 1 | 0 | -1.969898 | -2.152099 | -0.696618 |
| 15 | 6 | 0 | -3.975788 | 0.897766  | 0.533492  |
| 16 | 1 | 0 | -2.108964 | 1.962061  | 0.541657  |
| 17 | 6 | 0 | -4.631147 | -0.306450 | 0.288032  |
| 18 | 1 | 0 | -4.376401 | -2.345833 | -0.350542 |
| 19 | 1 | 0 | -4.537245 | 1.759874  | 0.876377  |
| 20 | 1 | 0 | -5.701601 | -0.391628 | 0.434296  |
| 21 | 7 | 0 | -0.440981 | -0.011754 | -0.276224 |
| 22 | 6 | 0 | 2.955198  | -1.476754 | -0.542134 |
| 23 | 6 | 0 | 3.993476  | -0.894672 | 0.151865  |
| 24 | 1 | 0 | 3.011990  | -2.082181 | -1.434164 |
| 25 | 1 | 0 | 5.050100  | -0.960883 | -0.058269 |
| 26 | 6 | 0 | 0.280501  | 1.163185  | -0.491930 |
| 27 | 6 | 0 | 0.335047  | -1.260703 | -0.221410 |
| 28 | 1 | 0 | 0.248639  | -1.837101 | -1.149739 |

|    |   |   |           |           |           |
|----|---|---|-----------|-----------|-----------|
| 29 | 1 | 0 | -0.048529 | -1.878231 | 0.596020  |
| 30 | 8 | 0 | -0.193017 | 2.279092  | -0.408198 |

## REACTION f

### 1f

E= -3317.527322 au

|    |    |   |           |           |           |
|----|----|---|-----------|-----------|-----------|
| 1  | 6  | 0 | 3.643559  | -0.742150 | 0.074549  |
| 2  | 6  | 0 | 4.239134  | -1.997815 | 0.074011  |
| 3  | 6  | 0 | 3.481446  | -3.140891 | -0.177712 |
| 4  | 6  | 0 | 2.117035  | -3.016012 | -0.418156 |
| 5  | 6  | 0 | 1.508920  | -1.761816 | -0.404966 |
| 6  | 6  | 0 | 2.271666  | -0.616090 | -0.166769 |
| 7  | 1  | 0 | 4.235265  | 0.140862  | 0.274151  |
| 8  | 1  | 0 | 5.302962  | -2.081782 | 0.265525  |
| 9  | 1  | 0 | 3.950864  | -4.117842 | -0.181844 |
| 10 | 1  | 0 | 1.512954  | -3.896702 | -0.604942 |
| 11 | 1  | 0 | 0.441255  | -1.679777 | -0.560067 |
| 12 | 7  | 0 | 1.673359  | 0.689658  | -0.204618 |
| 13 | 8  | 0 | -1.333488 | -0.079411 | -0.464067 |
| 14 | 6  | 0 | -2.619762 | 0.239401  | -0.180416 |
| 15 | 6  | 0 | -0.719661 | 1.079960  | -0.883118 |
| 16 | 6  | 0 | 1.437965  | 2.991883  | 0.714948  |
| 17 | 1  | 0 | 0.815416  | 3.335153  | 1.534801  |
| 18 | 6  | 0 | 1.916119  | 3.849946  | -0.182325 |
| 19 | 1  | 0 | 2.585932  | 3.537976  | -0.977561 |
| 20 | 1  | 0 | 1.679337  | 4.906838  | -0.134067 |
| 21 | 6  | 0 | -2.865828 | 1.555104  | -0.405453 |
| 22 | 1  | 0 | -3.802267 | 2.066670  | -0.260376 |
| 23 | 6  | 0 | -1.621070 | 2.098901  | -0.862555 |
| 24 | 1  | 0 | -1.422347 | 3.123250  | -1.134014 |
| 25 | 6  | 0 | 0.714894  | 0.994047  | -1.289781 |
| 26 | 1  | 0 | 0.844496  | 0.214766  | -2.042028 |
| 27 | 1  | 0 | 0.974210  | 1.940028  | -1.762444 |
| 28 | 35 | 0 | -3.715513 | -1.147592 | 0.434102  |
| 29 | 6  | 0 | 1.883658  | 1.563653  | 0.853360  |
| 30 | 8  | 0 | 2.443852  | 1.236907  | 1.882560  |

### 2f

E= -3317.552551 au

|   |   |   |          |           |          |
|---|---|---|----------|-----------|----------|
| 1 | 6 | 0 | 2.404368 | 0.189043  | 0.113476 |
| 2 | 6 | 0 | 0.558330 | 1.217231  | 0.317264 |
| 3 | 6 | 0 | 1.807327 | -0.575528 | 1.338873 |
| 4 | 1 | 0 | 1.625154 | -1.617436 | 1.077745 |
| 5 | 1 | 0 | 2.451208 | -0.534884 | 2.216509 |

|    |    |   |           |           |           |
|----|----|---|-----------|-----------|-----------|
| 6  | 6  | 0 | 0.483767  | 0.206982  | 1.497767  |
| 7  | 1  | 0 | 0.389008  | 0.692163  | 2.472692  |
| 8  | 8  | 0 | 1.235496  | 0.403912  | -0.672036 |
| 9  | 6  | 0 | -2.921652 | 0.027107  | -0.039179 |
| 10 | 6  | 0 | -3.632251 | 1.039245  | -0.703789 |
| 11 | 6  | 0 | -3.559442 | -1.201870 | 0.199535  |
| 12 | 6  | 0 | -4.943662 | 0.827797  | -1.119157 |
| 13 | 1  | 0 | -3.174142 | 1.999441  | -0.898325 |
| 14 | 6  | 0 | -4.870857 | -1.393867 | -0.220783 |
| 15 | 1  | 0 | -3.026376 | -1.986025 | 0.712020  |
| 16 | 6  | 0 | -5.573862 | -0.388839 | -0.881271 |
| 17 | 1  | 0 | -5.470418 | 1.625567  | -1.630755 |
| 18 | 1  | 0 | -5.344910 | -2.349918 | -0.028281 |
| 19 | 1  | 0 | -6.594813 | -0.552156 | -1.205691 |
| 20 | 7  | 0 | -1.586945 | 0.272939  | 0.370956  |
| 21 | 6  | 0 | 2.777105  | 1.609787  | 0.526450  |
| 22 | 1  | 0 | 3.776141  | 1.940974  | 0.767216  |
| 23 | 6  | 0 | -0.820183 | -0.531011 | 1.209895  |
| 24 | 6  | 0 | -0.873381 | 1.478102  | -0.084381 |
| 25 | 1  | 0 | -1.262850 | 2.380293  | 0.401461  |
| 26 | 1  | 0 | -0.958682 | 1.594367  | -1.166553 |
| 27 | 8  | 0 | -1.129794 | -1.607863 | 1.671640  |
| 28 | 6  | 0 | 1.616757  | 2.258940  | 0.633185  |
| 29 | 1  | 0 | 1.435756  | 3.260925  | 0.997285  |
| 30 | 35 | 0 | 3.762964  | -0.780314 | -0.886747 |

## TS f

E= -3317.497305 au

|    |   |   |           |           |           |
|----|---|---|-----------|-----------|-----------|
| 1  | 6 | 0 | 2.494413  | 0.336223  | -0.128591 |
| 2  | 6 | 0 | 0.598637  | 1.343070  | -0.037790 |
| 3  | 6 | 0 | 1.647869  | -0.341202 | 1.832830  |
| 4  | 1 | 0 | 1.673096  | -1.380198 | 1.529759  |
| 5  | 1 | 0 | 2.423658  | -0.032888 | 2.520885  |
| 6  | 6 | 0 | 0.448158  | 0.362963  | 1.762957  |
| 7  | 1 | 0 | 0.297272  | 1.206118  | 2.431652  |
| 8  | 8 | 0 | 1.233592  | 0.282810  | -0.652164 |
| 9  | 6 | 0 | -2.875794 | 0.020544  | -0.034632 |
| 10 | 6 | 0 | -3.665164 | 1.011436  | -0.638965 |
| 11 | 6 | 0 | -3.414378 | -1.265964 | 0.125047  |
| 12 | 6 | 0 | -4.955492 | 0.724082  | -1.074565 |
| 13 | 1 | 0 | -3.286911 | 2.017754  | -0.762417 |
| 14 | 6 | 0 | -4.707761 | -1.535291 | -0.310232 |
| 15 | 1 | 0 | -2.824808 | -2.034563 | 0.596560  |
| 16 | 6 | 0 | -5.487249 | -0.550841 | -0.912949 |
| 17 | 1 | 0 | -5.544737 | 1.507938  | -1.537210 |
| 18 | 1 | 0 | -5.104914 | -2.535610 | -0.178188 |

|    |    |   |           |           |           |
|----|----|---|-----------|-----------|-----------|
| 19 | 1  | 0 | -6.492370 | -0.774157 | -1.251018 |
| 20 | 7  | 0 | -1.553187 | 0.348238  | 0.378344  |
| 21 | 6  | 0 | 2.793908  | 1.681279  | 0.195076  |
| 22 | 1  | 0 | 3.766707  | 2.052870  | 0.474182  |
| 23 | 6  | 0 | -0.844492 | -0.323319 | 1.373267  |
| 24 | 6  | 0 | -0.866213 | 1.462687  | -0.289781 |
| 25 | 1  | 0 | -1.204650 | 2.436878  | 0.082310  |
| 26 | 1  | 0 | -1.082465 | 1.418035  | -1.361182 |
| 27 | 8  | 0 | -1.225668 | -1.342097 | 1.913132  |
| 28 | 6  | 0 | 1.578539  | 2.327410  | 0.245474  |
| 29 | 1  | 0 | 1.377178  | 3.323785  | 0.609528  |
| 30 | 35 | 0 | 3.724056  | -0.933937 | -0.815254 |

## REACTION g

### 1g

E= -3317.527389 au

|    |    |   |           |           |           |
|----|----|---|-----------|-----------|-----------|
| 1  | 6  | 0 | 4.104274  | 0.308581  | 0.002801  |
| 2  | 6  | 0 | 5.192919  | -0.548219 | 0.112309  |
| 3  | 6  | 0 | 5.010465  | -1.930470 | 0.099367  |
| 4  | 6  | 0 | 3.724196  | -2.447964 | -0.013212 |
| 5  | 6  | 0 | 2.625375  | -1.595644 | -0.108629 |
| 6  | 6  | 0 | 2.810668  | -0.211134 | -0.110301 |
| 7  | 1  | 0 | 4.251230  | 1.379945  | 0.016818  |
| 8  | 1  | 0 | 6.190015  | -0.132098 | 0.201977  |
| 9  | 1  | 0 | 5.862789  | -2.595148 | 0.180123  |
| 10 | 1  | 0 | 3.566202  | -3.520614 | -0.014496 |
| 11 | 1  | 0 | 1.626241  | -2.007347 | -0.162522 |
| 12 | 7  | 0 | 1.696260  | 0.682342  | -0.264771 |
| 13 | 8  | 0 | -0.658205 | -1.325037 | -0.058381 |
| 14 | 6  | 0 | -2.734671 | -0.545210 | -0.071922 |
| 15 | 6  | 0 | -1.940686 | -1.567819 | 0.333828  |
| 16 | 1  | 0 | -2.120439 | -2.477654 | 0.878388  |
| 17 | 6  | 0 | -1.900109 | 0.397016  | -0.751818 |
| 18 | 1  | 0 | -2.200372 | 1.332674  | -1.192832 |
| 19 | 6  | 0 | -0.643232 | -0.124235 | -0.715601 |
| 20 | 6  | 0 | 0.502033  | 2.780515  | 0.345822  |
| 21 | 1  | 0 | -0.178906 | 2.960084  | 1.171411  |
| 22 | 6  | 0 | 0.520304  | 3.590038  | -0.709807 |
| 23 | 1  | 0 | 1.230700  | 3.463509  | -1.520850 |
| 24 | 1  | 0 | -0.157411 | 4.432814  | -0.785707 |
| 25 | 35 | 0 | -4.594058 | -0.393973 | 0.217720  |
| 26 | 6  | 0 | 0.661779  | 0.352497  | -1.268052 |
| 27 | 1  | 0 | 1.092463  | -0.411838 | -1.916398 |
| 28 | 1  | 0 | 0.454994  | 1.220410  | -1.891609 |
| 29 | 6  | 0 | 1.536300  | 1.729745  | 0.633922  |
| 30 | 8  | 0 | 2.218584  | 1.855252  | 1.632964  |

## 2g

E= -3317.551343 au

|    |    |   |           |           |           |
|----|----|---|-----------|-----------|-----------|
| 1  | 6  | 0 | 1.978139  | 0.641688  | 1.012767  |
| 2  | 6  | 0 | 0.505980  | -0.466936 | -0.075738 |
| 3  | 6  | 0 | 1.395113  | 1.766876  | 0.093577  |
| 4  | 1  | 0 | 0.918060  | 2.538663  | 0.698427  |
| 5  | 1  | 0 | 2.146833  | 2.234131  | -0.542840 |
| 6  | 6  | 0 | 0.346187  | 0.949469  | -0.693431 |
| 7  | 1  | 0 | 0.510438  | 0.967913  | -1.773858 |
| 8  | 1  | 0 | 2.472800  | 0.962690  | 1.924986  |
| 9  | 8  | 0 | 0.796872  | -0.117955 | 1.296276  |
| 10 | 6  | 0 | -3.172786 | -0.165236 | -0.087138 |
| 11 | 6  | 0 | -3.692024 | -1.469389 | -0.117981 |
| 12 | 6  | 0 | -4.058416 | 0.910237  | 0.095513  |
| 13 | 6  | 0 | -5.057694 | -1.692027 | 0.032345  |
| 14 | 1  | 0 | -3.040052 | -2.319568 | -0.265785 |
| 15 | 6  | 0 | -5.420008 | 0.668556  | 0.241219  |
| 16 | 1  | 0 | -3.673110 | 1.916608  | 0.116521  |
| 17 | 6  | 0 | -5.932773 | -0.626414 | 0.213102  |
| 18 | 1  | 0 | -5.432733 | -2.709016 | 0.004624  |
| 19 | 1  | 0 | -6.086672 | 1.512069  | 0.382510  |
| 20 | 1  | 0 | -6.995785 | -0.801213 | 0.330363  |
| 21 | 7  | 0 | -1.777264 | 0.028630  | -0.240004 |
| 22 | 6  | 0 | 1.826585  | -1.061710 | -0.538729 |
| 23 | 6  | 0 | 2.737075  | -0.351307 | 0.128133  |
| 24 | 1  | 0 | 1.972462  | -1.782876 | -1.329144 |
| 25 | 35 | 0 | 4.613580  | -0.356383 | -0.065595 |
| 26 | 6  | 0 | -0.852045 | -1.116708 | -0.194279 |
| 27 | 1  | 0 | -0.925267 | -1.726584 | -1.102020 |
| 28 | 1  | 0 | -1.057856 | -1.746887 | 0.673157  |
| 29 | 6  | 0 | -1.128187 | 1.245181  | -0.437372 |
| 30 | 8  | 0 | -1.633679 | 2.347131  | -0.442901 |

## TS g

E= -3317.498532 au

|   |   |   |          |           |           |
|---|---|---|----------|-----------|-----------|
| 1 | 6 | 0 | 2.047936 | 0.431060  | 1.180036  |
| 2 | 6 | 0 | 0.541407 | -0.658253 | 0.081169  |
| 3 | 6 | 0 | 1.298853 | 1.945999  | -0.260666 |
| 4 | 1 | 0 | 0.989531 | 2.626913  | 0.523097  |
| 5 | 1 | 0 | 2.202716 | 2.219268  | -0.789704 |
| 6 | 6 | 0 | 0.336128 | 1.151585  | -0.882870 |
| 7 | 1 | 0 | 0.501090 | 0.835481  | -1.908846 |
| 8 | 1 | 0 | 2.444748 | 0.950008  | 2.038255  |
| 9 | 8 | 0 | 0.773170 | -0.054250 | 1.297568  |



|    |    |   |           |           |           |
|----|----|---|-----------|-----------|-----------|
| 10 | 6  | 0 | -3.134358 | -0.158241 | -0.094630 |
| 11 | 6  | 0 | -3.689361 | -1.416932 | -0.373310 |
| 12 | 6  | 0 | -3.979721 | 0.865180  | 0.361807  |
| 13 | 6  | 0 | -5.050684 | -1.647898 | -0.198113 |
| 14 | 1  | 0 | -3.068187 | -2.221992 | -0.743776 |
| 15 | 6  | 0 | -5.339186 | 0.620071  | 0.526004  |
| 16 | 1  | 0 | -3.570722 | 1.840160  | 0.568887  |
| 17 | 6  | 0 | -5.886362 | -0.631074 | 0.251702  |
| 18 | 1  | 0 | -5.454405 | -2.628893 | -0.422459 |
| 19 | 1  | 0 | -5.975317 | 1.423691  | 0.880114  |
| 20 | 1  | 0 | -6.946679 | -0.810102 | 0.386347  |
| 21 | 7  | 0 | -1.734229 | 0.032046  | -0.268856 |
| 22 | 6  | 0 | 1.780773  | -1.123018 | -0.422700 |
| 23 | 6  | 0 | 2.732419  | -0.413319 | 0.275689  |
| 24 | 1  | 0 | 1.925822  | -1.747001 | -1.290205 |
| 25 | 35 | 0 | 4.586993  | -0.341257 | -0.060833 |
| 26 | 6  | 0 | -0.849851 | -1.138371 | -0.162256 |
| 27 | 1  | 0 | -0.855438 | -1.744436 | -1.075704 |
| 28 | 1  | 0 | -1.198119 | -1.768268 | 0.661614  |
| 29 | 6  | 0 | -1.127303 | 1.263759  | -0.516682 |
| 30 | 8  | 0 | -1.708716 | 2.329443  | -0.473510 |

## REACTION h

### 1h

E= -3317.529255 au

|    |   |   |           |           |           |
|----|---|---|-----------|-----------|-----------|
| 1  | 6 | 0 | 3.550799  | 0.917326  | -0.468858 |
| 2  | 6 | 0 | 4.817693  | 0.398641  | -0.710139 |
| 3  | 6 | 0 | 5.023638  | -0.979902 | -0.741699 |
| 4  | 6 | 0 | 3.950718  | -1.836685 | -0.516277 |
| 5  | 6 | 0 | 2.680809  | -1.323842 | -0.258553 |
| 6  | 6 | 0 | 2.472126  | 0.057037  | -0.244545 |
| 7  | 1 | 0 | 3.394522  | 1.987358  | -0.442341 |
| 8  | 1 | 0 | 5.646699  | 1.076284  | -0.880276 |
| 9  | 1 | 0 | 6.011986  | -1.380403 | -0.935573 |
| 10 | 1 | 0 | 4.099185  | -2.910662 | -0.526080 |
| 11 | 1 | 0 | 1.858817  | -1.995707 | -0.047152 |
| 12 | 7 | 0 | 1.159435  | 0.601090  | -0.033658 |
| 13 | 8 | 0 | -0.394345 | -1.690714 | 0.974272  |
| 14 | 6 | 0 | -0.917621 | -0.791858 | 0.087359  |
| 15 | 6 | 0 | -0.361196 | 2.217702  | 1.086485  |
| 16 | 1 | 0 | -0.784095 | 2.185394  | 2.085367  |
| 17 | 6 | 0 | -0.906800 | 2.978903  | 0.142145  |
| 18 | 1 | 0 | -0.471317 | 3.071631  | -0.847609 |
| 19 | 1 | 0 | -1.801778 | 3.559071  | 0.333823  |
| 20 | 6 | 0 | -2.618482 | -1.844687 | 1.138630  |
| 21 | 1 | 0 | -3.607235 | -2.142731 | 1.445102  |

|    |    |   |           |           |           |
|----|----|---|-----------|-----------|-----------|
| 22 | 6  | 0 | -2.277479 | -0.859631 | 0.157294  |
| 23 | 6  | 0 | 0.029146  | -0.006137 | -0.760669 |
| 24 | 1  | 0 | 0.467615  | -0.648130 | -1.527514 |
| 25 | 1  | 0 | -0.550850 | 0.754053  | -1.282548 |
| 26 | 6  | 0 | 0.971909  | 1.538586  | 0.975641  |
| 27 | 8  | 0 | 1.850267  | 1.847177  | 1.758523  |
| 28 | 35 | 0 | -3.507243 | 0.145678  | -0.865299 |
| 29 | 6  | 0 | -1.433597 | -2.311139 | 1.602576  |
| 30 | 1  | 0 | -1.163448 | -3.040104 | 2.347180  |

## 2h

E= -3317.551656 au

|    |    |   |           |           |           |
|----|----|---|-----------|-----------|-----------|
| 1  | 6  | 0 | 2.096767  | 2.044268  | 1.072807  |
| 2  | 6  | 0 | 0.993824  | 0.331953  | 0.415355  |
| 3  | 6  | 0 | 1.458284  | 2.602194  | -0.245537 |
| 4  | 1  | 0 | 0.767865  | 3.416153  | -0.021221 |
| 5  | 1  | 0 | 2.197686  | 2.957912  | -0.963404 |
| 6  | 6  | 0 | 0.699961  | 1.344639  | -0.724261 |
| 7  | 1  | 0 | 1.025888  | 0.990949  | -1.705784 |
| 8  | 1  | 0 | 2.371810  | 2.782445  | 1.821701  |
| 9  | 8  | 0 | 1.024789  | 1.209193  | 1.551947  |
| 10 | 6  | 0 | -2.629608 | -0.204372 | -0.011978 |
| 11 | 6  | 0 | -2.907358 | -1.506842 | 0.432432  |
| 12 | 6  | 0 | -3.702513 | 0.640583  | -0.342475 |
| 13 | 6  | 0 | -4.221578 | -1.950906 | 0.545387  |
| 14 | 1  | 0 | -2.104777 | -2.186135 | 0.685572  |
| 15 | 6  | 0 | -5.008771 | 0.178478  | -0.225630 |
| 16 | 1  | 0 | -3.502242 | 1.641015  | -0.689954 |
| 17 | 6  | 0 | -5.282482 | -1.113370 | 0.217956  |
| 18 | 1  | 0 | -4.409260 | -2.961440 | 0.890722  |
| 19 | 1  | 0 | -5.822991 | 0.846326  | -0.484384 |
| 20 | 1  | 0 | -6.305154 | -1.460597 | 0.306904  |
| 21 | 7  | 0 | -1.281032 | 0.219655  | -0.113727 |
| 22 | 6  | 0 | 2.461831  | -0.067218 | 0.324780  |
| 23 | 35 | 0 | 3.091637  | -1.677810 | -0.435304 |
| 24 | 6  | 0 | 3.156890  | 1.004685  | 0.705294  |
| 25 | 1  | 0 | 4.224439  | 1.162886  | 0.671390  |
| 26 | 6  | 0 | -0.825338 | 1.384941  | -0.723416 |
| 27 | 6  | 0 | -0.194705 | -0.595764 | 0.458917  |
| 28 | 1  | 0 | -0.015576 | -1.499932 | -0.131776 |
| 29 | 1  | 0 | -0.425313 | -0.880889 | 1.487286  |
| 30 | 8  | 0 | -1.501496 | 2.267989  | -1.206083 |

## TS h

E= -3317.499870 au

|    |    |   |           |           |           |
|----|----|---|-----------|-----------|-----------|
| 1  | 6  | 0 | 2.181822  | 1.901882  | 1.354245  |
| 2  | 6  | 0 | 1.034509  | 0.215089  | 0.640973  |
| 3  | 6  | 0 | 1.414041  | 2.577317  | -0.659854 |
| 4  | 1  | 0 | 0.878584  | 3.425377  | -0.250761 |
| 5  | 1  | 0 | 2.331430  | 2.808666  | -1.184411 |
| 6  | 6  | 0 | 0.710977  | 1.409223  | -0.958285 |
| 7  | 1  | 0 | 1.084954  | 0.765374  | -1.750953 |
| 8  | 1  | 0 | 2.335554  | 2.781590  | 1.959988  |
| 9  | 8  | 0 | 0.989033  | 1.255213  | 1.542517  |
| 10 | 6  | 0 | -2.594181 | -0.193962 | -0.018787 |
| 11 | 6  | 0 | -2.882266 | -1.539597 | 0.259789  |
| 12 | 6  | 0 | -3.661467 | 0.707345  | -0.162094 |
| 13 | 6  | 0 | -4.198551 | -1.971458 | 0.394416  |
| 14 | 1  | 0 | -2.085238 | -2.264557 | 0.358424  |
| 15 | 6  | 0 | -4.971300 | 0.257983  | -0.030234 |
| 16 | 1  | 0 | -3.457160 | 1.740989  | -0.386210 |
| 17 | 6  | 0 | -5.253519 | -1.076783 | 0.249990  |
| 18 | 1  | 0 | -4.392799 | -3.016642 | 0.607792  |
| 19 | 1  | 0 | -5.780789 | 0.970450  | -0.144568 |
| 20 | 1  | 0 | -6.278423 | -1.413437 | 0.353441  |
| 21 | 7  | 0 | -1.234837 | 0.211181  | -0.131914 |
| 22 | 6  | 0 | 2.407291  | -0.126097 | 0.490417  |
| 23 | 35 | 0 | 3.048567  | -1.623598 | -0.463158 |
| 24 | 6  | 0 | 3.136847  | 0.964879  | 0.908072  |
| 25 | 1  | 0 | 4.196835  | 1.131445  | 0.802420  |
| 26 | 6  | 0 | -0.795380 | 1.348620  | -0.806608 |
| 27 | 6  | 0 | -0.200984 | -0.609412 | 0.518342  |
| 28 | 1  | 0 | 0.031535  | -1.511371 | -0.056927 |
| 29 | 1  | 0 | -0.560332 | -0.917123 | 1.504542  |
| 30 | 8  | 0 | -1.529931 | 2.201875  | -1.262658 |

## REACTION i

### 1i

E= -1204.414173 au

|    |   |   |           |           |           |
|----|---|---|-----------|-----------|-----------|
| 1  | 6 | 0 | -2.583435 | 0.780065  | 0.396174  |
| 2  | 6 | 0 | -3.976475 | 0.762810  | 0.425965  |
| 3  | 6 | 0 | -4.676370 | -0.333898 | -0.066196 |
| 4  | 6 | 0 | -3.970974 | -1.413426 | -0.595863 |
| 5  | 6 | 0 | -2.581606 | -1.399728 | -0.639911 |
| 6  | 6 | 0 | -1.877350 | -0.299531 | -0.140653 |
| 7  | 1 | 0 | -2.048373 | 1.631053  | 0.799115  |
| 8  | 1 | 0 | -4.509955 | 1.608524  | 0.844820  |
| 9  | 1 | 0 | -5.759720 | -0.349778 | -0.037240 |
| 10 | 1 | 0 | -4.504934 | -2.273209 | -0.984497 |
| 11 | 1 | 0 | -2.041929 | -2.243039 | -1.045890 |

|    |    |   |           |           |           |
|----|----|---|-----------|-----------|-----------|
| 12 | 7  | 0 | -0.441173 | -0.244090 | -0.229885 |
| 13 | 6  | 0 | 0.298759  | -1.348205 | 0.182190  |
| 14 | 8  | 0 | -0.232205 | -2.327034 | 0.684106  |
| 15 | 8  | 0 | 2.532169  | -0.418100 | -0.566017 |
| 16 | 6  | 0 | 3.921056  | -2.031210 | 0.112052  |
| 17 | 1  | 0 | 4.826859  | -2.586078 | 0.296328  |
| 18 | 6  | 0 | 3.825907  | -0.823288 | -0.507338 |
| 19 | 1  | 0 | 4.545821  | -0.150617 | -0.942460 |
| 20 | 6  | 0 | 2.591240  | -2.401276 | 0.461961  |
| 21 | 1  | 0 | 2.254966  | -3.292485 | 0.964355  |
| 22 | 6  | 0 | 1.773776  | -1.392300 | 0.033327  |
| 23 | 6  | 0 | 0.709018  | 1.914983  | 0.334703  |
| 24 | 6  | 0 | 0.706510  | 1.742426  | 1.647758  |
| 25 | 1  | 0 | 0.258090  | 0.854547  | 2.075770  |
| 26 | 1  | 0 | 1.146268  | 2.468171  | 2.317613  |
| 27 | 6  | 0 | 0.145186  | 1.001518  | -0.730682 |
| 28 | 1  | 0 | -0.638134 | 1.536690  | -1.270776 |
| 29 | 1  | 0 | 0.930049  | 0.789256  | -1.454678 |
| 30 | 17 | 0 | 1.435179  | 3.360178  | -0.375230 |

**2i**

E=-1204.422521 au

|    |   |   |           |           |           |
|----|---|---|-----------|-----------|-----------|
| 1  | 6 | 0 | 3.142822  | 0.152421  | -1.367949 |
| 2  | 6 | 0 | 1.522305  | 0.709922  | -0.088474 |
| 3  | 6 | 0 | 2.703788  | -1.260521 | -0.843638 |
| 4  | 1 | 0 | 2.383074  | -1.890796 | -1.674919 |
| 5  | 1 | 0 | 3.479895  | -1.780808 | -0.285582 |
| 6  | 6 | 0 | 1.510828  | -0.847288 | 0.049740  |
| 7  | 1 | 0 | 3.665942  | 0.160892  | -2.320859 |
| 8  | 8 | 0 | 1.850630  | 0.787192  | -1.490142 |
| 9  | 6 | 0 | 0.087886  | 1.141964  | 0.164724  |
| 10 | 8 | 0 | -0.264784 | 2.251782  | 0.496048  |
| 11 | 6 | 0 | 0.086966  | -1.167777 | -0.424892 |
| 12 | 1 | 0 | 0.079601  | -1.317932 | -1.508651 |
| 13 | 1 | 0 | -0.320122 | -2.052895 | 0.062672  |
| 14 | 6 | 0 | -2.117602 | -0.002138 | -0.084379 |
| 15 | 6 | 0 | -2.881406 | 1.025906  | 0.491250  |
| 16 | 6 | 0 | -2.777575 | -1.083603 | -0.686955 |
| 17 | 6 | 0 | -4.269657 | 0.957003  | 0.456615  |
| 18 | 1 | 0 | -2.384323 | 1.867187  | 0.946795  |
| 19 | 6 | 0 | -4.168149 | -1.137645 | -0.708842 |
| 20 | 1 | 0 | -2.215707 | -1.882636 | -1.151899 |
| 21 | 6 | 0 | -4.924415 | -0.119333 | -0.138122 |
| 22 | 1 | 0 | -4.843780 | 1.759452  | 0.906187  |
| 23 | 1 | 0 | -4.656853 | -1.982657 | -1.180672 |
| 24 | 1 | 0 | -6.007037 | -0.162552 | -0.156956 |
| 25 | 7 | 0 | -0.700484 | 0.025078  | -0.062113 |

|    |    |   |          |           |           |
|----|----|---|----------|-----------|-----------|
| 26 | 17 | 0 | 1.701327 | -1.395335 | 1.778831  |
| 27 | 6  | 0 | 2.746283 | 1.300927  | 0.570382  |
| 28 | 1  | 0 | 2.762538 | 1.810304  | 1.521387  |
| 29 | 6  | 0 | 3.759841 | 0.935247  | -0.215678 |
| 30 | 1  | 0 | 4.819338 | 1.075273  | -0.052778 |

### TS h

E= -1204.375827 au

|    |    |   |           |           |           |
|----|----|---|-----------|-----------|-----------|
| 1  | 6  | 0 | 3.265025  | 0.457646  | -1.346988 |
| 2  | 6  | 0 | 1.550356  | 0.931096  | -0.138664 |
| 3  | 6  | 0 | 2.613102  | -1.501976 | -0.739298 |
| 4  | 1  | 0 | 2.451751  | -1.811077 | -1.765244 |
| 5  | 1  | 0 | 3.460846  | -1.957489 | -0.246919 |
| 6  | 6  | 0 | 1.498671  | -1.126074 | 0.024663  |
| 7  | 1  | 0 | 3.790486  | 0.344506  | -2.284033 |
| 8  | 8  | 0 | 1.949082  | 0.834454  | -1.454450 |
| 9  | 6  | 0 | 0.092586  | 1.189162  | 0.117431  |
| 10 | 8  | 0 | -0.322736 | 2.253106  | 0.532533  |
| 11 | 6  | 0 | 0.091222  | -1.155391 | -0.531360 |
| 12 | 1  | 0 | 0.157341  | -1.237305 | -1.620856 |
| 13 | 1  | 0 | -0.456018 | -2.021801 | -0.154771 |
| 14 | 6  | 0 | -2.079238 | 0.029593  | -0.129518 |
| 15 | 6  | 0 | -2.823718 | 0.867742  | 0.712816  |
| 16 | 6  | 0 | -2.755691 | -0.872172 | -0.962972 |
| 17 | 6  | 0 | -4.212677 | 0.793590  | 0.710516  |
| 18 | 1  | 0 | -2.315111 | 1.574609  | 1.348442  |
| 19 | 6  | 0 | -4.145813 | -0.939546 | -0.949091 |
| 20 | 1  | 0 | -2.204787 | -1.514517 | -1.637661 |
| 21 | 6  | 0 | -4.883642 | -0.107147 | -0.113366 |
| 22 | 1  | 0 | -4.773371 | 1.448016  | 1.368488  |
| 23 | 1  | 0 | -4.648941 | -1.643419 | -1.602458 |
| 24 | 1  | 0 | -5.966121 | -0.158367 | -0.104876 |
| 25 | 7  | 0 | -0.655948 | 0.059967  | -0.146088 |
| 26 | 6  | 0 | 2.676859  | 1.287489  | 0.642117  |
| 27 | 6  | 0 | 3.772177  | 0.960513  | -0.121610 |
| 28 | 1  | 0 | 2.647807  | 1.592656  | 1.675376  |
| 29 | 1  | 0 | 4.810209  | 0.959753  | 0.174070  |
| 30 | 17 | 0 | 1.568910  | -1.504880 | 1.776489  |

### REACTION j

#### 1j

E= -3317.537556 au

|   |   |   |          |           |          |
|---|---|---|----------|-----------|----------|
| 1 | 6 | 0 | 2.556434 | -1.120804 | 0.425651 |
|---|---|---|----------|-----------|----------|

|    |    |   |           |           |           |
|----|----|---|-----------|-----------|-----------|
| 2  | 6  | 0 | 3.897077  | -1.500365 | 0.445571  |
| 3  | 6  | 0 | 4.872454  | -0.663565 | -0.086379 |
| 4  | 6  | 0 | 4.495018  | 0.555975  | -0.646574 |
| 5  | 6  | 0 | 3.158716  | 0.937429  | -0.681200 |
| 6  | 6  | 0 | 2.178077  | 0.098940  | -0.141544 |
| 7  | 1  | 0 | 1.808397  | -1.772375 | 0.859990  |
| 8  | 1  | 0 | 4.174136  | -2.450374 | 0.888290  |
| 9  | 1  | 0 | 5.915882  | -0.956003 | -0.064790 |
| 10 | 1  | 0 | 5.245373  | 1.216196  | -1.066664 |
| 11 | 1  | 0 | 2.875464  | 1.887116  | -1.111350 |
| 12 | 7  | 0 | 0.784740  | 0.453566  | -0.218582 |
| 13 | 6  | 0 | 0.398142  | 1.736038  | 0.159870  |
| 14 | 8  | 0 | 1.194889  | 2.537114  | 0.624104  |
| 15 | 8  | 0 | -2.014943 | 1.468643  | -0.557774 |
| 16 | 6  | 0 | -2.880862 | 3.420103  | 0.099633  |
| 17 | 1  | 0 | -3.589585 | 4.212437  | 0.279119  |
| 18 | 6  | 0 | -3.139349 | 2.225871  | -0.499317 |
| 19 | 1  | 0 | -4.025048 | 1.779115  | -0.918859 |
| 20 | 6  | 0 | -1.497148 | 3.402041  | 0.435516  |
| 21 | 1  | 0 | -0.916271 | 4.168838  | 0.919639  |
| 22 | 6  | 0 | -1.004966 | 2.195496  | 0.020491  |
| 23 | 6  | 0 | -0.918919 | -1.257607 | 0.464457  |
| 24 | 6  | 0 | -0.837153 | -1.031696 | 1.766442  |
| 25 | 1  | 0 | -0.143695 | -0.288053 | 2.142442  |
| 26 | 1  | 0 | -1.445483 | -1.566309 | 2.482486  |
| 27 | 6  | 0 | -0.144723 | -0.593809 | -0.652854 |
| 28 | 1  | 0 | 0.442048  | -1.352756 | -1.173339 |
| 29 | 1  | 0 | -0.851531 | -0.196897 | -1.379157 |
| 30 | 35 | 0 | -2.149121 | -2.580750 | -0.214770 |

2j

E= -3317.546294 au

|    |   |   |           |           |           |
|----|---|---|-----------|-----------|-----------|
| 1  | 6 | 0 | 2.809407  | -1.422394 | 1.213348  |
| 2  | 6 | 0 | 1.250014  | -1.023495 | -0.196652 |
| 3  | 6 | 0 | 2.486051  | 0.071528  | 1.570897  |
| 4  | 1 | 0 | 2.147264  | 0.148789  | 2.605809  |
| 5  | 1 | 0 | 3.326878  | 0.746653  | 1.425710  |
| 6  | 6 | 0 | 1.328455  | 0.330053  | 0.578447  |
| 7  | 1 | 0 | 3.265424  | -2.009499 | 2.006603  |
| 8  | 8 | 0 | 1.479012  | -1.905765 | 0.922682  |
| 9  | 6 | 0 | -0.185705 | -1.119688 | -0.685028 |
| 10 | 8 | 0 | -0.572965 | -1.813424 | -1.598569 |
| 11 | 6 | 0 | -0.103581 | 0.434042  | 1.119827  |
| 12 | 1 | 0 | -0.167393 | -0.067264 | 2.090948  |
| 13 | 1 | 0 | -0.437807 | 1.464833  | 1.227835  |
| 14 | 6 | 0 | -2.339365 | -0.139504 | 0.113724  |
| 15 | 6 | 0 | -3.113763 | -0.588078 | -0.968355 |

|    |    |   |           |           |           |
|----|----|---|-----------|-----------|-----------|
| 16 | 6  | 0 | -2.982025 | 0.460894  | 1.206627  |
| 17 | 6  | 0 | -4.494781 | -0.428767 | -0.942303 |
| 18 | 1  | 0 | -2.631273 | -1.062354 | -1.807796 |
| 19 | 6  | 0 | -4.365214 | 0.615681  | 1.213655  |
| 20 | 1  | 0 | -2.413821 | 0.800487  | 2.062168  |
| 21 | 6  | 0 | -5.131748 | 0.173233  | 0.140649  |
| 22 | 1  | 0 | -5.077046 | -0.780271 | -1.786753 |
| 23 | 1  | 0 | -4.840372 | 1.082539  | 2.069100  |
| 24 | 1  | 0 | -6.208638 | 0.293957  | 0.148068  |
| 25 | 7  | 0 | -0.927879 | -0.270474 | 0.120119  |
| 26 | 6  | 0 | 2.481800  | -1.242882 | -1.043261 |
| 27 | 1  | 0 | 2.533565  | -1.128894 | -2.114865 |
| 28 | 6  | 0 | 3.458527  | -1.470549 | -0.164096 |
| 29 | 1  | 0 | 4.517107  | -1.583579 | -0.351950 |
| 30 | 35 | 0 | 1.675556  | 1.881171  | -0.627242 |

### TS j

E= -3317.499305 au

|    |   |   |           |           |           |
|----|---|---|-----------|-----------|-----------|
| 1  | 6 | 0 | 2.924710  | -1.716314 | 0.966530  |
| 2  | 6 | 0 | 1.274044  | -1.241900 | -0.328282 |
| 3  | 6 | 0 | 2.430204  | 0.273731  | 1.617803  |
| 4  | 1 | 0 | 2.217616  | -0.069249 | 2.624278  |
| 5  | 1 | 0 | 3.336471  | 0.853016  | 1.511659  |
| 6  | 6 | 0 | 1.348082  | 0.514221  | 0.758841  |
| 7  | 1 | 0 | 3.388532  | -2.220684 | 1.801685  |
| 8  | 8 | 0 | 1.584603  | -1.967327 | 0.801281  |
| 9  | 6 | 0 | -0.175237 | -1.173006 | -0.718330 |
| 10 | 8 | 0 | -0.620111 | -1.747904 | -1.692109 |
| 11 | 6 | 0 | -0.088345 | 0.324176  | 1.196027  |
| 12 | 1 | 0 | -0.085184 | -0.266439 | 2.118405  |
| 13 | 1 | 0 | -0.565619 | 1.282923  | 1.406139  |
| 14 | 6 | 0 | -2.290553 | -0.202959 | 0.122714  |
| 15 | 6 | 0 | -3.022684 | -0.319077 | -1.067620 |
| 16 | 6 | 0 | -2.969665 | 0.090443  | 1.313631  |
| 17 | 6 | 0 | -4.402285 | -0.142411 | -1.051023 |
| 18 | 1 | 0 | -2.513047 | -0.557641 | -1.987202 |
| 19 | 6 | 0 | -4.349657 | 0.271690  | 1.312984  |
| 20 | 1 | 0 | -2.429983 | 0.163418  | 2.248870  |
| 21 | 6 | 0 | -5.075240 | 0.155905  | 0.131587  |
| 22 | 1 | 0 | -4.953564 | -0.234804 | -1.980073 |
| 23 | 1 | 0 | -4.855146 | 0.497119  | 2.245242  |
| 24 | 1 | 0 | -6.150058 | 0.294612  | 0.132123  |
| 25 | 7 | 0 | -0.875470 | -0.358070 | 0.147946  |
| 26 | 6 | 0 | 2.430158  | -1.175026 | -1.144217 |
| 27 | 1 | 0 | 2.455769  | -0.817703 | -2.160561 |
| 28 | 6 | 0 | 3.486114  | -1.452375 | -0.309244 |
| 29 | 1 | 0 | 4.540573  | -1.371516 | -0.524967 |

30 35 0 1.568803 1.983791 -0.518657

## REACTION k

### 1k

E= -1204.407416 au

|    |    |   |           |           |           |
|----|----|---|-----------|-----------|-----------|
| 1  | 6  | 0 | -2.543781 | 0.737420  | -0.213443 |
| 2  | 6  | 0 | -3.923552 | 0.625900  | -0.056012 |
| 3  | 6  | 0 | -4.521195 | -0.626810 | 0.036768  |
| 4  | 6  | 0 | -3.726239 | -1.769565 | -0.035542 |
| 5  | 6  | 0 | -2.349653 | -1.667998 | -0.202846 |
| 6  | 6  | 0 | -1.747105 | -0.408395 | -0.291383 |
| 7  | 1  | 0 | -2.088054 | 1.718108  | -0.262922 |
| 8  | 1  | 0 | -4.526287 | 1.525020  | 0.005238  |
| 9  | 1  | 0 | -5.593857 | -0.713671 | 0.166379  |
| 10 | 1  | 0 | -4.179846 | -2.751911 | 0.034101  |
| 11 | 1  | 0 | -1.740501 | -2.558449 | -0.248853 |
| 12 | 7  | 0 | -0.334083 | -0.276132 | -0.521019 |
| 13 | 6  | 0 | 0.545799  | -1.037285 | 0.235967  |
| 14 | 8  | 0 | 0.157947  | -1.806288 | 1.101740  |
| 15 | 8  | 0 | 2.640986  | -0.149320 | -0.885231 |
| 16 | 6  | 0 | 4.225451  | -1.280437 | 0.212017  |
| 17 | 1  | 0 | 5.194805  | -1.634401 | 0.524273  |
| 18 | 6  | 0 | 3.976404  | -0.358419 | -0.756747 |
| 19 | 1  | 0 | 4.605255  | 0.216402  | -1.415795 |
| 20 | 6  | 0 | 2.954351  | -1.670567 | 0.721813  |
| 21 | 1  | 0 | 2.735154  | -2.379530 | 1.502098  |
| 22 | 6  | 0 | 2.013911  | -0.960143 | 0.029312  |
| 23 | 6  | 0 | 0.673489  | 2.688652  | -0.030291 |
| 24 | 6  | 0 | 0.072605  | 0.666596  | -1.568621 |
| 25 | 1  | 0 | -0.780932 | 0.763548  | -2.245286 |
| 26 | 1  | 0 | 0.870289  | 0.220472  | -2.163865 |
| 27 | 6  | 0 | 0.513439  | 2.056815  | -1.187115 |
| 28 | 1  | 0 | 0.759948  | 2.660684  | -2.059305 |
| 29 | 1  | 0 | 1.015314  | 3.713452  | 0.009682  |
| 30 | 17 | 0 | 0.393663  | 2.048440  | 1.570945  |

### 2k

E= -1204.418801 au

|   |   |   |           |           |           |
|---|---|---|-----------|-----------|-----------|
| 1 | 6 | 0 | -3.139756 | -0.299076 | -0.638601 |
| 2 | 6 | 0 | -1.289940 | -1.091481 | 0.062342  |
| 3 | 6 | 0 | -2.761139 | 0.754562  | 0.459990  |
| 4 | 6 | 0 | -1.384630 | 0.203047  | 0.921587  |



|    |    |   |           |           |           |
|----|----|---|-----------|-----------|-----------|
| 5  | 1  | 0 | -1.384613 | -0.008453 | 1.991390  |
| 6  | 1  | 0 | -3.817660 | 0.056770  | -1.408781 |
| 7  | 8  | 0 | -1.849109 | -0.609215 | -1.178119 |
| 8  | 6  | 0 | 0.195685  | -1.382881 | -0.060924 |
| 9  | 8  | 0 | 0.682056  | -2.457779 | -0.338588 |
| 10 | 6  | 0 | -0.081523 | 0.914399  | 0.528565  |
| 11 | 1  | 0 | -0.219308 | 1.554766  | -0.343730 |
| 12 | 1  | 0 | 0.321494  | 1.515038  | 1.345052  |
| 13 | 6  | 0 | 2.239933  | 0.039960  | 0.086420  |
| 14 | 6  | 0 | 3.162725  | -1.017713 | 0.042037  |
| 15 | 6  | 0 | 2.713260  | 1.358664  | 0.012953  |
| 16 | 6  | 0 | 4.521597  | -0.744658 | -0.070135 |
| 17 | 1  | 0 | 2.809013  | -2.035553 | 0.081990  |
| 18 | 6  | 0 | 4.077253  | 1.613018  | -0.095845 |
| 19 | 1  | 0 | 2.023911  | 2.192013  | 0.025406  |
| 20 | 6  | 0 | 4.991276  | 0.565256  | -0.137194 |
| 21 | 1  | 0 | 5.220178  | -1.573273 | -0.103361 |
| 22 | 1  | 0 | 4.420050  | 2.640001  | -0.153365 |
| 23 | 1  | 0 | 6.052835  | 0.765453  | -0.222951 |
| 24 | 7  | 0 | 0.847518  | -0.193915 | 0.217742  |
| 25 | 1  | 0 | -3.483515 | 0.802014  | 1.269718  |
| 26 | 17 | 0 | -2.731947 | 2.444899  | -0.212965 |
| 27 | 6  | 0 | -3.492143 | -1.591694 | 0.098913  |
| 28 | 1  | 0 | -4.493699 | -1.951253 | 0.288609  |
| 29 | 6  | 0 | -2.330205 | -2.097166 | 0.513914  |
| 30 | 1  | 0 | -2.136160 | -2.972871 | 1.115764  |

## TS k

E= -1204.370863 au

|    |   |   |           |           |           |
|----|---|---|-----------|-----------|-----------|
| 1  | 6 | 0 | -3.220460 | -0.564641 | -0.759852 |
| 2  | 6 | 0 | -1.294394 | -1.227140 | -0.075144 |
| 3  | 6 | 0 | -2.635293 | 0.957578  | 0.753440  |
| 4  | 6 | 0 | -1.377219 | 0.406958  | 1.065773  |
| 5  | 1 | 0 | -1.300008 | -0.025002 | 2.058243  |
| 6  | 1 | 0 | -3.890025 | -0.065598 | -1.443965 |
| 7  | 8 | 0 | -1.907859 | -0.600213 | -1.139562 |
| 8  | 6 | 0 | 0.204380  | -1.374463 | -0.140767 |
| 9  | 8 | 0 | 0.746546  | -2.431014 | -0.400772 |
| 10 | 6 | 0 | -0.071208 | 0.945896  | 0.523518  |
| 11 | 1 | 0 | -0.252509 | 1.577580  | -0.347905 |
| 12 | 1 | 0 | 0.435339  | 1.550797  | 1.279806  |
| 13 | 6 | 0 | 2.223378  | 0.043860  | 0.060975  |
| 14 | 6 | 0 | 3.151004  | -1.001140 | 0.189592  |
| 15 | 6 | 0 | 2.694043  | 1.346489  | -0.160424 |
| 16 | 6 | 0 | 4.512783  | -0.733267 | 0.097966  |
| 17 | 1 | 0 | 2.801994  | -2.009387 | 0.343081  |

|    |    |   |           |           |           |
|----|----|---|-----------|-----------|-----------|
| 18 | 6  | 0 | 4.060244  | 1.598303  | -0.244876 |
| 19 | 1  | 0 | 2.000911  | 2.167548  | -0.284884 |
| 20 | 6  | 0 | 4.979018  | 0.561676  | -0.116154 |
| 21 | 1  | 0 | 5.215409  | -1.552782 | 0.199751  |
| 22 | 1  | 0 | 4.401242  | 2.612602  | -0.419004 |
| 23 | 1  | 0 | 6.042455  | 0.759078  | -0.183788 |
| 24 | 7  | 0 | 0.821814  | -0.181676 | 0.169472  |
| 25 | 6  | 0 | -2.241980 | -2.113404 | 0.511039  |
| 26 | 6  | 0 | -3.472059 | -1.664144 | 0.095214  |
| 27 | 1  | 0 | -2.014922 | -2.863495 | 1.252564  |
| 28 | 1  | 0 | -4.446017 | -1.989857 | 0.427669  |
| 29 | 1  | 0 | -3.435816 | 0.929716  | 1.476987  |
| 30 | 17 | 0 | -2.770215 | 2.431470  | -0.236705 |

## REACTION I

### 11

E= -1204.409264 au

|    |   |   |           |           |           |
|----|---|---|-----------|-----------|-----------|
| 1  | 6 | 0 | 2.484962  | 0.139674  | -1.077503 |
| 2  | 6 | 0 | 3.849064  | 0.341138  | -1.267105 |
| 3  | 6 | 0 | 4.739648  | 0.174729  | -0.208019 |
| 4  | 6 | 0 | 4.261200  | -0.204624 | 1.043663  |
| 5  | 6 | 0 | 2.897720  | -0.414959 | 1.235473  |
| 6  | 6 | 0 | 2.005539  | -0.234819 | 0.178282  |
| 7  | 1 | 0 | 1.792145  | 0.252701  | -1.901272 |
| 8  | 1 | 0 | 4.216327  | 0.628180  | -2.245839 |
| 9  | 1 | 0 | 5.801094  | 0.334061  | -0.359509 |
| 10 | 1 | 0 | 4.948321  | -0.347944 | 1.869814  |
| 11 | 1 | 0 | 2.521554  | -0.730593 | 2.202201  |
| 12 | 7 | 0 | 0.593882  | -0.406858 | 0.415908  |
| 13 | 6 | 0 | -0.052605 | -1.406191 | -0.291106 |
| 14 | 8 | 0 | 0.550222  | -2.130480 | -1.069359 |
| 15 | 8 | 0 | -2.322126 | -1.039774 | 0.784448  |
| 16 | 6 | 0 | -3.560986 | -2.546478 | -0.307340 |
| 17 | 1 | 0 | -4.405880 | -3.139248 | -0.619030 |
| 18 | 6 | 0 | -3.560993 | -1.585394 | 0.654288  |
| 19 | 1 | 0 | -4.319052 | -1.187754 | 1.308137  |
| 20 | 6 | 0 | -2.228512 | -2.605045 | -0.807964 |
| 21 | 1 | 0 | -1.829040 | -3.248379 | -1.573580 |
| 22 | 6 | 0 | -1.503814 | -1.672704 | -0.120912 |
| 23 | 6 | 0 | -1.743823 | 2.261387  | 0.363112  |
| 24 | 1 | 0 | -2.557560 | 1.804838  | 0.908998  |
| 25 | 6 | 0 | -0.057008 | 0.647820  | 1.220940  |
| 26 | 1 | 0 | 0.684174  | 0.979436  | 1.951605  |
| 27 | 1 | 0 | -0.892995 | 0.232635  | 1.774141  |
| 28 | 6 | 0 | -0.491814 | 1.828017  | 0.388251  |

|    |    |   |           |          |           |
|----|----|---|-----------|----------|-----------|
| 29 | 1  | 0 | 0.271827  | 2.329218 | -0.197957 |
| 30 | 17 | 0 | -2.261431 | 3.645152 | -0.574950 |

## 2I

E= -1204.420059 au

|    |    |   |           |           |           |
|----|----|---|-----------|-----------|-----------|
| 1  | 6  | 0 | -2.915830 | 0.408461  | 1.077130  |
| 2  | 6  | 0 | -1.152617 | 0.952504  | -0.001827 |
| 3  | 6  | 0 | -2.542209 | -0.949206 | 0.383856  |
| 4  | 1  | 0 | -2.309938 | -1.696072 | 1.138967  |
| 5  | 6  | 0 | -1.301695 | -0.532379 | -0.439691 |
| 6  | 1  | 0 | -1.464840 | -0.638129 | -1.511175 |
| 7  | 1  | 0 | -3.514668 | 0.311904  | 1.978900  |
| 8  | 8  | 0 | -1.583729 | 0.852152  | 1.380103  |
| 9  | 6  | 0 | 0.330684  | 1.259713  | -0.105811 |
| 10 | 8  | 0 | 0.817727  | 2.366936  | -0.175754 |
| 11 | 6  | 0 | 0.061897  | -1.113691 | -0.035627 |
| 12 | 1  | 0 | 0.042508  | -1.516189 | 0.982074  |
| 13 | 1  | 0 | 0.396002  | -1.900106 | -0.714439 |
| 14 | 6  | 0 | 2.389895  | -0.152275 | -0.062446 |
| 15 | 6  | 0 | 3.284865  | 0.886907  | -0.365347 |
| 16 | 6  | 0 | 2.903923  | -1.410335 | 0.287184  |
| 17 | 6  | 0 | 4.655041  | 0.655743  | -0.315511 |
| 18 | 1  | 0 | 2.901705  | 1.861143  | -0.622625 |
| 19 | 6  | 0 | 4.278577  | -1.624128 | 0.328984  |
| 20 | 1  | 0 | 2.240190  | -2.226082 | 0.539846  |
| 21 | 6  | 0 | 5.164152  | -0.594655 | 0.028131  |
| 22 | 1  | 0 | 5.330975  | 1.469873  | -0.552054 |
| 23 | 1  | 0 | 4.652690  | -2.603960 | 0.603689  |
| 24 | 1  | 0 | 6.234109  | -0.762933 | 0.062085  |
| 25 | 7  | 0 | 0.985066  | 0.037109  | -0.113100 |
| 26 | 17 | 0 | -3.883118 | -1.669933 | -0.601515 |
| 27 | 6  | 0 | -2.252564 | 1.783249  | -0.619194 |
| 28 | 1  | 0 | -2.139698 | 2.437748  | -1.470995 |
| 29 | 6  | 0 | -3.360881 | 1.419227  | 0.027161  |
| 30 | 1  | 0 | -4.382886 | 1.704393  | -0.173555 |

## TS I

E= -1204.373175 au

|   |   |   |           |           |           |
|---|---|---|-----------|-----------|-----------|
| 1 | 6 | 0 | -2.897802 | 0.685500  | 1.291852  |
| 2 | 6 | 0 | -1.149979 | 1.116012  | 0.111692  |
| 3 | 6 | 0 | -2.478908 | -1.214058 | 0.199371  |
| 4 | 1 | 0 | -2.437874 | -1.797235 | 1.108209  |
| 5 | 6 | 0 | -1.312468 | -0.781736 | -0.452603 |
| 6 | 1 | 0 | -1.350500 | -0.719706 | -1.534885 |
| 7 | 1 | 0 | -3.420923 | 0.436462  | 2.202943  |

|    |    |   |           |           |           |
|----|----|---|-----------|-----------|-----------|
| 8  | 8  | 0 | -1.542319 | 0.836003  | 1.408749  |
| 9  | 6  | 0 | 0.331911  | 1.275241  | -0.106025 |
| 10 | 8  | 0 | 0.856722  | 2.349015  | -0.324218 |
| 11 | 6  | 0 | 0.055632  | -1.122116 | 0.106924  |
| 12 | 1  | 0 | -0.025086 | -1.410105 | 1.159585  |
| 13 | 1  | 0 | 0.495444  | -1.959259 | -0.440714 |
| 14 | 6  | 0 | 2.363896  | -0.142131 | -0.036427 |
| 15 | 6  | 0 | 3.235366  | 0.781954  | -0.632738 |
| 16 | 6  | 0 | 2.899678  | -1.286759 | 0.571661  |
| 17 | 6  | 0 | 4.606974  | 0.551524  | -0.613406 |
| 18 | 1  | 0 | 2.836964  | 1.673451  | -1.089511 |
| 19 | 6  | 0 | 4.274129  | -1.505272 | 0.577455  |
| 20 | 1  | 0 | 2.252352  | -2.004228 | 1.058121  |
| 21 | 6  | 0 | 5.137271  | -0.588685 | -0.014501 |
| 22 | 1  | 0 | 5.265910  | 1.276078  | -1.078615 |
| 23 | 1  | 0 | 4.666516  | -2.395956 | 1.055087  |
| 24 | 1  | 0 | 6.207471  | -0.758965 | -0.007579 |
| 25 | 7  | 0 | 0.953292  | 0.044619  | -0.046201 |
| 26 | 6  | 0 | -2.229740 | 1.775308  | -0.536031 |
| 27 | 6  | 0 | -3.347463 | 1.467305  | 0.202696  |
| 28 | 1  | 0 | -2.173122 | 2.267669  | -1.494194 |
| 29 | 1  | 0 | -4.378585 | 1.664700  | -0.044766 |
| 30 | 17 | 0 | -3.885753 | -1.655171 | -0.780356 |

## REACTION m

### 1m

E= -785.934987 au

|    |   |   |           |           |           |
|----|---|---|-----------|-----------|-----------|
| 1  | 8 | 0 | 3.427910  | 0.338276  | -0.425905 |
| 2  | 6 | 0 | 3.893641  | -1.146199 | 1.177223  |
| 3  | 1 | 0 | 4.388354  | -1.643250 | 1.996577  |
| 4  | 6 | 0 | 4.285685  | 0.008655  | 0.579641  |
| 5  | 1 | 0 | 5.111340  | 0.682672  | 0.732524  |
| 6  | 6 | 0 | 2.705530  | -1.564215 | 0.494145  |
| 7  | 1 | 0 | 2.100687  | -2.435097 | 0.690226  |
| 8  | 6 | 0 | 2.461311  | -0.630887 | -0.466595 |
| 9  | 6 | 0 | 1.379584  | -0.467245 | -1.482769 |
| 10 | 1 | 0 | 1.787080  | 0.050562  | -2.355174 |
| 11 | 1 | 0 | 1.040228  | -1.454254 | -1.792532 |
| 12 | 6 | 0 | 0.165228  | 1.729548  | -1.108204 |
| 13 | 1 | 0 | -0.826130 | 2.045097  | -1.444079 |
| 14 | 1 | 0 | 0.867174  | 2.025513  | -1.896158 |
| 15 | 6 | 0 | 0.509075  | 2.482801  | 0.154213  |
| 16 | 1 | 0 | 0.463044  | 3.564991  | 0.041402  |
| 17 | 6 | 0 | 0.839459  | 1.960963  | 1.328727  |
| 18 | 1 | 0 | 0.904681  | 0.889840  | 1.482662  |
| 19 | 1 | 0 | 1.067308  | 2.595218  | 2.177464  |

|    |   |   |           |           |           |
|----|---|---|-----------|-----------|-----------|
| 20 | 7 | 0 | 0.192824  | 0.271786  | -1.029141 |
| 21 | 6 | 0 | -0.861489 | -0.470234 | -0.557102 |
| 22 | 8 | 0 | -0.839445 | -1.683621 | -0.453341 |
| 23 | 8 | 0 | -1.909271 | 0.323424  | -0.245142 |
| 24 | 6 | 0 | -3.151723 | -0.235456 | 0.320877  |
| 25 | 6 | 0 | -4.007964 | 1.014222  | 0.529076  |
| 26 | 1 | 0 | -4.973808 | 0.739539  | 0.959893  |
| 27 | 1 | 0 | -3.508757 | 1.710944  | 1.205657  |
| 28 | 1 | 0 | -4.184523 | 1.522230  | -0.421733 |
| 29 | 6 | 0 | -2.858687 | -0.920586 | 1.658221  |
| 30 | 1 | 0 | -3.799148 | -1.227900 | 2.123710  |
| 31 | 1 | 0 | -2.231967 | -1.799445 | 1.517780  |
| 32 | 1 | 0 | -2.354137 | -0.227095 | 2.335675  |
| 33 | 6 | 0 | -3.808609 | -1.183236 | -0.686311 |
| 34 | 1 | 0 | -4.789675 | -1.489994 | -0.313211 |
| 35 | 1 | 0 | -3.953469 | -0.675400 | -1.643510 |
| 36 | 1 | 0 | -3.197843 | -2.070097 | -0.844931 |

## 2m

E= -785.941139 au

|    |   |   |           |           |           |
|----|---|---|-----------|-----------|-----------|
| 1  | 6 | 0 | 3.844672  | 0.673277  | 0.722585  |
| 2  | 6 | 0 | 2.301823  | -0.586320 | -0.064470 |
| 3  | 6 | 0 | 1.943075  | 0.795720  | -0.731789 |
| 4  | 1 | 0 | 1.954566  | 0.727728  | -1.821038 |
| 5  | 1 | 0 | 4.424263  | 1.095196  | 1.540195  |
| 6  | 8 | 0 | 2.762573  | -0.126764 | 1.223296  |
| 7  | 6 | 0 | 0.511124  | 1.021969  | -0.227832 |
| 8  | 1 | 0 | 0.513731  | 1.523257  | 0.746237  |
| 9  | 1 | 0 | -0.100243 | 1.608622  | -0.912792 |
| 10 | 7 | 0 | -0.025547 | -0.341635 | -0.109093 |
| 11 | 6 | 0 | 4.547584  | -0.306286 | -0.211901 |
| 12 | 1 | 0 | 5.592459  | -0.272548 | -0.488559 |
| 13 | 6 | 0 | 3.586119  | -1.096547 | -0.691811 |
| 14 | 1 | 0 | 3.654597  | -1.858577 | -1.456122 |
| 15 | 6 | 0 | 3.061612  | 1.703861  | -0.168743 |
| 16 | 1 | 0 | 3.685480  | 2.155465  | -0.941378 |
| 17 | 1 | 0 | 2.656639  | 2.501817  | 0.457246  |
| 18 | 6 | 0 | 1.013105  | -1.370958 | 0.028507  |
| 19 | 1 | 0 | 0.929435  | -2.113538 | -0.770571 |
| 20 | 1 | 0 | 0.939094  | -1.894696 | 0.984409  |
| 21 | 6 | 0 | -1.336288 | -0.684647 | 0.006485  |
| 22 | 8 | 0 | -1.720209 | -1.831500 | 0.147303  |
| 23 | 8 | 0 | -2.128409 | 0.416342  | -0.065311 |
| 24 | 6 | 0 | -3.595069 | 0.300425  | 0.013017  |
| 25 | 6 | 0 | -4.048212 | 1.756078  | -0.106706 |
| 26 | 1 | 0 | -5.138123 | 1.816887  | -0.057050 |
| 27 | 1 | 0 | -3.629009 | 2.355097  | 0.704668  |

|    |   |   |           |           |           |
|----|---|---|-----------|-----------|-----------|
| 28 | 1 | 0 | -3.719631 | 2.183372  | -1.056768 |
| 29 | 6 | 0 | -4.121200 | -0.530316 | -1.160828 |
| 30 | 1 | 0 | -3.772164 | -0.109646 | -2.107703 |
| 31 | 1 | 0 | -3.786688 | -1.563645 | -1.087910 |
| 32 | 1 | 0 | -5.214561 | -0.511275 | -1.163084 |
| 33 | 6 | 0 | -4.005528 | -0.284944 | 1.367267  |
| 34 | 1 | 0 | -3.575154 | 0.306010  | 2.180079  |
| 35 | 1 | 0 | -5.094371 | -0.254782 | 1.464503  |
| 36 | 1 | 0 | -3.670024 | -1.315813 | 1.464299  |

### TS m

E= -785.897566 au

|    |   |   |           |           |           |
|----|---|---|-----------|-----------|-----------|
| 1  | 6 | 0 | 4.017398  | 0.384266  | 0.771857  |
| 2  | 6 | 0 | 2.360008  | -0.760279 | -0.001821 |
| 3  | 6 | 0 | 1.845517  | 1.146369  | -0.701245 |
| 4  | 1 | 0 | 1.805910  | 0.975159  | -1.772518 |
| 5  | 1 | 0 | 4.585613  | 0.846708  | 1.566099  |
| 6  | 8 | 0 | 2.857774  | -0.235473 | 1.173083  |
| 7  | 6 | 0 | 0.506372  | 1.080434  | -0.006969 |
| 8  | 1 | 0 | 0.609003  | 1.424715  | 1.029915  |
| 9  | 1 | 0 | -0.229589 | 1.718893  | -0.495348 |
| 10 | 7 | 0 | 0.000049  | -0.299704 | -0.047571 |
| 11 | 6 | 0 | 4.525196  | -0.330199 | -0.347826 |
| 12 | 1 | 0 | 5.500023  | -0.192114 | -0.790437 |
| 13 | 6 | 0 | 3.468158  | -1.056712 | -0.840552 |
| 14 | 1 | 0 | 3.417588  | -1.614268 | -1.763894 |
| 15 | 6 | 0 | 2.914314  | 1.904729  | -0.191815 |
| 16 | 1 | 0 | 3.631594  | 2.340050  | -0.876691 |
| 17 | 1 | 0 | 2.757083  | 2.480123  | 0.715252  |
| 18 | 6 | 0 | 1.001080  | -1.371879 | 0.072090  |
| 19 | 1 | 0 | 0.864542  | -2.099029 | -0.731222 |
| 20 | 1 | 0 | 0.876880  | -1.906363 | 1.019387  |
| 21 | 6 | 0 | -1.313305 | -0.661987 | 0.001419  |
| 22 | 8 | 0 | -1.682435 | -1.822378 | 0.043524  |
| 23 | 8 | 0 | -2.126306 | 0.424126  | -0.011820 |
| 24 | 6 | 0 | -3.592442 | 0.273854  | 0.003903  |
| 25 | 6 | 0 | -4.072427 | 1.725652  | -0.024438 |
| 26 | 1 | 0 | -5.164412 | 1.761430  | -0.007709 |
| 27 | 1 | 0 | -3.693246 | 2.271273  | 0.842423  |
| 28 | 1 | 0 | -3.722268 | 2.228770  | -0.928538 |
| 29 | 6 | 0 | -4.060203 | -0.476849 | -1.246029 |
| 30 | 1 | 0 | -3.688072 | 0.019435  | -2.146228 |
| 31 | 1 | 0 | -3.707357 | -1.506542 | -1.237799 |
| 32 | 1 | 0 | -5.153014 | -0.477287 | -1.285377 |
| 33 | 6 | 0 | -4.036793 | -0.417620 | 1.296031  |
| 34 | 1 | 0 | -3.650964 | 0.122087  | 2.164886  |
| 35 | 1 | 0 | -5.128789 | -0.418620 | 1.353707  |

36 1 0 -3.680368 -1.445352 1.331170

## REACTION n

### 1n

E= -1245.104643 au

|    |    |   |           |           |           |
|----|----|---|-----------|-----------|-----------|
| 1  | 8  | 0 | 3.344071  | -0.310854 | -0.433071 |
| 2  | 6  | 0 | 3.787984  | -1.815115 | 1.157709  |
| 3  | 1  | 0 | 4.279546  | -2.330755 | 1.967328  |
| 4  | 6  | 0 | 4.205744  | -0.669922 | 0.559000  |
| 5  | 1  | 0 | 5.053015  | -0.021198 | 0.702519  |
| 6  | 6  | 0 | 2.578246  | -2.194781 | 0.490078  |
| 7  | 1  | 0 | 1.953097  | -3.050247 | 0.691000  |
| 8  | 6  | 0 | 2.348753  | -1.250728 | -0.463846 |
| 9  | 6  | 0 | 1.259288  | -1.049080 | -1.463485 |
| 10 | 1  | 0 | 1.676524  | -0.578955 | -2.358207 |
| 11 | 1  | 0 | 0.852948  | -2.020271 | -1.739414 |
| 12 | 6  | 0 | 0.199375  | 1.220341  | -1.088629 |
| 13 | 1  | 0 | -0.766506 | 1.618252  | -1.404749 |
| 14 | 1  | 0 | 0.923357  | 1.480674  | -1.866476 |
| 15 | 6  | 0 | 0.603518  | 1.924259  | 0.189078  |
| 16 | 6  | 0 | 0.894887  | 1.392164  | 1.364706  |
| 17 | 1  | 0 | 0.874961  | 0.316927  | 1.488746  |
| 18 | 1  | 0 | 1.169131  | 2.003362  | 2.213266  |
| 19 | 7  | 0 | 0.126795  | -0.229426 | -1.004218 |
| 20 | 6  | 0 | -0.987550 | -0.893995 | -0.541607 |
| 21 | 8  | 0 | -1.056942 | -2.105061 | -0.452572 |
| 22 | 8  | 0 | -1.965413 | -0.023129 | -0.219928 |
| 23 | 6  | 0 | -3.262064 | -0.486239 | 0.319244  |
| 24 | 6  | 0 | -4.014180 | 0.826826  | 0.536234  |
| 25 | 1  | 0 | -5.006441 | 0.625800  | 0.946825  |
| 26 | 1  | 0 | -3.471850 | 1.469327  | 1.232794  |
| 27 | 1  | 0 | -4.132180 | 1.363682  | -0.407614 |
| 28 | 6  | 0 | -3.044117 | -1.215740 | 1.646727  |
| 29 | 1  | 0 | -4.012962 | -1.454470 | 2.093668  |
| 30 | 1  | 0 | -2.488076 | -2.139693 | 1.498190  |
| 31 | 1  | 0 | -2.496309 | -0.577197 | 2.344358  |
| 32 | 6  | 0 | -3.976014 | -1.359581 | -0.715281 |
| 33 | 1  | 0 | -4.986059 | -1.587709 | -0.364249 |
| 34 | 1  | 0 | -4.059940 | -0.827026 | -1.666194 |
| 35 | 1  | 0 | -3.440199 | -2.292988 | -0.877946 |
| 36 | 17 | 0 | 0.650201  | 3.679434  | -0.032902 |

### 2n

E= -1245.110462 au

|    |    |   |           |           |           |
|----|----|---|-----------|-----------|-----------|
| 1  | 6  | 0 | 3.562448  | -0.508754 | 1.247323  |
| 2  | 6  | 0 | 2.063773  | -0.749066 | -0.271578 |
| 3  | 6  | 0 | 1.760813  | 0.706116  | 0.266611  |
| 4  | 1  | 0 | 4.079925  | -0.827250 | 2.148640  |
| 5  | 8  | 0 | 2.421682  | -1.350108 | 0.988378  |
| 6  | 6  | 0 | 0.316844  | 0.553495  | 0.757346  |
| 7  | 1  | 0 | 0.322909  | 0.190966  | 1.790782  |
| 8  | 1  | 0 | -0.248423 | 1.481397  | 0.713473  |
| 9  | 7  | 0 | -0.250728 | -0.450019 | -0.146587 |
| 10 | 6  | 0 | 4.316029  | -0.597057 | -0.072077 |
| 11 | 1  | 0 | 5.379951  | -0.450888 | -0.196746 |
| 12 | 6  | 0 | 3.385803  | -0.752828 | -1.014261 |
| 13 | 1  | 0 | 3.504574  | -0.760195 | -2.087532 |
| 14 | 6  | 0 | 2.871931  | 0.899685  | 1.321115  |
| 15 | 1  | 0 | 3.540411  | 1.723984  | 1.079823  |
| 16 | 1  | 0 | 2.450648  | 1.064990  | 2.314224  |
| 17 | 6  | 0 | 0.757434  | -1.281415 | -0.812883 |
| 18 | 1  | 0 | 0.695831  | -1.167893 | -1.898522 |
| 19 | 1  | 0 | 0.635295  | -2.339402 | -0.570986 |
| 20 | 6  | 0 | -1.574578 | -0.664825 | -0.381646 |
| 21 | 8  | 0 | -1.986685 | -1.515324 | -1.147431 |
| 22 | 8  | 0 | -2.333191 | 0.188512  | 0.349360  |
| 23 | 6  | 0 | -3.804396 | 0.175402  | 0.244341  |
| 24 | 6  | 0 | -4.214486 | 1.291222  | 1.206003  |
| 25 | 1  | 0 | -5.302584 | 1.388308  | 1.225912  |
| 26 | 1  | 0 | -3.866506 | 1.073054  | 2.218112  |
| 27 | 1  | 0 | -3.786784 | 2.245784  | 0.891506  |
| 28 | 6  | 0 | -4.234347 | 0.508081  | -1.187201 |
| 29 | 1  | 0 | -3.784897 | 1.451573  | -1.507724 |
| 30 | 1  | 0 | -3.936491 | -0.278225 | -1.878577 |
| 31 | 1  | 0 | -5.321503 | 0.619181  | -1.224756 |
| 32 | 6  | 0 | -4.349884 | -1.175511 | 0.715084  |
| 33 | 1  | 0 | -3.986846 | -1.398988 | 1.721650  |
| 34 | 1  | 0 | -5.442251 | -1.138221 | 0.747580  |
| 35 | 1  | 0 | -4.043930 | -1.975009 | 0.042841  |
| 36 | 17 | 0 | 1.818060  | 1.955004  | -1.066772 |

**TS n**

E= -1245.066150 au

|   |   |   |          |           |           |
|---|---|---|----------|-----------|-----------|
| 1 | 6 | 0 | 3.826500 | -0.577220 | 1.013399  |
| 2 | 6 | 0 | 2.138180 | -1.012447 | -0.258195 |
| 3 | 6 | 0 | 1.677807 | 0.969463  | 0.395887  |
| 4 | 1 | 0 | 4.420382 | -0.704557 | 1.907306  |
| 5 | 8 | 0 | 2.658328 | -1.304417 | 0.984915  |
| 6 | 6 | 0 | 0.332318 | 0.503290  | 0.894241  |



|    |    |   |           |           |           |
|----|----|---|-----------|-----------|-----------|
| 7  | 1  | 0 | 0.469507  | 0.114816  | 1.911450  |
| 8  | 1  | 0 | -0.385253 | 1.320283  | 0.938154  |
| 9  | 7  | 0 | -0.205785 | -0.533485 | 0.012952  |
| 10 | 6  | 0 | 4.301218  | -0.465869 | -0.323320 |
| 11 | 1  | 0 | 5.269608  | -0.089543 | -0.615661 |
| 12 | 6  | 0 | 3.223199  | -0.739100 | -1.129220 |
| 13 | 1  | 0 | 3.148508  | -0.616117 | -2.198101 |
| 14 | 6  | 0 | 2.774400  | 1.197408  | 1.243865  |
| 15 | 1  | 0 | 3.474046  | 1.983119  | 0.992940  |
| 16 | 1  | 0 | 2.621152  | 1.048639  | 2.307289  |
| 17 | 6  | 0 | 0.756897  | -1.501828 | -0.535446 |
| 18 | 1  | 0 | 0.595255  | -1.607473 | -1.609030 |
| 19 | 1  | 0 | 0.609660  | -2.487959 | -0.081996 |
| 20 | 6  | 0 | -1.528778 | -0.740740 | -0.253506 |
| 21 | 8  | 0 | -1.925340 | -1.646927 | -0.963174 |
| 22 | 8  | 0 | -2.308019 | 0.176610  | 0.368212  |
| 23 | 6  | 0 | -3.772048 | 0.181304  | 0.179926  |
| 24 | 6  | 0 | -4.210063 | 1.372504  | 1.032756  |
| 25 | 1  | 0 | -5.295571 | 1.487665  | 0.986718  |
| 26 | 1  | 0 | -3.920627 | 1.225093  | 2.075608  |
| 27 | 1  | 0 | -3.747738 | 2.294126  | 0.672407  |
| 28 | 6  | 0 | -4.111996 | 0.414703  | -1.294268 |
| 29 | 1  | 0 | -3.623581 | 1.323261  | -1.655687 |
| 30 | 1  | 0 | -3.792142 | -0.426409 | -1.906610 |
| 31 | 1  | 0 | -5.192484 | 0.541980  | -1.404128 |
| 32 | 6  | 0 | -4.373090 | -1.120785 | 0.716097  |
| 33 | 1  | 0 | -4.072155 | -1.276323 | 1.755531  |
| 34 | 1  | 0 | -5.464434 | -1.060443 | 0.683724  |
| 35 | 1  | 0 | -4.048207 | -1.973207 | 0.122501  |
| 36 | 17 | 0 | 1.574562  | 1.997131  | -1.069765 |

## REACTION o

### 1o

E= -3358.228043 au

|    |   |   |          |           |           |
|----|---|---|----------|-----------|-----------|
| 1  | 8 | 0 | 3.059661 | -1.436785 | -0.400033 |
| 2  | 6 | 0 | 3.083795 | -3.035380 | 1.160107  |
| 3  | 1 | 0 | 3.413676 | -3.669329 | 1.967750  |
| 4  | 6 | 0 | 3.780331 | -2.011095 | 0.603097  |
| 5  | 1 | 0 | 4.753032 | -1.586583 | 0.784693  |
| 6  | 6 | 0 | 1.839755 | -3.102431 | 0.452326  |
| 7  | 1 | 0 | 1.022065 | -3.786454 | 0.614038  |
| 8  | 6 | 0 | 1.871036 | -2.111823 | -0.481339 |
| 9  | 6 | 0 | 0.890812 | -1.634888 | -1.501261 |
| 10 | 1 | 0 | 1.435170 | -1.212462 | -2.349439 |

|    |    |   |           |           |           |
|----|----|---|-----------|-----------|-----------|
| 11 | 1  | 0 | 0.307571  | -2.484604 | -1.851770 |
| 12 | 6  | 0 | 0.277163  | 0.789581  | -1.086622 |
| 13 | 1  | 0 | -0.599864 | 1.367845  | -1.381928 |
| 14 | 1  | 0 | 1.027752  | 0.924824  | -1.870714 |
| 15 | 6  | 0 | 0.819410  | 1.373217  | 0.200832  |
| 16 | 6  | 0 | 0.998610  | 0.774121  | 1.366196  |
| 17 | 1  | 0 | 0.759489  | -0.277549 | 1.472180  |
| 18 | 1  | 0 | 1.391054  | 1.296838  | 2.227257  |
| 19 | 7  | 0 | -0.067642 | -0.622553 | -1.029491 |
| 20 | 6  | 0 | -1.282260 | -1.076769 | -0.565950 |
| 21 | 8  | 0 | -1.572455 | -2.256174 | -0.496855 |
| 22 | 8  | 0 | -2.080797 | -0.047423 | -0.219055 |
| 23 | 6  | 0 | -3.437483 | -0.275602 | 0.322892  |
| 24 | 6  | 0 | -3.932711 | 1.148100  | 0.576896  |
| 25 | 1  | 0 | -4.942040 | 1.123262  | 0.994518  |
| 26 | 1  | 0 | -3.276081 | 1.662585  | 1.281371  |
| 27 | 1  | 0 | -3.956644 | 1.719629  | -0.353497 |
| 28 | 6  | 0 | -3.352251 | -1.062304 | 1.633152  |
| 29 | 1  | 0 | -4.345623 | -1.121488 | 2.085792  |
| 30 | 1  | 0 | -2.983973 | -2.072235 | 1.462216  |
| 31 | 1  | 0 | -2.688238 | -0.554318 | 2.337002  |
| 32 | 6  | 0 | -4.306426 | -0.977873 | -0.723052 |
| 33 | 1  | 0 | -5.336028 | -1.038243 | -0.360105 |
| 34 | 1  | 0 | -4.309123 | -0.409620 | -1.656878 |
| 35 | 1  | 0 | -3.943942 | -1.984838 | -0.921834 |
| 36 | 35 | 0 | 1.257008  | 3.245787  | -0.002580 |

## 2o

E= -3358.234877

|    |   |   |           |           |           |
|----|---|---|-----------|-----------|-----------|
| 1  | 6 | 0 | 3.209734  | -1.480671 | 1.078623  |
| 2  | 6 | 0 | 1.785881  | -1.011466 | -0.460213 |
| 3  | 6 | 0 | 1.570556  | 0.170585  | 0.564378  |
| 4  | 1 | 0 | 3.645679  | -2.149963 | 1.815970  |
| 5  | 8 | 0 | 2.019540  | -2.056686 | 0.506110  |
| 6  | 6 | 0 | 0.094963  | -0.013142 | 0.934783  |
| 7  | 1 | 0 | 0.021198  | -0.726112 | 1.763870  |
| 8  | 1 | 0 | -0.398341 | 0.910960  | 1.225594  |
| 9  | 7 | 0 | -0.500609 | -0.565522 | -0.284214 |
| 10 | 6 | 0 | 4.028143  | -1.166475 | -0.165780 |
| 11 | 1 | 0 | 5.105985  | -1.091760 | -0.204343 |
| 12 | 6 | 0 | 3.144036  | -0.881965 | -1.122133 |
| 13 | 1 | 0 | 3.323117  | -0.518635 | -2.123006 |
| 14 | 6 | 0 | 2.636008  | -0.130889 | 1.640724  |
| 15 | 1 | 0 | 3.385208  | 0.652806  | 1.733222  |
| 16 | 1 | 0 | 2.172756  | -0.292214 | 2.615895  |
| 17 | 6 | 0 | 0.473265  | -1.188420 | -1.187152 |
| 18 | 1 | 0 | 0.480566  | -0.684658 | -2.157357 |

|    |    |   |           |           |           |
|----|----|---|-----------|-----------|-----------|
| 19 | 1  | 0 | 0.255087  | -2.245957 | -1.350445 |
| 20 | 6  | 0 | -1.828304 | -0.599356 | -0.584981 |
| 21 | 8  | 0 | -2.268664 | -1.090939 | -1.606668 |
| 22 | 8  | 0 | -2.555076 | -0.019832 | 0.402107  |
| 23 | 6  | 0 | -4.022348 | 0.090046  | 0.299719  |
| 24 | 6  | 0 | -4.392015 | 0.805776  | 1.599377  |
| 25 | 1  | 0 | -5.473911 | 0.947819  | 1.655009  |
| 26 | 1  | 0 | -4.073894 | 0.219403  | 2.464250  |
| 27 | 1  | 0 | -3.910411 | 1.784836  | 1.648963  |
| 28 | 6  | 0 | -4.403840 | 0.939748  | -0.915434 |
| 29 | 1  | 0 | -3.898731 | 1.908258  | -0.873052 |
| 30 | 1  | 0 | -4.132181 | 0.439803  | -1.843397 |
| 31 | 1  | 0 | -5.482659 | 1.118143  | -0.912094 |
| 32 | 6  | 0 | -4.649008 | -1.306181 | 0.251670  |
| 33 | 1  | 0 | -4.319552 | -1.898074 | 1.109688  |
| 34 | 1  | 0 | -5.738160 | -1.220044 | 0.295914  |
| 35 | 1  | 0 | -4.372817 | -1.826389 | -0.663724 |
| 36 | 35 | 0 | 1.813329  | 1.960130  | -0.292153 |

## TS o

E= -3358.189660 au

|    |   |   |           |           |           |
|----|---|---|-----------|-----------|-----------|
| 1  | 6 | 0 | 3.536880  | -1.394650 | 0.923469  |
| 2  | 6 | 0 | 1.887938  | -1.292537 | -0.465753 |
| 3  | 6 | 0 | 1.529536  | 0.430579  | 0.750082  |
| 4  | 1 | 0 | 4.073936  | -1.830808 | 1.753701  |
| 5  | 8 | 0 | 2.322434  | -1.980850 | 0.646782  |
| 6  | 6 | 0 | 0.138673  | -0.065383 | 1.057414  |
| 7  | 1 | 0 | 0.214656  | -0.754429 | 1.909104  |
| 8  | 1 | 0 | -0.530004 | 0.745345  | 1.338863  |
| 9  | 7 | 0 | -0.429274 | -0.746169 | -0.106348 |
| 10 | 6 | 0 | 4.084915  | -0.932848 | -0.305539 |
| 11 | 1 | 0 | 5.091000  | -0.568202 | -0.445790 |
| 12 | 6 | 0 | 3.032768  | -0.865793 | -1.185612 |
| 13 | 1 | 0 | 3.021131  | -0.426804 | -2.170479 |
| 14 | 6 | 0 | 2.601847  | 0.312442  | 1.649508  |
| 15 | 1 | 0 | 3.367227  | 1.076113  | 1.664727  |
| 16 | 1 | 0 | 2.391926  | -0.136621 | 2.615109  |
| 17 | 6 | 0 | 0.491388  | -1.561851 | -0.913975 |
| 18 | 1 | 0 | 0.374261  | -1.309910 | -1.968927 |
| 19 | 1 | 0 | 0.258358  | -2.626111 | -0.802093 |
| 20 | 6 | 0 | -1.754128 | -0.780472 | -0.435651 |
| 21 | 8 | 0 | -2.180943 | -1.400973 | -1.391923 |
| 22 | 8 | 0 | -2.497139 | -0.049790 | 0.429708  |
| 23 | 6 | 0 | -3.953948 | 0.095955  | 0.244552  |
| 24 | 6 | 0 | -4.346202 | 0.997580  | 1.415671  |

|    |    |   |           |           |           |
|----|----|---|-----------|-----------|-----------|
| 25 | 1  | 0 | -5.423220 | 1.180989  | 1.403184  |
| 26 | 1  | 0 | -4.085256 | 0.526914  | 2.366204  |
| 27 | 1  | 0 | -3.829762 | 1.957872  | 1.351977  |
| 28 | 6  | 0 | -4.249336 | 0.781750  | -1.091884 |
| 29 | 1  | 0 | -3.706812 | 1.728212  | -1.158682 |
| 30 | 1  | 0 | -3.960357 | 0.148066  | -1.928405 |
| 31 | 1  | 0 | -5.319137 | 0.996557  | -1.163202 |
| 32 | 6  | 0 | -4.635733 | -1.270252 | 0.360199  |
| 33 | 1  | 0 | -4.364751 | -1.749134 | 1.304843  |
| 34 | 1  | 0 | -5.721263 | -1.139437 | 0.344778  |
| 35 | 1  | 0 | -4.347159 | -1.921748 | -0.462590 |
| 36 | 35 | 0 | 1.547364  | 2.001489  | -0.419980 |

## REACTION p

### 1p

E= -1245.101772

|    |   |   |           |           |           |
|----|---|---|-----------|-----------|-----------|
| 1  | 8 | 0 | 2.929861  | -1.070830 | -0.319102 |
| 2  | 6 | 0 | 2.813597  | -2.702585 | 1.201230  |
| 3  | 1 | 0 | 3.081294  | -3.373521 | 2.002051  |
| 4  | 6 | 0 | 3.585670  | -1.709143 | 0.689096  |
| 5  | 1 | 0 | 4.576160  | -1.347760 | 0.907320  |
| 6  | 6 | 0 | 1.589923  | -2.679951 | 0.456716  |
| 7  | 1 | 0 | 0.731004  | -3.320791 | 0.576794  |
| 8  | 6 | 0 | 1.706903  | -1.672003 | -0.451603 |
| 9  | 6 | 0 | 0.790247  | -1.117545 | -1.493170 |
| 10 | 1 | 0 | 1.387307  | -0.666954 | -2.289746 |
| 11 | 1 | 0 | 0.200246  | -1.927668 | -1.917444 |
| 12 | 6 | 0 | 0.300476  | 1.265879  | -0.792518 |
| 13 | 1 | 0 | -0.532688 | 1.941690  | -0.994229 |
| 14 | 1 | 0 | 1.080625  | 1.475548  | -1.525201 |
| 15 | 7 | 0 | -0.162034 | -0.107306 | -1.010410 |
| 16 | 6 | 0 | -1.397096 | -0.549427 | -0.608118 |
| 17 | 8 | 0 | -1.772585 | -1.702019 | -0.714086 |
| 18 | 8 | 0 | -2.128484 | 0.467015  | -0.090558 |
| 19 | 6 | 0 | -3.525636 | 0.258041  | 0.343326  |
| 20 | 6 | 0 | -3.935640 | 1.652543  | 0.817437  |
| 21 | 1 | 0 | -4.967426 | 1.637386  | 1.176425  |
| 22 | 1 | 0 | -3.290320 | 1.987454  | 1.632533  |
| 23 | 1 | 0 | -3.863486 | 2.374117  | 0.000747  |
| 24 | 6 | 0 | -3.572426 | -0.744130 | 1.499665  |
| 25 | 1 | 0 | -4.591410 | -0.799678 | 1.892235  |
| 26 | 1 | 0 | -3.266171 | -1.735226 | 1.170845  |
| 27 | 1 | 0 | -2.914774 | -0.419252 | 2.310219  |
| 28 | 6 | 0 | -4.382067 | -0.185588 | -0.845299 |

|    |    |   |           |           |           |
|----|----|---|-----------|-----------|-----------|
| 29 | 1  | 0 | -5.432905 | -0.218624 | -0.545191 |
| 30 | 1  | 0 | -4.286415 | 0.527753  | -1.668109 |
| 31 | 1  | 0 | -4.084883 | -1.172477 | -1.195528 |
| 32 | 6  | 0 | 0.812586  | 1.514272  | 0.601819  |
| 33 | 1  | 0 | 0.185917  | 1.152233  | 1.411352  |
| 34 | 6  | 0 | 1.928252  | 2.139468  | 0.951787  |
| 35 | 1  | 0 | 2.233087  | 2.293739  | 1.976833  |
| 36 | 17 | 0 | 3.080588  | 2.821816  | -0.181251 |

## 2p

E= -1245.104331 au

|    |    |   |           |           |           |
|----|----|---|-----------|-----------|-----------|
| 1  | 6  | 0 | 3.586092  | -0.046925 | 0.569893  |
| 2  | 6  | 0 | 1.875844  | -1.186900 | -0.026428 |
| 3  | 1  | 0 | 4.228737  | 0.432314  | 1.302321  |
| 4  | 8  | 0 | 2.423301  | -0.612426 | 1.178413  |
| 5  | 6  | 0 | 0.290853  | 0.594365  | -0.378878 |
| 6  | 1  | 0 | 0.380090  | 1.197817  | 0.526645  |
| 7  | 1  | 0 | -0.254135 | 1.170105  | -1.124855 |
| 8  | 7  | 0 | -0.402986 | -0.672536 | -0.102679 |
| 9  | 6  | 0 | 4.139470  | -1.231505 | -0.220701 |
| 10 | 1  | 0 | 5.175437  | -1.375346 | -0.493820 |
| 11 | 6  | 0 | 3.072792  | -1.943789 | -0.582687 |
| 12 | 1  | 0 | 3.024187  | -2.813864 | -1.222721 |
| 13 | 6  | 0 | 2.945803  | 0.917226  | -0.490965 |
| 14 | 1  | 0 | 3.596654  | 1.098835  | -1.341180 |
| 15 | 6  | 0 | 0.504926  | -1.787466 | 0.186893  |
| 16 | 1  | 0 | 0.317237  | -2.626224 | -0.489753 |
| 17 | 1  | 0 | 0.393096  | -2.150495 | 1.211555  |
| 18 | 6  | 0 | -1.743464 | -0.832186 | 0.075986  |
| 19 | 8  | 0 | -2.253007 | -1.893131 | 0.386652  |
| 20 | 8  | 0 | -2.399167 | 0.332307  | -0.149949 |
| 21 | 6  | 0 | -3.866383 | 0.413095  | -0.026017 |
| 22 | 6  | 0 | -4.146550 | 1.877864  | -0.363354 |
| 23 | 1  | 0 | -5.219119 | 2.078106  | -0.304994 |
| 24 | 1  | 0 | -3.630852 | 2.538204  | 0.337168  |
| 25 | 1  | 0 | -3.803943 | 2.111618  | -1.373799 |
| 26 | 6  | 0 | -4.533376 | -0.516500 | -1.043622 |
| 27 | 1  | 0 | -4.177619 | -0.290808 | -2.052459 |
| 28 | 1  | 0 | -4.319930 | -1.559738 | -0.817725 |
| 29 | 1  | 0 | -5.615973 | -0.363917 | -1.023506 |
| 30 | 6  | 0 | -4.288795 | 0.097811  | 1.411702  |
| 31 | 1  | 0 | -3.757888 | 0.747922  | 2.111976  |
| 32 | 1  | 0 | -5.361120 | 0.278645  | 1.525844  |
| 33 | 1  | 0 | -4.077909 | -0.940043 | 1.663327  |
| 34 | 6  | 0 | 1.667468  | 0.124914  | -0.871243 |
| 35 | 1  | 0 | 1.634041  | -0.077659 | -1.942669 |
| 36 | 17 | 0 | 2.652518  | 2.574015  | 0.203706  |

## TS p

E= -1245.059953 au

|    |    |   |           |           |           |
|----|----|---|-----------|-----------|-----------|
| 1  | 6  | 0 | -3.794457 | -0.368544 | -0.431095 |
| 2  | 6  | 0 | -1.890032 | -1.324555 | -0.109228 |
| 3  | 1  | 0 | -4.518419 | 0.175414  | -1.019604 |
| 4  | 8  | 0 | -2.624988 | -0.671449 | -1.076868 |
| 5  | 6  | 0 | -0.275940 | 0.703661  | 0.178193  |
| 6  | 1  | 0 | -0.494733 | 1.224857  | -0.758323 |
| 7  | 1  | 0 | 0.399651  | 1.329910  | 0.759561  |
| 8  | 7  | 0 | 0.393913  | -0.576541 | -0.080474 |
| 9  | 6  | 0 | -4.027902 | -1.370584 | 0.549479  |
| 10 | 1  | 0 | -4.942629 | -1.502015 | 1.107314  |
| 11 | 6  | 0 | -2.817101 | -1.982760 | 0.753036  |
| 12 | 1  | 0 | -2.552805 | -2.699609 | 1.516171  |
| 13 | 6  | 0 | -2.771439 | 1.103662  | 0.731480  |
| 14 | 1  | 0 | -3.435139 | 1.276214  | 1.565556  |
| 15 | 6  | 0 | -0.484366 | -1.687894 | -0.472628 |
| 16 | 1  | 0 | -0.169286 | -2.598062 | 0.039395  |
| 17 | 1  | 0 | -0.420802 | -1.877822 | -1.549625 |
| 18 | 6  | 0 | 1.741696  | -0.764833 | -0.185309 |
| 19 | 8  | 0 | 2.239262  | -1.830613 | -0.501030 |
| 20 | 8  | 0 | 2.421966  | 0.366918  | 0.117741  |
| 21 | 6  | 0 | 3.897172  | 0.396021  | 0.096235  |
| 22 | 6  | 0 | 4.203904  | 1.838445  | 0.500346  |
| 23 | 1  | 0 | 5.284142  | 2.001363  | 0.519074  |
| 24 | 1  | 0 | 3.759108  | 2.538866  | -0.209812 |
| 25 | 1  | 0 | 3.803557  | 2.052426  | 1.493839  |
| 26 | 6  | 0 | 4.459557  | -0.587590 | 1.126002  |
| 27 | 1  | 0 | 4.037098  | -0.383820 | 2.113522  |
| 28 | 1  | 0 | 4.233480  | -1.615584 | 0.848862  |
| 29 | 1  | 0 | 5.544631  | -0.468459 | 1.190172  |
| 30 | 6  | 0 | 4.405594  | 0.109101  | -1.319170 |
| 31 | 1  | 0 | 3.948665  | 0.800638  | -2.031891 |
| 32 | 1  | 0 | 5.489151  | 0.251528  | -1.354466 |
| 33 | 1  | 0 | 4.174289  | -0.911547 | -1.618541 |
| 34 | 6  | 0 | -1.553494 | 0.422555  | 0.931671  |
| 35 | 1  | 0 | -1.401885 | 0.039570  | 1.935574  |
| 36 | 17 | 0 | -2.843796 | 2.503704  | -0.376252 |

## REACTION q

### 1q

E= -1245.100919 au

|   |   |   |           |           |           |
|---|---|---|-----------|-----------|-----------|
| 1 | 8 | 0 | -3.175880 | -0.822701 | 0.658861  |
| 2 | 6 | 0 | -3.586594 | -1.271713 | -1.490654 |

|    |    |   |           |           |           |
|----|----|---|-----------|-----------|-----------|
| 3  | 1  | 0 | -4.078977 | -1.313977 | -2.449106 |
| 4  | 6  | 0 | -4.060883 | -0.675513 | -0.366498 |
| 5  | 1  | 0 | -4.963058 | -0.135747 | -0.134334 |
| 6  | 6  | 0 | -2.314305 | -1.829670 | -1.139338 |
| 7  | 1  | 0 | -1.632982 | -2.374454 | -1.773198 |
| 8  | 6  | 0 | -2.107875 | -1.529514 | 0.172749  |
| 9  | 6  | 0 | -0.977240 | -1.781041 | 1.114684  |
| 10 | 1  | 0 | -1.369318 | -1.855609 | 2.132188  |
| 11 | 1  | 0 | -0.506881 | -2.727516 | 0.853769  |
| 12 | 6  | 0 | -0.035263 | 0.419560  | 1.959940  |
| 13 | 1  | 0 | 0.950357  | 0.660387  | 2.365542  |
| 14 | 1  | 0 | -0.665780 | 0.147746  | 2.814149  |
| 15 | 6  | 0 | -1.011386 | 1.767221  | 0.068325  |
| 16 | 1  | 0 | -1.006626 | 0.960129  | -0.649918 |
| 17 | 7  | 0 | 0.081615  | -0.759454 | 1.109332  |
| 18 | 6  | 0 | 1.162328  | -0.982914 | 0.288655  |
| 19 | 8  | 0 | 1.261508  | -1.951750 | -0.441196 |
| 20 | 8  | 0 | 2.076214  | 0.002105  | 0.415884  |
| 21 | 6  | 0 | 3.318621  | 0.005075  | -0.385065 |
| 22 | 6  | 0 | 4.002089  | 1.292236  | 0.076383  |
| 23 | 1  | 0 | 4.948254  | 1.424673  | -0.453665 |
| 24 | 1  | 0 | 3.366168  | 2.156805  | -0.124515 |
| 25 | 1  | 0 | 4.208596  | 1.255649  | 1.148419  |
| 26 | 6  | 0 | 2.979741  | 0.074345  | -1.876081 |
| 27 | 1  | 0 | 3.900015  | 0.199418  | -2.452915 |
| 28 | 1  | 0 | 2.479026  | -0.833822 | -2.206755 |
| 29 | 1  | 0 | 2.333342  | 0.932080  | -2.078207 |
| 30 | 6  | 0 | 4.168349  | -1.219418 | -0.037196 |
| 31 | 1  | 0 | 5.135914  | -1.146675 | -0.541234 |
| 32 | 1  | 0 | 4.349518  | -1.261336 | 1.040034  |
| 33 | 1  | 0 | 3.676413  | -2.138650 | -0.349885 |
| 34 | 6  | 0 | -0.602213 | 1.666267  | 1.322755  |
| 35 | 1  | 0 | -0.655873 | 2.533361  | 1.975065  |
| 36 | 17 | 0 | -1.643903 | 3.258997  | -0.600065 |

## 2q

E= -1245.107186 au

|    |   |   |           |           |           |
|----|---|---|-----------|-----------|-----------|
| 1  | 6 | 0 | 3.363441  | -0.361071 | 1.032857  |
| 2  | 6 | 0 | 1.712491  | -1.121179 | -0.109377 |
| 3  | 1 | 0 | 3.943282  | -0.243295 | 1.944426  |
| 4  | 8 | 0 | 2.147016  | -1.078221 | 1.273401  |
| 5  | 6 | 0 | 0.151630  | 0.722962  | 0.073797  |
| 6  | 1 | 0 | 0.128846  | 0.985547  | 1.137415  |
| 7  | 1 | 0 | -0.317762 | 1.531415  | -0.485521 |
| 8  | 7 | 0 | -0.555010 | -0.542189 | -0.166453 |
| 9  | 6 | 0 | 3.982627  | -1.147462 | -0.114629 |
| 10 | 1 | 0 | 5.036593  | -1.198631 | -0.343858 |

|    |    |   |           |           |           |
|----|----|---|-----------|-----------|-----------|
| 11 | 6  | 0 | 2.954586  | -1.635761 | -0.808646 |
| 12 | 1  | 0 | 2.968174  | -2.177710 | -1.744075 |
| 13 | 6  | 0 | 0.329402  | -1.709890 | -0.260903 |
| 14 | 1  | 0 | 0.205073  | -2.213289 | -1.224242 |
| 15 | 1  | 0 | 0.125346  | -2.437497 | 0.528108  |
| 16 | 6  | 0 | -1.905739 | -0.718713 | -0.158127 |
| 17 | 8  | 0 | -2.438058 | -1.803629 | -0.300005 |
| 18 | 8  | 0 | -2.540810 | 0.465802  | 0.019306  |
| 19 | 6  | 0 | -4.013828 | 0.539116  | 0.054749  |
| 20 | 6  | 0 | -4.265418 | 2.032851  | 0.263355  |
| 21 | 1  | 0 | -5.339084 | 2.229115  | 0.314000  |
| 22 | 1  | 0 | -3.805647 | 2.373347  | 1.193691  |
| 23 | 1  | 0 | -3.845418 | 2.612329  | -0.561815 |
| 24 | 6  | 0 | -4.598253 | 0.071747  | -1.281097 |
| 25 | 1  | 0 | -4.156543 | 0.637111  | -2.105933 |
| 26 | 1  | 0 | -4.413057 | -0.989082 | -1.439761 |
| 27 | 1  | 0 | -5.677474 | 0.247289  | -1.289119 |
| 28 | 6  | 0 | -4.548942 | -0.272085 | 1.237846  |
| 29 | 1  | 0 | -4.077697 | 0.059196  | 2.166921  |
| 30 | 1  | 0 | -5.627447 | -0.117503 | 1.329812  |
| 31 | 1  | 0 | -4.355249 | -1.334609 | 1.102254  |
| 32 | 6  | 0 | 1.583486  | 0.421610  | -0.393514 |
| 33 | 1  | 0 | 1.710219  | 0.660332  | -1.448699 |
| 34 | 6  | 0 | 2.740579  | 0.965994  | 0.471693  |
| 35 | 1  | 0 | 2.385864  | 1.582199  | 1.293845  |
| 36 | 17 | 0 | 3.925617  | 2.011101  | -0.423054 |

### TS q

E= -1245.063197 au

|    |   |   |           |           |           |
|----|---|---|-----------|-----------|-----------|
| 1  | 6 | 0 | 3.444853  | -0.703520 | 1.071267  |
| 2  | 6 | 0 | 1.736053  | -1.325093 | -0.090559 |
| 3  | 1 | 0 | 3.976567  | -0.518676 | 1.993040  |
| 4  | 8 | 0 | 2.168758  | -1.186668 | 1.214579  |
| 5  | 6 | 0 | 0.155229  | 0.705155  | 0.287613  |
| 6  | 1 | 0 | 0.219339  | 0.782204  | 1.379782  |
| 7  | 1 | 0 | -0.435160 | 1.549176  | -0.069050 |
| 8  | 7 | 0 | -0.528207 | -0.531707 | -0.110273 |
| 9  | 6 | 0 | 3.967141  | -1.188261 | -0.154824 |
| 10 | 1 | 0 | 4.992430  | -1.103763 | -0.478151 |
| 11 | 6 | 0 | 2.879999  | -1.585597 | -0.894545 |
| 12 | 1 | 0 | 2.855932  | -1.882500 | -1.932275 |
| 13 | 6 | 0 | 0.310460  | -1.728340 | -0.269182 |
| 14 | 1 | 0 | 0.161111  | -2.165478 | -1.259288 |
| 15 | 1 | 0 | 0.034278  | -2.488297 | 0.468018  |
| 16 | 6 | 0 | -1.881450 | -0.698905 | -0.172418 |
| 17 | 8 | 0 | -2.405142 | -1.763449 | -0.445841 |
| 18 | 8 | 0 | -2.531312 | 0.458239  | 0.099745  |



|    |    |   |           |           |           |
|----|----|---|-----------|-----------|-----------|
| 19 | 6  | 0 | -4.005034 | 0.529744  | 0.054777  |
| 20 | 6  | 0 | -4.275579 | 1.990262  | 0.417446  |
| 21 | 1  | 0 | -5.351419 | 2.180379  | 0.430730  |
| 22 | 1  | 0 | -3.869769 | 2.221230  | 1.404761  |
| 23 | 1  | 0 | -3.814288 | 2.660274  | -0.311490 |
| 24 | 6  | 0 | -4.502655 | 0.219472  | -1.359400 |
| 25 | 1  | 0 | -4.015568 | 0.877247  | -2.084131 |
| 26 | 1  | 0 | -4.299267 | -0.815731 | -1.627721 |
| 27 | 1  | 0 | -5.580754 | 0.393489  | -1.414285 |
| 28 | 6  | 0 | -4.608868 | -0.409540 | 1.102448  |
| 29 | 1  | 0 | -4.194863 | -0.190330 | 2.090139  |
| 30 | 1  | 0 | -5.691006 | -0.259117 | 1.146813  |
| 31 | 1  | 0 | -4.407205 | -1.450549 | 0.857187  |
| 32 | 6  | 0 | 1.541476  | 0.719958  | -0.316272 |
| 33 | 1  | 0 | 1.573189  | 0.852656  | -1.392044 |
| 34 | 6  | 0 | 2.646099  | 1.178421  | 0.419955  |
| 35 | 1  | 0 | 2.517568  | 1.567942  | 1.420736  |
| 36 | 17 | 0 | 3.924798  | 2.072017  | -0.433915 |

## REACTION r

### 1r

E= -3776.698521 au

|    |   |   |           |           |           |
|----|---|---|-----------|-----------|-----------|
| 1  | 6 | 0 | -3.642008 | 0.820492  | 0.209516  |
| 2  | 6 | 0 | -5.027731 | 0.831943  | 0.062712  |
| 3  | 6 | 0 | -5.681151 | -0.246436 | -0.524599 |
| 4  | 6 | 0 | -4.936276 | -1.336839 | -0.971638 |
| 5  | 6 | 0 | -3.552567 | -1.351608 | -0.839463 |
| 6  | 6 | 0 | -2.896242 | -0.270019 | -0.244469 |
| 7  | 1 | 0 | -3.145162 | 1.657139  | 0.684819  |
| 8  | 1 | 0 | -5.593110 | 1.685577  | 0.418867  |
| 9  | 1 | 0 | -6.759527 | -0.239716 | -0.632942 |
| 10 | 1 | 0 | -5.433826 | -2.182281 | -1.433111 |
| 11 | 1 | 0 | -2.982360 | -2.202682 | -1.183409 |
| 12 | 7 | 0 | -1.458976 | -0.247638 | -0.150606 |
| 13 | 6 | 0 | -0.808442 | -1.363930 | 0.359240  |
| 14 | 8 | 0 | -1.419673 | -2.323139 | 0.804725  |
| 15 | 8 | 0 | 1.532891  | -0.529665 | -0.161898 |
| 16 | 6 | 0 | 2.784532  | -0.979802 | 0.067909  |
| 17 | 6 | 0 | 0.671513  | -1.454427 | 0.393009  |
| 18 | 6 | 0 | -0.349590 | 1.875754  | 0.600347  |
| 19 | 6 | 0 | -0.509968 | 1.670220  | 1.899148  |
| 20 | 1 | 0 | -1.012675 | 0.777605  | 2.249942  |
| 21 | 1 | 0 | -0.149150 | 2.376148  | 2.634248  |
| 22 | 6 | 0 | -0.785432 | 0.991976  | -0.547259 |
| 23 | 1 | 0 | -1.480418 | 1.552136  | -1.175323 |

|    |    |   |          |           |           |
|----|----|---|----------|-----------|-----------|
| 24 | 1  | 0 | 0.082643 | 0.774924  | -1.167669 |
| 25 | 6  | 0 | 2.775643 | -2.158894 | 0.749690  |
| 26 | 1  | 0 | 3.637615 | -2.726018 | 1.057962  |
| 27 | 6  | 0 | 1.400675 | -2.463545 | 0.956624  |
| 28 | 1  | 0 | 0.978520 | -3.319910 | 1.455371  |
| 29 | 35 | 0 | 4.189741 | 0.068450  | -0.581329 |
| 30 | 17 | 0 | 0.462699 | 3.330466  | 0.019104  |

## 2r

E= -3776.712819 au

|    |    |   |           |           |           |
|----|----|---|-----------|-----------|-----------|
| 1  | 6  | 0 | -2.425732 | -0.069265 | 0.078411  |
| 2  | 6  | 0 | -0.531022 | 0.640026  | 0.724219  |
| 3  | 6  | 0 | -1.846226 | 0.411650  | -1.293003 |
| 4  | 1  | 0 | -1.771121 | -0.430976 | -1.980104 |
| 5  | 1  | 0 | -2.436460 | 1.200485  | -1.753376 |
| 6  | 6  | 0 | -0.456492 | 0.896355  | -0.815943 |
| 7  | 8  | 0 | -1.250782 | -0.618120 | 0.685679  |
| 8  | 6  | 0 | 2.973819  | -0.323738 | -0.014594 |
| 9  | 6  | 0 | 3.852403  | -0.069127 | 1.050172  |
| 10 | 6  | 0 | 3.453285  | -0.996747 | -1.147925 |
| 11 | 6  | 0 | 5.176964  | -0.483534 | 0.965320  |
| 12 | 1  | 0 | 3.491094  | 0.436585  | 1.931128  |
| 13 | 6  | 0 | 4.783244  | -1.400837 | -1.216862 |
| 14 | 1  | 0 | 2.794966  | -1.221606 | -1.976329 |
| 15 | 6  | 0 | 5.654297  | -1.147565 | -0.162450 |
| 16 | 1  | 0 | 5.842613  | -0.278969 | 1.796280  |
| 17 | 1  | 0 | 5.132561  | -1.920844 | -2.101638 |
| 18 | 1  | 0 | 6.689175  | -1.464089 | -0.217348 |
| 19 | 7  | 0 | 1.617376  | 0.090820  | 0.027316  |
| 20 | 6  | 0 | -1.527897 | 1.561341  | 1.386065  |
| 21 | 1  | 0 | -1.282019 | 2.432062  | 1.974099  |
| 22 | 6  | 0 | -2.717930 | 1.130304  | 0.967533  |
| 23 | 1  | 0 | -3.697528 | 1.557871  | 1.119407  |
| 24 | 35 | 0 | -3.839318 | -1.397933 | -0.050946 |
| 25 | 17 | 0 | -0.148469 | 2.646676  | -1.212204 |
| 26 | 6  | 0 | 0.780189  | 0.065115  | -1.185916 |
| 27 | 1  | 0 | 0.483018  | -0.959735 | -1.427483 |
| 28 | 1  | 0 | 1.322086  | 0.490609  | -2.029637 |
| 29 | 6  | 0 | 0.909342  | 0.436151  | 1.165225  |
| 30 | 8  | 0 | 1.318359  | 0.562652  | 2.297177  |

## TS r

E= -3776.662768 au

|   |   |   |           |           |          |
|---|---|---|-----------|-----------|----------|
| 1 | 6 | 0 | -2.540820 | -0.084960 | 0.287755 |
| 2 | 6 | 0 | -0.576921 | 0.474597  | 0.940278 |

|    |    |   |           |           |           |
|----|----|---|-----------|-----------|-----------|
| 3  | 6  | 0 | -1.669213 | 0.664635  | -1.546368 |
| 4  | 1  | 0 | -1.816868 | -0.297373 | -2.021298 |
| 5  | 1  | 0 | -2.335163 | 1.452171  | -1.869877 |
| 6  | 6  | 0 | -0.397685 | 0.990548  | -1.065222 |
| 7  | 8  | 0 | -1.329956 | -0.636799 | 0.613277  |
| 8  | 6  | 0 | 2.940028  | -0.383641 | -0.007624 |
| 9  | 6  | 0 | 3.860888  | 0.065342  | 0.949081  |
| 10 | 6  | 0 | 3.383869  | -1.213751 | -1.045993 |
| 11 | 6  | 0 | 5.195064  | -0.317171 | 0.856276  |
| 12 | 1  | 0 | 3.527274  | 0.693853  | 1.759101  |
| 13 | 6  | 0 | 4.723409  | -1.582010 | -1.129734 |
| 14 | 1  | 0 | 2.686712  | -1.589936 | -1.783485 |
| 15 | 6  | 0 | 5.637033  | -1.137292 | -0.179238 |
| 16 | 1  | 0 | 5.895654  | 0.038065  | 1.603531  |
| 17 | 1  | 0 | 5.046872  | -2.225997 | -1.939635 |
| 18 | 1  | 0 | 6.679320  | -1.427004 | -0.243409 |
| 19 | 7  | 0 | 1.567688  | -0.003225 | 0.040878  |
| 20 | 6  | 0 | -1.448223 | 1.465305  | 1.453588  |
| 21 | 1  | 0 | -1.136759 | 2.379192  | 1.933276  |
| 22 | 6  | 0 | -2.706576 | 1.116573  | 1.027495  |
| 23 | 1  | 0 | -3.624662 | 1.676731  | 1.104431  |
| 24 | 35 | 0 | -3.926236 | -1.325926 | -0.095287 |
| 25 | 17 | 0 | 0.057917  | 2.722399  | -1.102228 |
| 26 | 6  | 0 | 0.786591  | 0.058807  | -1.210904 |
| 27 | 1  | 0 | 0.408403  | -0.932134 | -1.480843 |
| 28 | 1  | 0 | 1.450343  | 0.401875  | -2.006892 |
| 29 | 6  | 0 | 0.885781  | 0.259140  | 1.209399  |
| 30 | 8  | 0 | 1.359876  | 0.352177  | 2.324116  |

## REACTION s

### 1s

E= -3776.691528 au

|    |   |   |           |           |           |
|----|---|---|-----------|-----------|-----------|
| 1  | 6 | 0 | -3.492400 | 0.884225  | -0.432251 |
| 2  | 6 | 0 | -4.880695 | 0.863297  | -0.546222 |
| 3  | 6 | 0 | -5.556852 | -0.345237 | -0.678215 |
| 4  | 6 | 0 | -4.831035 | -1.535040 | -0.701383 |
| 5  | 6 | 0 | -3.444454 | -1.523131 | -0.598511 |
| 6  | 6 | 0 | -2.764472 | -0.308444 | -0.461604 |
| 7  | 1 | 0 | -2.979438 | 1.829504  | -0.308513 |
| 8  | 1 | 0 | -5.430631 | 1.797220  | -0.519328 |
| 9  | 1 | 0 | -6.637553 | -0.361849 | -0.759789 |
| 10 | 1 | 0 | -5.345968 | -2.483462 | -0.805411 |
| 11 | 1 | 0 | -2.890601 | -2.450212 | -0.609225 |
| 12 | 7 | 0 | -1.327739 | -0.264582 | -0.411703 |

|    |    |   |           |           |           |
|----|----|---|-----------|-----------|-----------|
| 13 | 6  | 0 | -0.657216 | -1.142079 | 0.424733  |
| 14 | 8  | 0 | -1.242507 | -1.938731 | 1.141707  |
| 15 | 8  | 0 | 1.669524  | -0.364146 | -0.245335 |
| 16 | 6  | 0 | 2.928484  | -0.690382 | 0.114569  |
| 17 | 6  | 0 | 0.825521  | -1.168016 | 0.496302  |
| 18 | 6  | 0 | -0.672402 | 0.729832  | -1.269350 |
| 19 | 1  | 0 | -1.384071 | 0.966176  | -2.064821 |
| 20 | 1  | 0 | 0.181038  | 0.269838  | -1.769373 |
| 21 | 6  | 0 | 2.943253  | -1.672219 | 1.057636  |
| 22 | 1  | 0 | 3.815630  | -2.110192 | 1.512490  |
| 23 | 6  | 0 | 1.574359  | -1.978603 | 1.301671  |
| 24 | 1  | 0 | 1.168431  | -2.704087 | 1.986471  |
| 25 | 35 | 0 | 4.313208  | 0.239616  | -0.735322 |
| 26 | 6  | 0 | -0.202917 | 2.030799  | -0.670276 |
| 27 | 1  | 0 | 0.272081  | 2.673286  | -1.409955 |
| 28 | 6  | 0 | -0.234960 | 2.546723  | 0.552812  |
| 29 | 1  | 0 | 0.178346  | 3.523011  | 0.763832  |
| 30 | 17 | 0 | -0.896281 | 1.811115  | 1.993609  |

## 2s

E= -3776.706240

|    |    |   |           |           |           |
|----|----|---|-----------|-----------|-----------|
| 1  | 6  | 0 | -2.255275 | -0.401225 | 0.121643  |
| 2  | 6  | 0 | -0.303725 | -1.146416 | 0.490807  |
| 3  | 6  | 0 | -1.729733 | 0.666116  | 1.165448  |
| 4  | 8  | 0 | -1.080597 | -0.662898 | -0.635639 |
| 5  | 6  | 0 | 3.161159  | 0.062553  | -0.029664 |
| 6  | 6  | 0 | 4.083779  | -0.977670 | -0.223784 |
| 7  | 6  | 0 | 3.593554  | 1.390373  | -0.160728 |
| 8  | 6  | 0 | 5.404756  | -0.678967 | -0.538746 |
| 9  | 1  | 0 | 3.758146  | -2.002254 | -0.141067 |
| 10 | 6  | 0 | 4.920545  | 1.670564  | -0.473267 |
| 11 | 1  | 0 | 2.899646  | 2.210714  | -0.036290 |
| 12 | 6  | 0 | 5.835387  | 0.640047  | -0.663412 |
| 13 | 1  | 0 | 6.104243  | -1.494124 | -0.686373 |
| 14 | 1  | 0 | 5.232998  | 2.703918  | -0.572597 |
| 15 | 1  | 0 | 6.867748  | 0.860651  | -0.908009 |
| 16 | 7  | 0 | 1.808387  | -0.200519 | 0.308729  |
| 17 | 6  | 0 | -1.225934 | -2.188160 | 1.088883  |
| 18 | 1  | 0 | -0.910935 | -3.066904 | 1.632347  |
| 19 | 6  | 0 | -2.451916 | -1.707502 | 0.890964  |
| 20 | 1  | 0 | -3.407093 | -2.076462 | 1.232834  |
| 21 | 35 | 0 | -3.743255 | 0.102742  | -1.009152 |
| 22 | 6  | 0 | 0.918923  | 0.880840  | 0.785432  |
| 23 | 1  | 0 | 0.623938  | 1.528349  | -0.041313 |
| 24 | 1  | 0 | 1.436156  | 1.481186  | 1.534681  |
| 25 | 6  | 0 | 1.146315  | -1.398133 | 0.113190  |
| 26 | 8  | 0 | 1.597966  | -2.457931 | -0.262191 |

|    |    |   |           |           |          |
|----|----|---|-----------|-----------|----------|
| 27 | 6  | 0 | -0.285146 | 0.129812  | 1.375431 |
| 28 | 1  | 0 | -0.102414 | -0.100420 | 2.425562 |
| 29 | 17 | 0 | -1.814392 | 2.378082  | 0.598281 |
| 30 | 1  | 0 | -2.317636 | 0.648866  | 2.078109 |

### TS s

E= -3776.656565 au

|    |    |   |           |           |           |
|----|----|---|-----------|-----------|-----------|
| 1  | 6  | 0 | -2.366283 | -0.633487 | 0.017720  |
| 2  | 6  | 0 | -0.340094 | -1.215627 | 0.431542  |
| 3  | 6  | 0 | -1.508063 | 0.968338  | 1.479065  |
| 4  | 8  | 0 | -1.128446 | -0.635617 | -0.552148 |
| 5  | 6  | 0 | 3.149437  | 0.047730  | -0.061990 |
| 6  | 6  | 0 | 4.088117  | -0.994635 | -0.074230 |
| 7  | 6  | 0 | 3.568466  | 1.346148  | -0.385278 |
| 8  | 6  | 0 | 5.412856  | -0.727944 | -0.404045 |
| 9  | 1  | 0 | 3.774491  | -1.999830 | 0.157172  |
| 10 | 6  | 0 | 4.898584  | 1.596818  | -0.708990 |
| 11 | 1  | 0 | 2.860055  | 2.163608  | -0.403287 |
| 12 | 6  | 0 | 5.829447  | 0.562895  | -0.720591 |
| 13 | 1  | 0 | 6.125944  | -1.544628 | -0.408885 |
| 14 | 1  | 0 | 5.200932  | 2.607390  | -0.959167 |
| 15 | 1  | 0 | 6.864400  | 0.759423  | -0.974778 |
| 16 | 7  | 0 | 1.787600  | -0.176541 | 0.288097  |
| 17 | 6  | 0 | -1.168910 | -2.114897 | 1.167489  |
| 18 | 1  | 0 | -0.813921 | -2.836966 | 1.886591  |
| 19 | 6  | 0 | -2.458255 | -1.710670 | 0.934775  |
| 20 | 1  | 0 | -3.368889 | -2.051237 | 1.401285  |
| 21 | 35 | 0 | -3.773412 | 0.016335  | -1.055599 |
| 22 | 6  | 0 | 0.962092  | 0.948761  | 0.777087  |
| 23 | 1  | 0 | 0.626532  | 1.570074  | -0.055096 |
| 24 | 1  | 0 | 1.579175  | 1.565670  | 1.434800  |
| 25 | 6  | 0 | 1.127714  | -1.371095 | 0.107858  |
| 26 | 8  | 0 | 1.611606  | -2.434255 | -0.225576 |
| 27 | 6  | 0 | -0.225617 | 0.389571  | 1.533054  |
| 28 | 1  | 0 | 0.034323  | -0.048173 | 2.491817  |
| 29 | 17 | 0 | -1.813268 | 2.446897  | 0.570751  |
| 30 | 1  | 0 | -2.183468 | 0.889028  | 2.317050  |

### REACTION t

1t

E= -3776.693343 au

|   |   |   |           |           |           |
|---|---|---|-----------|-----------|-----------|
| 1 | 6 | 0 | -3.615959 | 0.650502  | -0.490367 |
| 2 | 6 | 0 | -5.001477 | 0.564551  | -0.610878 |
| 3 | 6 | 0 | -5.636321 | -0.671825 | -0.553571 |

|    |    |   |           |           |           |
|----|----|---|-----------|-----------|-----------|
| 4  | 6  | 0 | -4.872465 | -1.825148 | -0.380537 |
| 5  | 6  | 0 | -3.488830 | -1.749523 | -0.270179 |
| 6  | 6  | 0 | -2.850271 | -0.506481 | -0.323188 |
| 7  | 1  | 0 | -3.134378 | 1.620178  | -0.519040 |
| 8  | 1  | 0 | -5.581285 | 1.471403  | -0.739776 |
| 9  | 1  | 0 | -6.714608 | -0.738002 | -0.640551 |
| 10 | 1  | 0 | -5.355318 | -2.794780 | -0.335833 |
| 11 | 1  | 0 | -2.905013 | -2.647717 | -0.129191 |
| 12 | 7  | 0 | -1.415085 | -0.414540 | -0.264740 |
| 13 | 6  | 0 | -0.742988 | -1.110640 | 0.729522  |
| 14 | 8  | 0 | -1.331872 | -1.727316 | 1.604781  |
| 15 | 8  | 0 | 1.582515  | -0.619112 | -0.170076 |
| 16 | 6  | 0 | 2.842712  | -0.866593 | 0.245267  |
| 17 | 6  | 0 | 0.739617  | -1.143916 | 0.789371  |
| 18 | 6  | 0 | -0.530875 | 2.281593  | 0.485623  |
| 19 | 1  | 0 | -1.061401 | 1.750144  | 1.263099  |
| 20 | 6  | 0 | -0.760079 | 0.465837  | -1.243917 |
| 21 | 1  | 0 | -1.475911 | 0.616278  | -2.055840 |
| 22 | 1  | 0 | 0.093008  | -0.046015 | -1.689007 |
| 23 | 6  | 0 | 2.858331  | -1.530390 | 1.433992  |
| 24 | 1  | 0 | 3.731458  | -1.844223 | 1.980610  |
| 25 | 6  | 0 | 1.489421  | -1.709969 | 1.781706  |
| 26 | 1  | 0 | 1.084974  | -2.197737 | 2.652789  |
| 27 | 35 | 0 | 4.225600  | -0.270534 | -0.864382 |
| 28 | 6  | 0 | -0.308448 | 1.811974  | -0.733201 |
| 29 | 1  | 0 | 0.241020  | 2.416554  | -1.448806 |
| 30 | 17 | 0 | 0.020453  | 3.857410  | 1.007800  |

## 2t

E= -3776.709950 au

|    |   |   |           |           |           |
|----|---|---|-----------|-----------|-----------|
| 1  | 6 | 0 | -2.175245 | -0.328262 | -0.027040 |
| 2  | 6 | 0 | -0.255447 | -0.728619 | 0.788310  |
| 3  | 6 | 0 | -1.654799 | 1.130983  | 0.239021  |
| 4  | 1 | 0 | -1.572856 | 1.657863  | -0.707735 |
| 5  | 8 | 0 | -0.956323 | -0.913365 | -0.475491 |
| 6  | 6 | 0 | 3.252401  | 0.117413  | -0.080586 |
| 7  | 6 | 0 | 4.164128  | -0.886425 | 0.283667  |
| 8  | 6 | 0 | 3.715873  | 1.228699  | -0.800631 |
| 9  | 6 | 0 | 5.503312  | -0.764103 | -0.070147 |
| 10 | 1 | 0 | 3.816724  | -1.751615 | 0.824911  |
| 11 | 6 | 0 | 5.060564  | 1.335757  | -1.143089 |
| 12 | 1 | 0 | 3.034387  | 2.009452  | -1.109724 |
| 13 | 6 | 0 | 5.963737  | 0.342030  | -0.780755 |
| 14 | 1 | 0 | 6.193562  | -1.548775 | 0.218447  |
| 15 | 1 | 0 | 5.396283  | 2.202422  | -1.701182 |
| 16 | 1 | 0 | 7.010030  | 0.426560  | -1.049632 |
| 17 | 7 | 0 | 1.879220  | 0.038675  | 0.271172  |

|    |    |   |           |           |           |
|----|----|---|-----------|-----------|-----------|
| 18 | 6  | 0 | -1.226853 | -1.331578 | 1.775256  |
| 19 | 1  | 0 | -0.959953 | -1.784888 | 2.718685  |
| 20 | 6  | 0 | -2.434969 | -1.052784 | 1.285755  |
| 21 | 1  | 0 | -3.409698 | -1.209949 | 1.720055  |
| 22 | 35 | 0 | -3.563583 | -0.460962 | -1.374764 |
| 23 | 6  | 0 | 0.985095  | 1.201684  | 0.098430  |
| 24 | 1  | 0 | 0.769334  | 1.360966  | -0.962530 |
| 25 | 1  | 0 | 1.463803  | 2.097980  | 0.495690  |
| 26 | 6  | 0 | 1.211719  | -1.105661 | 0.675203  |
| 27 | 8  | 0 | 1.673584  | -2.199826 | 0.912611  |
| 28 | 17 | 0 | -2.744426 | 2.131666  | 1.271217  |
| 29 | 6  | 0 | -0.281291 | 0.822813  | 0.882286  |
| 30 | 1  | 0 | -0.222969 | 1.178474  | 1.909825  |

### TS t

E= -3776.687910 au

|    |    |   |           |           |           |
|----|----|---|-----------|-----------|-----------|
| 1  | 6  | 0 | -2.549683 | -2.091162 | 1.137682  |
| 2  | 6  | 0 | -3.763431 | -2.769394 | 1.211896  |
| 3  | 6  | 0 | -4.724645 | -2.591546 | 0.218889  |
| 4  | 6  | 0 | -4.469191 | -1.734445 | -0.849199 |
| 5  | 6  | 0 | -3.258178 | -1.051136 | -0.924237 |
| 6  | 6  | 0 | -2.299439 | -1.228616 | 0.071059  |
| 7  | 1  | 0 | -1.788358 | -2.238419 | 1.895386  |
| 8  | 1  | 0 | -3.953375 | -3.443060 | 2.039581  |
| 9  | 1  | 0 | -5.667861 | -3.122723 | 0.275118  |
| 10 | 1  | 0 | -5.212325 | -1.596561 | -1.626109 |
| 11 | 1  | 0 | -3.050214 | -0.385546 | -1.752921 |
| 12 | 7  | 0 | -1.051513 | -0.509523 | 0.015064  |
| 13 | 6  | 0 | -0.035207 | -1.019191 | -0.761998 |
| 14 | 8  | 0 | -0.124940 | -2.059997 | -1.380996 |
| 15 | 8  | 0 | 2.258090  | -0.614592 | -0.019957 |
| 16 | 6  | 0 | 3.329303  | 0.153040  | -0.342590 |
| 17 | 6  | 0 | 1.228965  | -0.205042 | -0.830516 |
| 18 | 6  | 0 | -2.654116 | 2.492515  | 0.802206  |
| 19 | 1  | 0 | -3.109807 | 2.169050  | 1.728853  |
| 20 | 6  | 0 | -0.930583 | 0.702125  | 0.844911  |
| 21 | 1  | 0 | 0.131046  | 0.911726  | 0.983652  |
| 22 | 1  | 0 | -1.350765 | 0.484995  | 1.829955  |
| 23 | 6  | 0 | 3.028487  | 1.036627  | -1.328197 |
| 24 | 1  | 0 | 3.695858  | 1.756156  | -1.771706 |
| 25 | 6  | 0 | 1.650992  | 0.797334  | -1.646380 |
| 26 | 1  | 0 | 1.064092  | 1.296899  | -2.400681 |
| 27 | 35 | 0 | 4.905931  | -0.161608 | 0.614307  |
| 28 | 6  | 0 | -1.610394 | 1.901224  | 0.238199  |
| 29 | 1  | 0 | -1.211317 | 2.275297  | -0.699231 |
| 30 | 17 | 0 | -3.448027 | 3.891638  | 0.120542  |

## REACTION u

### 1u

E= -3776.697852 au

|    |    |   |           |           |           |
|----|----|---|-----------|-----------|-----------|
| 1  | 6  | 0 | -3.917944 | -0.024918 | 0.480941  |
| 2  | 6  | 0 | -5.211689 | -0.537523 | 0.554262  |
| 3  | 6  | 0 | -5.499978 | -1.794500 | 0.032903  |
| 4  | 6  | 0 | -4.484232 | -2.534667 | -0.570218 |
| 5  | 6  | 0 | -3.193328 | -2.026201 | -0.657943 |
| 6  | 6  | 0 | -2.902490 | -0.765190 | -0.129182 |
| 7  | 1  | 0 | -3.700648 | 0.947320  | 0.905628  |
| 8  | 1  | 0 | -5.989810 | 0.048710  | 1.029658  |
| 9  | 1  | 0 | -6.504900 | -2.195516 | 0.095909  |
| 10 | 1  | 0 | -4.697064 | -3.514820 | -0.981579 |
| 11 | 1  | 0 | -2.409862 | -2.608659 | -1.121103 |
| 12 | 7  | 0 | -1.582613 | -0.201671 | -0.260644 |
| 13 | 6  | 0 | -0.487918 | -0.980612 | 0.090262  |
| 14 | 8  | 0 | -0.612304 | -2.095412 | 0.572001  |
| 15 | 8  | 0 | 1.246722  | 0.694508  | -0.692398 |
| 16 | 6  | 0 | 0.903779  | -0.495945 | -0.103148 |
| 17 | 6  | 0 | -1.241109 | 2.210595  | 0.346443  |
| 18 | 6  | 0 | -1.125353 | 2.016514  | 1.651509  |
| 19 | 1  | 0 | -1.215185 | 1.018020  | 2.060697  |
| 20 | 1  | 0 | -0.939991 | 2.834498  | 2.333690  |
| 21 | 6  | 0 | -1.494633 | 1.182495  | -0.733541 |
| 22 | 1  | 0 | -2.439944 | 1.418330  | -1.225702 |
| 23 | 1  | 0 | -0.720125 | 1.278012  | -1.492889 |
| 24 | 6  | 0 | 3.125028  | -0.337460 | -0.112532 |
| 25 | 6  | 0 | 2.034910  | -1.166806 | 0.269246  |
| 26 | 1  | 0 | 2.065284  | -2.128715 | 0.750999  |
| 27 | 17 | 0 | -1.100845 | 3.834129  | -0.332648 |
| 28 | 6  | 0 | 2.600600  | 0.777685  | -0.690789 |
| 29 | 1  | 0 | 3.033688  | 1.663656  | -1.121171 |
| 30 | 35 | 0 | 4.960057  | -0.698940 | 0.132551  |

### 2u

E= -3776.711443 au

|   |   |   |           |           |           |
|---|---|---|-----------|-----------|-----------|
| 1 | 6 | 0 | -1.992364 | 0.320095  | -1.384458 |
| 2 | 6 | 0 | -0.447764 | -0.431603 | -0.109583 |
| 3 | 6 | 0 | -1.412782 | 1.664777  | -0.829528 |
| 4 | 8 | 0 | -0.784865 | -0.453105 | -1.515778 |
| 5 | 6 | 0 | 3.247517  | -0.114573 | -0.086642 |
| 6 | 6 | 0 | 3.893227  | -1.221351 | 0.486810  |
| 7 | 6 | 0 | 4.021949  | 0.895247  | -0.676360 |
| 8 | 6 | 0 | 5.281303  | -1.298698 | 0.463892  |



|    |    |   |           |           |           |
|----|----|---|-----------|-----------|-----------|
| 9  | 1  | 0 | 3.307049  | -2.009076 | 0.932163  |
| 10 | 6  | 0 | 5.410633  | 0.802834  | -0.686779 |
| 11 | 1  | 0 | 3.551702  | 1.751845  | -1.140389 |
| 12 | 6  | 0 | 6.050446  | -0.293044 | -0.117313 |
| 13 | 1  | 0 | 5.763937  | -2.160017 | 0.911882  |
| 14 | 1  | 0 | 5.989601  | 1.594579  | -1.148614 |
| 15 | 1  | 0 | 7.131702  | -0.363692 | -0.127023 |
| 16 | 7  | 0 | 1.834429  | 0.008769  | -0.072534 |
| 17 | 6  | 0 | -1.721322 | -0.910726 | 0.548670  |
| 18 | 1  | 0 | -1.797259 | -1.429050 | 1.490636  |
| 19 | 6  | 0 | -2.677960 | -0.420805 | -0.239027 |
| 20 | 6  | 0 | 1.180857  | 1.285592  | -0.415482 |
| 21 | 1  | 0 | 1.206176  | 1.452679  | -1.496481 |
| 22 | 1  | 0 | 1.679950  | 2.113243  | 0.087179  |
| 23 | 6  | 0 | 0.932316  | -1.020865 | 0.135570  |
| 24 | 8  | 0 | 1.160545  | -2.167454 | 0.448616  |
| 25 | 6  | 0 | -0.270028 | 1.111685  | 0.054761  |
| 26 | 1  | 0 | -2.135246 | 2.248151  | -0.261979 |
| 27 | 1  | 0 | -2.531589 | 0.375249  | -2.325864 |
| 28 | 35 | 0 | -4.545078 | -0.430628 | 0.012664  |
| 29 | 1  | 0 | -1.029631 | 2.274535  | -1.649291 |
| 30 | 17 | 0 | -0.404781 | 1.642074  | 1.791906  |

## TS u

E=-3776.662188 au

|    |   |   |           |           |           |
|----|---|---|-----------|-----------|-----------|
| 1  | 6 | 0 | -2.112747 | 0.046832  | -1.503960 |
| 2  | 6 | 0 | -0.490002 | -0.694131 | -0.296905 |
| 3  | 6 | 0 | -1.312359 | 1.877708  | -0.721535 |
| 4  | 8 | 0 | -0.838436 | -0.450295 | -1.607860 |
| 5  | 6 | 0 | 3.201832  | -0.117888 | -0.105977 |
| 6  | 6 | 0 | 3.833517  | -1.064790 | 0.712144  |
| 7  | 6 | 0 | 3.987061  | 0.762321  | -0.862916 |
| 8  | 6 | 0 | 5.222602  | -1.118030 | 0.761699  |
| 9  | 1 | 0 | 3.239244  | -1.755686 | 1.288312  |
| 10 | 6 | 0 | 5.376011  | 0.701838  | -0.797447 |
| 11 | 1 | 0 | 3.521273  | 1.487231  | -1.518021 |
| 12 | 6 | 0 | 6.002560  | -0.238828 | 0.013964  |
| 13 | 1 | 0 | 5.696669  | -1.855253 | 1.399819  |
| 14 | 1 | 0 | 5.965747  | 1.390881  | -1.391373 |
| 15 | 1 | 0 | 7.084092  | -0.287349 | 0.062480  |
| 16 | 7 | 0 | 1.781810  | -0.017032 | -0.172519 |
| 17 | 6 | 0 | -1.659547 | -1.001871 | 0.434552  |
| 18 | 1 | 0 | -1.697330 | -1.386417 | 1.439877  |
| 19 | 6 | 0 | -2.688895 | -0.513445 | -0.334272 |
| 20 | 6 | 0 | 1.162865  | 1.289821  | -0.481887 |
| 21 | 1 | 0 | 1.138700  | 1.457915  | -1.563193 |
| 22 | 1 | 0 | 1.780096  | 2.068047  | -0.028384 |

|    |    |   |           |           |           |
|----|----|---|-----------|-----------|-----------|
| 23 | 6  | 0 | 0.932303  | -1.092873 | -0.021760 |
| 24 | 8  | 0 | 1.239245  | -2.217590 | 0.320431  |
| 25 | 6  | 0 | -0.256044 | 1.360516  | 0.037582  |
| 26 | 1  | 0 | -2.141432 | 2.355845  | -0.217906 |
| 27 | 1  | 0 | -2.613603 | 0.271433  | -2.433584 |
| 28 | 35 | 0 | -4.509102 | -0.365660 | 0.126412  |
| 29 | 1  | 0 | -1.097078 | 2.245853  | -1.717719 |
| 30 | 17 | 0 | -0.348936 | 1.593224  | 1.809568  |

## REACTION v

### 1v

E= -3776.691210 au

|    |    |   |           |           |           |
|----|----|---|-----------|-----------|-----------|
| 1  | 6  | 0 | -3.892223 | 0.338067  | -0.014176 |
| 2  | 6  | 0 | -5.205443 | -0.068098 | 0.212661  |
| 3  | 6  | 0 | -5.533550 | -1.420032 | 0.207279  |
| 4  | 6  | 0 | -4.537284 | -2.364833 | -0.032958 |
| 5  | 6  | 0 | -3.225915 | -1.968036 | -0.270510 |
| 6  | 6  | 0 | -2.895329 | -0.609224 | -0.260753 |
| 7  | 1  | 0 | -3.643797 | 1.391337  | 0.011471  |
| 8  | 1  | 0 | -5.967765 | 0.678418  | 0.404776  |
| 9  | 1  | 0 | -6.553950 | -1.736154 | 0.390900  |
| 10 | 1  | 0 | -4.780687 | -3.421301 | -0.040170 |
| 11 | 1  | 0 | -2.457420 | -2.706234 | -0.446694 |
| 12 | 7  | 0 | -1.557860 | -0.169755 | -0.560710 |
| 13 | 6  | 0 | -0.492795 | -0.785879 | 0.074544  |
| 14 | 8  | 0 | -0.646216 | -1.686778 | 0.883782  |
| 15 | 8  | 0 | 1.287416  | 0.652301  | -1.020621 |
| 16 | 6  | 0 | 0.912103  | -0.383108 | -0.201101 |
| 17 | 6  | 0 | -1.430784 | 0.886598  | -1.571466 |
| 18 | 1  | 0 | -2.322256 | 0.818221  | -2.200914 |
| 19 | 1  | 0 | -0.590010 | 0.657494  | -2.228341 |
| 20 | 6  | 0 | 3.134479  | -0.245665 | -0.176562 |
| 21 | 6  | 0 | 2.022883  | -0.964933 | 0.341726  |
| 22 | 1  | 0 | 2.025386  | -1.795595 | 1.025856  |
| 23 | 6  | 0 | 2.642285  | 0.724561  | -0.994108 |
| 24 | 1  | 0 | 3.100901  | 1.495196  | -1.588625 |
| 25 | 35 | 0 | 4.957635  | -0.561582 | 0.192588  |
| 26 | 6  | 0 | -1.291541 | 2.322301  | -1.133286 |
| 27 | 1  | 0 | -1.293814 | 3.009671  | -1.977941 |
| 28 | 6  | 0 | -1.153016 | 2.915302  | 0.046556  |
| 29 | 1  | 0 | -1.060047 | 3.989019  | 0.130994  |
| 30 | 17 | 0 | -1.089503 | 2.145722  | 1.613571  |

### 2v

E= -3776.706859 au

|    |    |   |           |           |           |
|----|----|---|-----------|-----------|-----------|
| 1  | 6  | 0 | 1.976730  | 0.609975  | 0.777034  |
| 2  | 6  | 0 | 0.369986  | -0.586698 | 0.048306  |
| 3  | 6  | 0 | 1.433896  | 1.513940  | -0.382762 |
| 4  | 8  | 0 | 0.768821  | 0.045738  | 1.288676  |
| 5  | 6  | 0 | -3.315216 | -0.232690 | -0.110583 |
| 6  | 6  | 0 | -3.992938 | -1.460908 | -0.049342 |
| 7  | 6  | 0 | -4.058896 | 0.956596  | -0.097450 |
| 8  | 6  | 0 | -5.381548 | -1.480455 | 0.020939  |
| 9  | 1  | 0 | -3.430867 | -2.381043 | -0.043358 |
| 10 | 6  | 0 | -5.448495 | 0.917577  | -0.030134 |
| 11 | 1  | 0 | -3.562367 | 1.917064  | -0.124573 |
| 12 | 6  | 0 | -6.119991 | -0.299217 | 0.028583  |
| 13 | 1  | 0 | -5.889018 | -2.437424 | 0.068647  |
| 14 | 1  | 0 | -6.003156 | 1.849014  | -0.018758 |
| 15 | 1  | 0 | -7.201938 | -0.327310 | 0.082052  |
| 16 | 7  | 0 | -1.900467 | -0.169345 | -0.198499 |
| 17 | 6  | 0 | 1.608012  | -1.377570 | -0.328566 |
| 18 | 1  | 0 | 1.631415  | -2.292526 | -0.899767 |
| 19 | 6  | 0 | 2.609254  | -0.614771 | 0.107280  |
| 20 | 6  | 0 | -1.216263 | 1.099455  | -0.530818 |
| 21 | 1  | 0 | -1.246110 | 1.785488  | 0.316889  |
| 22 | 1  | 0 | -1.707980 | 1.570987  | -1.382539 |
| 23 | 6  | 0 | -1.024373 | -1.183931 | 0.142412  |
| 24 | 8  | 0 | -1.279033 | -2.328286 | 0.448283  |
| 25 | 6  | 0 | 0.221195  | 0.667277  | -0.858171 |
| 26 | 1  | 0 | 2.550995  | 1.116179  | 1.546461  |
| 27 | 35 | 0 | 4.465805  | -0.820628 | -0.141392 |
| 28 | 1  | 0 | 0.304443  | 0.423191  | -1.917597 |
| 29 | 1  | 0 | 2.166029  | 1.674570  | -1.169019 |
| 30 | 17 | 0 | 1.029544  | 3.182242  | 0.209631  |

### TS v

E= -3776.657065 au

|    |   |   |           |           |           |
|----|---|---|-----------|-----------|-----------|
| 1  | 6 | 0 | 2.098876  | 0.421930  | 0.999399  |
| 2  | 6 | 0 | 0.407387  | -0.703155 | 0.288636  |
| 3  | 6 | 0 | 1.294254  | 1.672576  | -0.651241 |
| 4  | 8 | 0 | 0.808759  | 0.113399  | 1.325646  |
| 5  | 6 | 0 | -3.286254 | -0.233671 | -0.098449 |
| 6  | 6 | 0 | -3.957011 | -1.460931 | -0.207788 |
| 7  | 6 | 0 | -4.037501 | 0.944063  | 0.023455  |
| 8  | 6 | 0 | -5.347484 | -1.492919 | -0.193555 |
| 9  | 1 | 0 | -3.391105 | -2.375007 | -0.286710 |
| 10 | 6 | 0 | -5.428400 | 0.895322  | 0.030801  |
| 11 | 1 | 0 | -3.545347 | 1.901459  | 0.130281  |
| 12 | 6 | 0 | -6.092891 | -0.322125 | -0.077306 |
| 13 | 1 | 0 | -5.850073 | -2.449834 | -0.278688 |
| 14 | 1 | 0 | -5.989600 | 1.817650  | 0.128886  |

|    |    |   |           |           |           |
|----|----|---|-----------|-----------|-----------|
| 15 | 1  | 0 | -7.175919 | -0.358774 | -0.069121 |
| 16 | 7  | 0 | -1.863879 | -0.153233 | -0.128441 |
| 17 | 6  | 0 | 1.548341  | -1.399321 | -0.194518 |
| 18 | 1  | 0 | 1.540685  | -2.223871 | -0.888778 |
| 19 | 6  | 0 | 2.617565  | -0.657675 | 0.244450  |
| 20 | 6  | 0 | -1.216388 | 1.119472  | -0.525392 |
| 21 | 1  | 0 | -1.221793 | 1.826511  | 0.306020  |
| 22 | 1  | 0 | -1.801864 | 1.551547  | -1.340776 |
| 23 | 6  | 0 | -1.028361 | -1.163322 | 0.294859  |
| 24 | 8  | 0 | -1.346165 | -2.294550 | 0.605421  |
| 25 | 6  | 0 | 0.201660  | 0.851344  | -0.978128 |
| 26 | 1  | 0 | 2.620385  | 1.086864  | 1.670100  |
| 27 | 35 | 0 | 4.430195  | -0.844779 | -0.237949 |
| 28 | 1  | 0 | 0.277921  | 0.340625  | -1.932208 |
| 29 | 1  | 0 | 2.134321  | 1.758780  | -1.324415 |
| 30 | 17 | 0 | 1.061719  | 3.199038  | 0.231343  |

## REACTION w

### 1w

E= -3776.692887 au

|    |   |   |           |           |           |
|----|---|---|-----------|-----------|-----------|
| 1  | 6 | 0 | 3.950261  | 0.121791  | -0.029147 |
| 2  | 6 | 0 | 5.252839  | -0.304208 | -0.281149 |
| 3  | 6 | 0 | 5.546265  | -1.662004 | -0.353906 |
| 4  | 6 | 0 | 4.526025  | -2.593359 | -0.166241 |
| 5  | 6 | 0 | 3.225838  | -2.177183 | 0.096111  |
| 6  | 6 | 0 | 2.929632  | -0.812457 | 0.164721  |
| 7  | 1 | 0 | 3.729682  | 1.181492  | 0.008366  |
| 8  | 1 | 0 | 6.034004  | 0.432561  | -0.429960 |
| 9  | 1 | 0 | 6.558227  | -1.992957 | -0.556429 |
| 10 | 1 | 0 | 4.742400  | -3.654328 | -0.219022 |
| 11 | 1 | 0 | 2.439123  | -2.905162 | 0.233086  |
| 12 | 7 | 0 | 1.599877  | -0.364819 | 0.488446  |
| 13 | 6 | 0 | 0.527114  | -0.918316 | -0.194225 |
| 14 | 8 | 0 | 0.677607  | -1.706864 | -1.114679 |
| 15 | 8 | 0 | -1.257954 | 0.187729  | 1.230819  |
| 16 | 6 | 0 | -0.877273 | -0.578046 | 0.157354  |
| 17 | 6 | 0 | 1.152426  | 2.429771  | -0.292997 |
| 18 | 1 | 0 | 1.274168  | 1.745671  | -1.120983 |
| 19 | 6 | 0 | 1.479531  | 0.693560  | 1.502452  |
| 20 | 1 | 0 | 2.415526  | 0.693426  | 2.066561  |
| 21 | 1 | 0 | 0.698430  | 0.432579  | 2.216561  |
| 22 | 6 | 0 | -3.100944 | -0.450307 | 0.168499  |
| 23 | 6 | 0 | -1.985528 | -0.995004 | -0.525047 |
| 24 | 1 | 0 | -1.984849 | -1.614144 | -1.405327 |
| 25 | 6 | 0 | -2.613341 | 0.256701  | 1.224133  |

|    |    |   |           |           |           |
|----|----|---|-----------|-----------|-----------|
| 26 | 1  | 0 | -3.075904 | 0.828425  | 2.009547  |
| 27 | 35 | 0 | -4.921476 | -0.658839 | -0.277999 |
| 28 | 6  | 0 | 1.219850  | 2.087183  | 0.985164  |
| 29 | 1  | 0 | 1.078844  | 2.844455  | 1.751069  |
| 30 | 17 | 0 | 0.846441  | 4.069732  | -0.818004 |

## 2w

E= -3776.707520 au

|    |    |   |           |           |           |
|----|----|---|-----------|-----------|-----------|
| 1  | 6  | 0 | 1.844365  | 0.352452  | 1.153733  |
| 2  | 6  | 0 | 0.217815  | -0.516592 | 0.069888  |
| 3  | 6  | 0 | 1.260352  | 1.603255  | 0.405617  |
| 4  | 8  | 0 | 0.606882  | -0.303063 | 1.457185  |
| 5  | 6  | 0 | -3.460148 | -0.041281 | -0.071441 |
| 6  | 6  | 0 | -4.155505 | -1.224957 | -0.366970 |
| 7  | 6  | 0 | -4.189732 | 1.116679  | 0.236850  |
| 8  | 6  | 0 | -5.545881 | -1.231287 | -0.352355 |
| 9  | 1  | 0 | -3.605494 | -2.124641 | -0.591412 |
| 10 | 6  | 0 | -5.581311 | 1.092349  | 0.243641  |
| 11 | 1  | 0 | -3.682410 | 2.039150  | 0.484671  |
| 12 | 6  | 0 | -6.269644 | -0.079746 | -0.051199 |
| 13 | 1  | 0 | -6.066365 | -2.154078 | -0.582747 |
| 14 | 1  | 0 | -6.124321 | 1.998900  | 0.485875  |
| 15 | 1  | 0 | -7.353088 | -0.096777 | -0.044762 |
| 16 | 7  | 0 | -2.042082 | 0.012822  | -0.091109 |
| 17 | 6  | 0 | 1.442477  | -1.187191 | -0.508909 |
| 18 | 1  | 0 | 1.456867  | -1.892077 | -1.325490 |
| 19 | 6  | 0 | 2.455402  | -0.622676 | 0.148168  |
| 20 | 6  | 0 | -1.330509 | 1.306487  | -0.036327 |
| 21 | 1  | 0 | -1.395134 | 1.732809  | 0.969656  |
| 22 | 1  | 0 | -1.782437 | 2.006389  | -0.740875 |
| 23 | 6  | 0 | -1.189776 | -1.078282 | -0.039877 |
| 24 | 8  | 0 | -1.475488 | -2.254555 | -0.082333 |
| 25 | 6  | 0 | 0.117679  | 0.955559  | -0.410421 |
| 26 | 1  | 0 | 2.420214  | 0.567694  | 2.049114  |
| 27 | 35 | 0 | 4.305847  | -0.871572 | -0.089491 |
| 28 | 1  | 0 | 0.895228  | 2.316906  | 1.140190  |
| 29 | 1  | 0 | 0.274066  | 1.055235  | -1.483477 |
| 30 | 17 | 0 | 2.459303  | 2.515181  | -0.594824 |

## TS w

E= -3776.658641 au

|   |   |   |          |           |          |
|---|---|---|----------|-----------|----------|
| 1 | 6 | 0 | 1.880652 | 0.031619  | 1.355964 |
| 2 | 6 | 0 | 0.241659 | -0.694225 | 0.156752 |
| 3 | 6 | 0 | 1.161387 | 1.829513  | 0.205047 |

|    |    |   |           |           |           |
|----|----|---|-----------|-----------|-----------|
| 4  | 8  | 0 | 0.566913  | -0.331541 | 1.455035  |
| 5  | 6  | 0 | -3.432714 | -0.043717 | -0.041152 |
| 6  | 6  | 0 | -4.129753 | -1.110875 | -0.627350 |
| 7  | 6  | 0 | -4.158811 | 1.008907  | 0.534744  |
| 8  | 6  | 0 | -5.520739 | -1.109665 | -0.630010 |
| 9  | 1  | 0 | -3.582805 | -1.932609 | -1.060524 |
| 10 | 6  | 0 | -5.550333 | 0.997492  | 0.518660  |
| 11 | 1  | 0 | -3.646249 | 1.833658  | 1.011812  |
| 12 | 6  | 0 | -6.240862 | -0.060791 | -0.063305 |
| 13 | 1  | 0 | -6.043851 | -1.941891 | -1.087427 |
| 14 | 1  | 0 | -6.091774 | 1.820623  | 0.971001  |
| 15 | 1  | 0 | -7.324431 | -0.069235 | -0.073790 |
| 16 | 7  | 0 | -2.009968 | 0.006414  | -0.030918 |
| 17 | 6  | 0 | 1.415013  | -1.199381 | -0.465190 |
| 18 | 1  | 0 | 1.459285  | -1.725269 | -1.404860 |
| 19 | 6  | 0 | 2.451071  | -0.706932 | 0.291424  |
| 20 | 6  | 0 | -1.321037 | 1.308288  | 0.112149  |
| 21 | 1  | 0 | -1.296963 | 1.618942  | 1.161138  |
| 22 | 1  | 0 | -1.889894 | 2.053368  | -0.449191 |
| 23 | 6  | 0 | -1.191737 | -1.102603 | -0.070973 |
| 24 | 8  | 0 | -1.523009 | -2.252168 | -0.280781 |
| 25 | 6  | 0 | 0.087390  | 1.194653  | -0.437389 |
| 26 | 1  | 0 | 2.359738  | 0.366489  | 2.262987  |
| 27 | 35 | 0 | 4.297205  | -0.833459 | -0.055826 |
| 28 | 1  | 0 | 1.025007  | 2.399649  | 1.112910  |
| 29 | 1  | 0 | 0.142225  | 1.118676  | -1.518176 |
| 30 | 17 | 0 | 2.474057  | 2.482337  | -0.775636 |

## REACTION x

### 1x

E= -3776.696471 au

|    |   |   |           |           |           |
|----|---|---|-----------|-----------|-----------|
| 1  | 6 | 0 | 3.367061  | -0.179516 | -0.553058 |
| 2  | 6 | 0 | 4.581394  | -0.849176 | -0.693344 |
| 3  | 6 | 0 | 4.806459  | -2.046578 | -0.022885 |
| 4  | 6 | 0 | 3.807077  | -2.568909 | 0.797517  |
| 5  | 6 | 0 | 2.598640  | -1.901279 | 0.953022  |
| 6  | 6 | 0 | 2.369723  | -0.699141 | 0.275639  |
| 7  | 1 | 0 | 3.196509  | 0.738979  | -1.100510 |
| 8  | 1 | 0 | 5.346067  | -0.432442 | -1.338959 |
| 9  | 1 | 0 | 5.748739  | -2.569582 | -0.137506 |
| 10 | 1 | 0 | 3.970514  | -3.500367 | 1.327540  |
| 11 | 1 | 0 | 1.828392  | -2.313501 | 1.590218  |
| 12 | 7 | 0 | 1.140010  | 0.017762  | 0.478386  |
| 13 | 6 | 0 | -0.062226 | -0.677384 | 0.361304  |
| 14 | 8 | 0 | -0.118959 | -1.811763 | -0.078244 |
| 15 | 8 | 0 | -1.342159 | 0.910456  | 1.794101  |

|    |    |   |           |           |           |
|----|----|---|-----------|-----------|-----------|
| 16 | 6  | 0 | -1.324401 | -0.023274 | 0.786761  |
| 17 | 6  | 0 | 0.538696  | 1.730530  | -1.861738 |
| 18 | 6  | 0 | 1.213880  | 1.476708  | 0.589390  |
| 19 | 1  | 0 | 2.231613  | 1.732183  | 0.890240  |
| 20 | 1  | 0 | 0.562711  | 1.830774  | 1.385911  |
| 21 | 6  | 0 | -2.618586 | -0.260672 | 0.398722  |
| 22 | 6  | 0 | -2.635796 | 1.253274  | 2.020097  |
| 23 | 1  | 0 | -2.800197 | 1.979719  | 2.797924  |
| 24 | 6  | 0 | 0.875124  | 2.226526  | -0.680301 |
| 25 | 6  | 0 | -3.464810 | 0.572694  | 1.188944  |
| 26 | 1  | 0 | -4.538511 | 0.638731  | 1.133970  |
| 27 | 35 | 0 | -3.237070 | -1.427020 | -0.938575 |
| 28 | 1  | 0 | 0.306055  | 2.371719  | -2.700596 |
| 29 | 1  | 0 | 0.491882  | 0.658734  | -2.009584 |
| 30 | 17 | 0 | 0.961714  | 3.974944  | -0.436735 |

**2x**

E= -3776.708543 au

|    |    |   |           |           |           |
|----|----|---|-----------|-----------|-----------|
| 1  | 6  | 0 | -2.093731 | 1.945992  | -1.363688 |
| 2  | 6  | 0 | -0.875054 | 0.350739  | -0.616197 |
| 3  | 6  | 0 | -1.471858 | 2.640236  | -0.105640 |
| 4  | 8  | 0 | -0.961788 | 1.157113  | -1.803547 |
| 5  | 6  | 0 | 2.766357  | -0.085021 | -0.069196 |
| 6  | 6  | 0 | 3.181110  | -1.423637 | -0.148250 |
| 7  | 6  | 0 | 3.733085  | 0.920747  | 0.073882  |
| 8  | 6  | 0 | 4.535468  | -1.731090 | -0.082451 |
| 9  | 1  | 0 | 2.447111  | -2.203818 | -0.271439 |
| 10 | 6  | 0 | 5.084556  | 0.594362  | 0.141509  |
| 11 | 1  | 0 | 3.442764  | 1.961876  | 0.122208  |
| 12 | 6  | 0 | 5.495581  | -0.732158 | 0.064118  |
| 13 | 1  | 0 | 4.839242  | -2.770058 | -0.144134 |
| 14 | 1  | 0 | 5.815367  | 1.387648  | 0.251190  |
| 15 | 1  | 0 | 6.548124  | -0.984637 | 0.116156  |
| 16 | 7  | 0 | 1.393190  | 0.267409  | -0.115947 |
| 17 | 6  | 0 | -2.306921 | -0.139383 | -0.478234 |
| 18 | 6  | 0 | -3.068407 | 0.865052  | -0.915058 |
| 19 | 6  | 0 | 0.944020  | 1.618011  | 0.263868  |
| 20 | 1  | 0 | 1.181045  | 2.338265  | -0.525222 |
| 21 | 1  | 0 | 1.423385  | 1.930540  | 1.190768  |
| 22 | 6  | 0 | 0.376952  | -0.515101 | -0.639716 |
| 23 | 8  | 0 | 0.444397  | -1.647792 | -1.056408 |
| 24 | 6  | 0 | -0.578455 | 1.489818  | 0.415421  |
| 25 | 1  | 0 | -2.426787 | 2.610240  | -2.157151 |
| 26 | 1  | 0 | -4.144680 | 0.948415  | -0.895586 |
| 27 | 35 | 0 | -2.843043 | -1.764867 | 0.295554  |
| 28 | 1  | 0 | -2.211401 | 2.955638  | 0.627711  |
| 29 | 1  | 0 | -0.878072 | 3.505632  | -0.405053 |

30 17 0 -0.969354 1.020750 2.129131

### TS x

E= -3776.660130 au

|    |    |   |           |           |           |
|----|----|---|-----------|-----------|-----------|
| 1  | 6  | 0 | -2.270093 | 1.857601  | -1.474243 |
| 2  | 6  | 0 | -0.942988 | 0.274325  | -0.855827 |
| 3  | 6  | 0 | -1.410707 | 2.706093  | 0.304826  |
| 4  | 8  | 0 | -1.047196 | 1.300830  | -1.767231 |
| 5  | 6  | 0 | 2.706016  | -0.052892 | -0.111939 |
| 6  | 6  | 0 | 3.098733  | -1.395763 | -0.024246 |
| 7  | 6  | 0 | 3.687949  | 0.947055  | -0.104690 |
| 8  | 6  | 0 | 4.449106  | -1.716217 | 0.066172  |
| 9  | 1  | 0 | 2.352713  | -2.174159 | -0.040926 |
| 10 | 6  | 0 | 5.035221  | 0.611247  | -0.006205 |
| 11 | 1  | 0 | 3.410446  | 1.989580  | -0.191498 |
| 12 | 6  | 0 | 5.424564  | -0.721664 | 0.078300  |
| 13 | 1  | 0 | 4.737149  | -2.759238 | 0.133713  |
| 14 | 1  | 0 | 5.779485  | 1.399540  | -0.003271 |
| 15 | 1  | 0 | 6.473789  | -0.982666 | 0.152083  |
| 16 | 7  | 0 | 1.332168  | 0.316469  | -0.189516 |
| 17 | 6  | 0 | -2.262052 | -0.179270 | -0.583128 |
| 18 | 6  | 0 | -3.106226 | 0.845064  | -0.946215 |
| 19 | 6  | 0 | 0.908542  | 1.640492  | 0.309129  |
| 20 | 1  | 0 | 1.080126  | 2.409157  | -0.451159 |
| 21 | 1  | 0 | 1.515592  | 1.882332  | 1.183565  |
| 22 | 6  | 0 | 0.370458  | -0.456572 | -0.806556 |
| 23 | 8  | 0 | 0.513802  | -1.578753 | -1.246230 |
| 24 | 6  | 0 | -0.562757 | 1.649865  | 0.665450  |
| 25 | 1  | 0 | -2.564277 | 2.682694  | -2.106371 |
| 26 | 1  | 0 | -4.167979 | 0.917724  | -0.772855 |
| 27 | 35 | 0 | -2.733420 | -1.776205 | 0.286922  |
| 28 | 1  | 0 | -2.246135 | 2.951931  | 0.945415  |
| 29 | 1  | 0 | -0.991751 | 3.535723  | -0.252098 |
| 30 | 17 | 0 | -0.913064 | 0.839204  | 2.219437  |

### REACTION y

#### 1y

E= -3776.687808 au

|   |   |   |           |           |           |
|---|---|---|-----------|-----------|-----------|
| 1 | 6 | 0 | -3.363900 | -0.207212 | 0.308408  |
| 2 | 6 | 0 | -4.510749 | -0.975422 | 0.503210  |
| 3 | 6 | 0 | -4.528333 | -2.316747 | 0.133758  |
| 4 | 6 | 0 | -3.391945 | -2.888904 | -0.436499 |
| 5 | 6 | 0 | -2.248455 | -2.125291 | -0.644401 |



|    |    |   |           |           |           |
|----|----|---|-----------|-----------|-----------|
| 6  | 6  | 0 | -2.231505 | -0.778598 | -0.272157 |
| 7  | 1  | 0 | -3.345535 | 0.829246  | 0.617246  |
| 8  | 1  | 0 | -5.385714 | -0.522781 | 0.955940  |
| 9  | 1  | 0 | -5.418368 | -2.914889 | 0.292677  |
| 10 | 1  | 0 | -3.394491 | -3.934669 | -0.722415 |
| 11 | 1  | 0 | -1.362956 | -2.571475 | -1.076186 |
| 12 | 7  | 0 | -1.071965 | 0.037660  | -0.538314 |
| 13 | 6  | 0 | 0.147011  | -0.379545 | -0.024665 |
| 14 | 8  | 0 | 0.257672  | -1.400090 | 0.632466  |
| 15 | 8  | 0 | 1.303961  | 1.753149  | -0.618141 |
| 16 | 6  | 0 | 1.368550  | 0.425547  | -0.272319 |
| 17 | 6  | 0 | -1.666914 | 3.100791  | 0.071971  |
| 18 | 6  | 0 | -1.252830 | 1.093031  | -1.541423 |
| 19 | 1  | 0 | -2.014187 | 0.731102  | -2.239029 |
| 20 | 1  | 0 | -0.338130 | 1.193404  | -2.130031 |
| 21 | 6  | 0 | 2.692011  | 0.083900  | -0.135984 |
| 22 | 6  | 0 | 2.570846  | 2.227945  | -0.692607 |
| 23 | 1  | 0 | 2.668015  | 3.270446  | -0.944880 |
| 24 | 6  | 0 | -1.672725 | 2.472269  | -1.097571 |
| 25 | 1  | 0 | -2.036684 | 3.080672  | -1.924100 |
| 26 | 6  | 0 | 3.467766  | 1.248057  | -0.414439 |
| 27 | 1  | 0 | 4.541926  | 1.325950  | -0.397312 |
| 28 | 35 | 0 | 3.436270  | -1.583908 | 0.307209  |
| 29 | 17 | 0 | -1.143280 | 2.462411  | 1.611253  |
| 30 | 1  | 0 | -2.009838 | 4.121756  | 0.166385  |

**2y**

E= -3776.705661 au

|    |   |   |           |           |           |
|----|---|---|-----------|-----------|-----------|
| 1  | 6 | 0 | 2.315396  | 1.570355  | 0.910387  |
| 2  | 6 | 0 | 0.922624  | 0.041122  | 0.388847  |
| 3  | 6 | 0 | 1.721694  | 2.147203  | -0.422746 |
| 4  | 8 | 0 | 1.155730  | 0.947908  | 1.480483  |
| 5  | 6 | 0 | -2.748175 | -0.205714 | -0.054271 |
| 6  | 6 | 0 | -3.259206 | -1.475207 | 0.260351  |
| 7  | 6 | 0 | -3.641658 | 0.828447  | -0.370427 |
| 8  | 6 | 0 | -4.633376 | -1.687215 | 0.253971  |
| 9  | 1 | 0 | -2.582808 | -2.274286 | 0.518360  |
| 10 | 6 | 0 | -5.014026 | 0.596879  | -0.375041 |
| 11 | 1 | 0 | -3.277304 | 1.820354  | -0.600706 |
| 12 | 6 | 0 | -5.520153 | -0.660733 | -0.063569 |
| 13 | 1 | 0 | -5.011135 | -2.673221 | 0.500273  |
| 14 | 1 | 0 | -5.686362 | 1.411340  | -0.620007 |
| 15 | 1 | 0 | -6.589107 | -0.838542 | -0.066171 |
| 16 | 7 | 0 | -1.352244 | 0.047958  | -0.075236 |
| 17 | 6 | 0 | 2.297697  | -0.593281 | 0.229352  |
| 18 | 6 | 0 | 3.174263  | 0.366174  | 0.527889  |
| 19 | 6 | 0 | -0.820290 | 1.299336  | -0.654915 |

|    |    |   |           |           |           |
|----|----|---|-----------|-----------|-----------|
| 20 | 1  | 0 | -1.033204 | 2.145594  | -0.000022 |
| 21 | 1  | 0 | -1.283444 | 1.482599  | -1.625364 |
| 22 | 6  | 0 | -0.386701 | -0.714329 | 0.559247  |
| 23 | 8  | 0 | -0.524680 | -1.762499 | 1.147945  |
| 24 | 6  | 0 | 0.688460  | 1.040972  | -0.777004 |
| 25 | 1  | 0 | 2.742637  | 2.305621  | 1.585811  |
| 26 | 1  | 0 | 0.910995  | 0.595603  | -1.747215 |
| 27 | 1  | 0 | 4.249860  | 0.353559  | 0.435731  |
| 28 | 35 | 0 | 2.613722  | -2.299902 | -0.491488 |
| 29 | 1  | 0 | 2.471101  | 2.281472  | -1.197310 |
| 30 | 17 | 0 | 1.026265  | 3.808438  | -0.173793 |

### TS y

E= -3776.657818 au

|    |    |   |           |           |           |
|----|----|---|-----------|-----------|-----------|
| 1  | 6  | 0 | 2.546573  | 1.307678  | 1.185511  |
| 2  | 6  | 0 | 0.979612  | -0.063559 | 0.629980  |
| 3  | 6  | 0 | 1.694474  | 2.118041  | -0.765584 |
| 4  | 8  | 0 | 1.262248  | 0.966324  | 1.503007  |
| 5  | 6  | 0 | -2.705517 | -0.117207 | -0.016044 |
| 6  | 6  | 0 | -3.247512 | -1.394316 | 0.192637  |
| 7  | 6  | 0 | -3.571053 | 0.956473  | -0.269477 |
| 8  | 6  | 0 | -4.625346 | -1.577124 | 0.145979  |
| 9  | 1  | 0 | -2.593892 | -2.225182 | 0.403762  |
| 10 | 6  | 0 | -4.947574 | 0.755690  | -0.317060 |
| 11 | 1  | 0 | -3.181783 | 1.955125  | -0.414906 |
| 12 | 6  | 0 | -5.484320 | -0.510739 | -0.109656 |
| 13 | 1  | 0 | -5.027425 | -2.570629 | 0.309568  |
| 14 | 1  | 0 | -5.598808 | 1.600234  | -0.511841 |
| 15 | 1  | 0 | -6.556409 | -0.664888 | -0.144869 |
| 16 | 7  | 0 | -1.299092 | 0.107869  | 0.001991  |
| 17 | 6  | 0 | 2.218865  | -0.724688 | 0.367196  |
| 18 | 6  | 0 | 3.212412  | 0.174327  | 0.676221  |
| 19 | 6  | 0 | -0.745212 | 1.305968  | -0.666073 |
| 20 | 1  | 0 | -0.905213 | 2.193017  | -0.050449 |
| 21 | 1  | 0 | -1.279596 | 1.447380  | -1.608640 |
| 22 | 6  | 0 | -0.407978 | -0.655100 | 0.723447  |
| 23 | 8  | 0 | -0.646320 | -1.666911 | 1.349667  |
| 24 | 6  | 0 | 0.732642  | 1.103286  | -0.928488 |
| 25 | 1  | 0 | 2.950923  | 2.155323  | 1.717462  |
| 26 | 1  | 0 | 0.943009  | 0.406686  | -1.735571 |
| 27 | 1  | 0 | 4.267655  | 0.091415  | 0.469886  |
| 28 | 35 | 0 | 2.391586  | -2.329234 | -0.596994 |
| 29 | 1  | 0 | 2.561115  | 2.163292  | -1.406727 |
| 30 | 17 | 0 | 1.234160  | 3.749922  | -0.238809 |

### REACTION z

## 1z

E= -3776.691662 au

|    |    |   |           |           |           |
|----|----|---|-----------|-----------|-----------|
| 1  | 6  | 0 | 3.436697  | 0.348938  | -0.145899 |
| 2  | 6  | 0 | 4.699698  | -0.051648 | -0.578299 |
| 3  | 6  | 0 | 5.025256  | -1.401981 | -0.645480 |
| 4  | 6  | 0 | 4.076795  | -2.352820 | -0.270049 |
| 5  | 6  | 0 | 2.819640  | -1.961694 | 0.173756  |
| 6  | 6  | 0 | 2.489440  | -0.603912 | 0.238131  |
| 7  | 1  | 0 | 3.189143  | 1.402950  | -0.121696 |
| 8  | 1  | 0 | 5.423380  | 0.699992  | -0.872571 |
| 9  | 1  | 0 | 6.005448  | -1.712557 | -0.987997 |
| 10 | 1  | 0 | 4.317952  | -3.408753 | -0.316239 |
| 11 | 1  | 0 | 2.089354  | -2.705719 | 0.460253  |
| 12 | 7  | 0 | 1.208391  | -0.195687 | 0.744930  |
| 13 | 6  | 0 | 0.066680  | -0.810612 | 0.239818  |
| 14 | 8  | 0 | 0.095106  | -1.547799 | -0.729846 |
| 15 | 8  | 0 | -1.328719 | -0.321805 | 2.247560  |
| 16 | 6  | 0 | -1.241757 | -0.568388 | 0.898809  |
| 17 | 6  | 0 | 0.454431  | 2.434965  | -0.318231 |
| 18 | 1  | 0 | 0.485518  | 1.647373  | -1.058006 |
| 19 | 6  | 0 | 1.165937  | 0.986192  | 1.618360  |
| 20 | 1  | 0 | 2.168989  | 1.105667  | 2.035500  |
| 21 | 1  | 0 | 0.512283  | 0.792264  | 2.467950  |
| 22 | 6  | 0 | -2.514600 | -0.647739 | 0.393778  |
| 23 | 6  | 0 | -2.644930 | -0.240199 | 2.570630  |
| 24 | 1  | 0 | -2.863564 | -0.058218 | 3.609337  |
| 25 | 6  | 0 | 0.746014  | 2.280910  | 0.965612  |
| 26 | 1  | 0 | 0.683181  | 3.135052  | 1.634157  |
| 27 | 17 | 0 | -0.029195 | 3.972409  | -0.997276 |
| 28 | 6  | 0 | -3.420762 | -0.424189 | 1.472926  |
| 29 | 1  | 0 | -4.496503 | -0.410980 | 1.419433  |
| 30 | 35 | 0 | -3.044569 | -0.960524 | -1.381595 |

## 2z

E= -3776.707279 au

|   |   |   |           |           |           |
|---|---|---|-----------|-----------|-----------|
| 1 | 6 | 0 | 2.219929  | 1.300701  | 1.402176  |
| 2 | 6 | 0 | 0.734758  | -0.002325 | 0.582292  |
| 3 | 6 | 0 | 1.663788  | 2.163926  | 0.214391  |
| 4 | 8 | 0 | 0.979692  | 0.704280  | 1.819187  |
| 5 | 6 | 0 | -2.916103 | 0.138037  | -0.063789 |
| 6 | 6 | 0 | -3.544514 | -1.111176 | 0.065830  |
| 7 | 6 | 0 | -3.704971 | 1.274326  | -0.297991 |
| 8 | 6 | 0 | -4.927891 | -1.202684 | -0.039584 |
| 9 | 1 | 0 | -2.950950 | -1.990226 | 0.258522  |

|    |    |   |           |           |           |
|----|----|---|-----------|-----------|-----------|
| 10 | 6  | 0 | -5.088326 | 1.163124  | -0.403733 |
| 11 | 1  | 0 | -3.251674 | 2.252040  | -0.388925 |
| 12 | 6  | 0 | -5.710071 | -0.074358 | -0.275731 |
| 13 | 1  | 0 | -5.396145 | -2.175097 | 0.063703  |
| 14 | 1  | 0 | -5.677814 | 2.055073  | -0.583445 |
| 15 | 1  | 0 | -6.787325 | -0.158838 | -0.356988 |
| 16 | 7  | 0 | -1.505821 | 0.273492  | 0.020806  |
| 17 | 6  | 0 | 2.058203  | -0.718038 | 0.383569  |
| 18 | 6  | 0 | 2.992892  | 0.106343  | 0.858164  |
| 19 | 6  | 0 | -0.843588 | 1.538391  | -0.354648 |
| 20 | 1  | 0 | -1.043320 | 2.308626  | 0.397293  |
| 21 | 1  | 0 | -1.225687 | 1.885339  | -1.316019 |
| 22 | 6  | 0 | -0.639293 | -0.653741 | 0.579170  |
| 23 | 8  | 0 | -0.897038 | -1.757653 | 1.001244  |
| 24 | 6  | 0 | 0.649268  | 1.182459  | -0.417594 |
| 25 | 1  | 0 | 2.674889  | 1.868480  | 2.209412  |
| 26 | 1  | 0 | 1.189846  | 3.061810  | 0.603595  |
| 27 | 1  | 0 | 0.933845  | 0.890907  | -1.427565 |
| 28 | 17 | 0 | 2.942128  | 2.751864  | -0.925617 |
| 29 | 1  | 0 | 4.065973  | 0.015569  | 0.797667  |
| 30 | 35 | 0 | 2.276207  | -2.311793 | -0.589314 |

## TS z

E= -3776.659370 au

|    |   |   |           |           |           |
|----|---|---|-----------|-----------|-----------|
| 1  | 6 | 0 | 2.219568  | 1.121367  | 1.749788  |
| 2  | 6 | 0 | 0.729834  | -0.118852 | 0.800740  |
| 3  | 6 | 0 | 1.594178  | 2.249716  | -0.123459 |
| 4  | 8 | 0 | 0.907114  | 0.748829  | 1.862439  |
| 5  | 6 | 0 | -2.897938 | 0.137529  | -0.046341 |
| 6  | 6 | 0 | -3.499518 | -1.122118 | -0.184378 |
| 7  | 6 | 0 | -3.705371 | 1.283669  | -0.062114 |
| 8  | 6 | 0 | -4.879086 | -1.216266 | -0.334218 |
| 9  | 1 | 0 | -2.890812 | -2.011617 | -0.159440 |
| 10 | 6 | 0 | -5.083984 | 1.172635  | -0.218280 |
| 11 | 1 | 0 | -3.268495 | 2.265655  | 0.062313  |
| 12 | 6 | 0 | -5.680122 | -0.076860 | -0.354914 |
| 13 | 1 | 0 | -5.328548 | -2.197199 | -0.440086 |
| 14 | 1 | 0 | -5.690180 | 2.071406  | -0.225929 |
| 15 | 1 | 0 | -6.753801 | -0.162270 | -0.474334 |
| 16 | 7 | 0 | -1.487931 | 0.279695  | 0.089910  |
| 17 | 6 | 0 | 1.992640  | -0.736742 | 0.561118  |
| 18 | 6 | 0 | 2.941443  | 0.083764  | 1.126316  |
| 19 | 6 | 0 | -0.838838 | 1.557275  | -0.272959 |
| 20 | 1 | 0 | -0.962801 | 2.292766  | 0.528205  |
| 21 | 1 | 0 | -1.330430 | 1.945288  | -1.168179 |
| 22 | 6 | 0 | -0.665273 | -0.675262 | 0.648716  |

|    |    |   |           |           |           |
|----|----|---|-----------|-----------|-----------|
| 23 | 8  | 0 | -0.968584 | -1.801843 | 0.980523  |
| 24 | 6  | 0 | 0.634453  | 1.316015  | -0.543110 |
| 25 | 1  | 0 | 2.567829  | 1.839162  | 2.476934  |
| 26 | 1  | 0 | 1.322874  | 3.138574  | 0.428016  |
| 27 | 1  | 0 | 0.838782  | 0.787716  | -1.469371 |
| 28 | 17 | 0 | 3.023214  | 2.521808  | -1.125922 |
| 29 | 1  | 0 | 4.011959  | 0.024872  | 1.016670  |
| 30 | 35 | 0 | 2.280696  | -2.178688 | -0.608246 |
